# Supplementary material for: Coevolution of enamel, ganoin, enameloid, and their matrix SCPP genes in osteichthyans
Source: PubMed Central journal article supplement — iScience. 2021 Jan 1;24(1):102023. doi: 10.1016/j.isci.2020.102023 (PMC7814152; doi:10.1016/j.isci.2020.102023), 2021-01-01
Supplement: mmc1.pdf [file mmc1.pdf]

**iScience, Volume 24**

**Supplemental Information**

**Coevolution of enamel, ganoin, enameloid, and their  
matrix SCPP genes in osteichthyans**

**Kazuhiko Kawasaki, Joseph N. Keating, Mitsushiro Nakatomi, Monique Welten, Masato Mikami, Ichiro Sasagawa, Mark N. Puttick, Philip C.J. Donoghue, and Mikio Ishiyama**

**A**

```
exon2          exon3          exon4          exon5
AMELX_human    MGTWILFACL LGAAFAMP  LPPHPGHPG---YINFYE  NSHSQAINVDRTAL  VLTPLKWKYQS-IR---PP
AMEL_pig       MGTWIFFACL LGASLAMP  LPPHPGHPG---YINFYE  -----          VLTPLKWYNMIR---HP
AMEL_platypus  MGTWILFTCL LIGAAFAIP  LPPHPAHPG---YINFYE  -----          VLTPLQWYONMKR---QQ
AMEL_Anolis    MEGWTLVMCL LSTTFAIP  LFPQ---HPG---YINFYE  -----          VMTPLKWKYOSLIG---HQ
AMEL_caiman    MEGWMLITCL LGATFAIP  LPPHPHPHPG---YVNFYE  -----          VLTPLKWKYOSLMR---QP
AMEL_axolotl   MGPWILLTCL LLSASCAMP  LPPHPNHPG---YINFYE  -----          VMTPLKWKYOSMMR---QQ
AMEL_Xenopus   MRLWVMLTAL TGAAFSVP  LPPHPHPHPG---YVNFYE  -----          ILSPLKWKYOSMMK---HQ
AMEL_lungfish  MKTLVLVACL LSSSIIVP  LPPAGQH-GNPGVINIYE  -----          LLSPLYAWLNKMMRQOQP
AMEL_coelacanth MKSLSLITCF LGAALALP  LGPQQQPQGPASIVNFYE  -----          MMSPLHWAD-WIROOSQP
                LGPHRQNPGTANVVNYE
<- aromatic residue rich region (YY)

exon2          exon3          exon4          exon5
SCPP5_medaka   MKFAILCLCL VSTACAVE  FQYLPHFET---GSRQQQP---EVC--  GNNP-FSSGF--PQE-----GLPGAYNIEL  IYFHRFPGGPTGGANET-Q
SCPP5_tilapia  MKLAILCLCL ASTACAAP  FQYLPHYT---GSRQQMP---TLC--  MNNP-FTAGF--PHT-----GLPGGYNVEL  IYFHRFPGGA-GVSSBA-Q
SCPP5_fugu     MKLAILCLCL ASTASAAP  S---FHYLPHYGGPQQVAPA---PQQ--  VKTP-FTAAQTLTQP-----GLVGGYNVEL  LYFHRFPGTF--GANTA-Q
SCPP5_stickleback MKLVIFCLCL ASTACAAP  SI--FHYLPHYAGSRQQVE---PQQVI  VGNP-FTAGQSLPPP-----GAAGAYNVEL  IYFHRVAGGV-GGTNAG-Q
SCPP5_zebrafish MWTSLLLCLL LAGAVSAA  LSPFFNYLPHYGSPR-----Q--  GNTGGFQGMSPQHP-----AMNAPIIMEI  IFPPRFANPAGGAAGT-S
SCPP5_eel      MKTAIACLCF ASTTICAA  MTSLYDYLPQIGVPPQPSQ---PQQ--  RTTNVVAPAPPAQPP-----GMAAPIIMEI  VFPPRFPSQVTGGQQTG-S
SCPP5_gar      MKTIILLTCL FGSIFAAP  MQPLLYEFLPOVETP---QCTAPYRQQPQ--  -NNPYAPPSTPQQQ-----GPTRPAPFEI  LFYGYPRPSPFGGPEHAGA
SCPP5_bichir   MKATVLLMCL LGLTTFAVE  MQRLYEFLPOVNSP---QSAQPS-QQP--  QSNPERAPIVPEAPOTPAAPPAEPAGPAPPALEI  MFYGYPGQTLGQP---SS
                <- aromatic residue rich region (YY)

exon6
AMELX_human    YPSYGYEPMG GWLHHQIIPVLSQQHPPTHT-LQPHHHIPVVPAQQPV-IPQQPMMFVPGQHSMTPIQHHQPNLP---E--
AMEL_pig       YTSYGYEPMG GWLHHQIIPVVSQQTPQSHA-LQPHHHIPMVPAQQPG-IPQQPMMELPGQHSMTPTQHHQPNLP---L--
AMEL_platypus  YPSYGYEPMG GWLHHQIIPVLSQQQTPHTA-LQPHHHIPVMAAQQEM-IPQQPMMEMPGQPSVTPTOHHQSNLPQBAQQ--
AMEL_Anolis    YPRYGFEPMG GWMHHAAGP-TMHTTFQSH-PSVHSTLHMQQPPHR---ALNPHMQPSGHNEFGSMFGQNTLMP-----
AMEL_Paleosuchus YSSYGYEPMG GWLHQPMPL-IAQQHPPIQT-LTPHHQIPFLS-----PQHFLMQMPGPHQMMPIPOQQPSLOMPVQEPV
AMEL_axolotl   YPSYGYEPMG GWLQQMMP-GSEPMQCHM---QPIPMQPHHEMMLPQQMPLP---HGQMMPLPQHQQLLPQPHQC--
AMEL_Xenopus   YPNYGYEPMG SWLQNVVPAPEMMPQQQH---PQQHVVPKLPFHHPFLIPQQEVVVEP--HPEVILTPQHTHQLKPTYL--
AMEL_lungfish  YPAFGFEPMQ PW-----
AMEL_coelacanth YPVIEIE-----VKPRFPMSPQEPISPMQPPQPMPE-----
                YY -><- E/Q-rich core region (E/Q)

exon6          exon7          exon8          exon9
SCPP5_medaka   FSSYGFIKYS IPQQPPGRQLEI FYEYDFSQ-QR  IVQNLPEMSNPIM-----PD  VFP-IEYEPQNM-----PQQTIN
SCPP5_tilapia  FSSFLIKYSI PQQPPGRQVEV FYAYDFSQ-QR  IIPNIPMTKGPV-----PE  VLP-FDYPPQNI-----PQQNMN
SCPP5_fugu     FFSHGFIKYS IPQQPPGRQVEV YYPYDFSQ-QR  ILTNIPLTNVPHL-----PS  VLP-IEYPAHI-----PN
SCPP5_stickleback SF---GFIKYS IPQQPPGRQVEV YYPYDFSQ-QR  IMTNLPEMTNSPQM-----EN  VFP-FEYEPQNI-----PQQIPN
SCPP5_zebrafish SFPQAFIKYS LKAPGRKVEI FYPYDFGR-AQ  DQPNVPLI---POL-----PN  IFF-FDLMPQTV-----PQQPPV
SCPP5_eel      AFPSCAFIKY IKAPGRQVEI FYPYDLIQQQQ  MLPNVQMPAMPNIPQFPQI-----PN  LFP-YGFLPPTG-----PQQN-N
SCPP5_gar      MFSQAFIRQK IPQPPGRQLEI LFYYSFGQHQ  MFPGASNMPQPPQMQQLPQLPQQN  MFP-YGNMPTGG-----PQQNPN
SCPP5_bichir   MFSQGFIRQK IPQPPGRQLEI LYFYGFQQ-QQ  MFPGFSNLSFPVPMQ-----FP  MLPN  MFP-YGSMVPM---PQQSPQTPN
                (YY)-><- E/Q-rich core region (E/Q)
```



## B

|                 | exon2                  | exon3                    | exon4                             |
|-----------------|------------------------|--------------------------|-----------------------------------|
| AMBN_human      | ---MKDLILILCLEMSFAVP   | --FFFO-----              | CSGTPGMALE TMRQLGSL-QLNLTLSQ      |
| AMBN_platypus   | ---MENLVLLSLFGTSFAIP   | --VFLO-----              | PGGPPGMGLE TMRHLG---NLNLLFO       |
| AMBN_caiman     | ---MNVWMLTLCLLGTGFALP  | --MYFO-----              | HTGTRGMAMLE -MROYGR--QNMNMLEFO    |
| AMBN_Anolis     | ---MKQWMLVSSLLGICSAIP  | --LFFO-----              | HAGIPGMGLE RTROLGGL-NIPPAVFO      |
| AMBN_Xenopus    | ---MEPLVLVLCLLSTAMAYP  | --MHFO-----              | APGTQGLAILE TMRQQAANTLTAFPSQ      |
| AMBN_lungfish   | ---MKALSLLMCLLGTIHTLFP | --LMFO-----              | QAGTFGVALLE RMRKYGQ--FGMSFDDQ     |
| AMBN_coelacanth | ---MKRWILGCFLGTAFSMP   | --MFFO-----              | IPMARVLE KMRQYGG--EYMPQSPQ        |
| AMBN_bichir     | ---MKAAILLICALGTTWAMP  | MQVYQOMQOQIQLOQQFO       | ---HGGIPALATIQE MMRDIARYKSLMCHYPE |
| AMBN_sturgeon   | ---MKAVVILMCLLGTTCVVP  | LOVYHQIQOQOQIQAQEQAQOQFO | PGMLRYPILE MMQDIARYKRFKQOHPQ      |
| AMBN_gar        | ---MRSATVLMCLIGTTLTSMF | LQVYQQLQROMLQIQHHQOQFO   | QOQAGNPRYFLE TMRMARYKAFMQOQSM     |
| AMBN_zebrafish  | MTQMRLIVMIVCFLAGTSAVP  | -----                    | -----                             |
| AMBN_medaka     | ---MIIILLLSCITLLVSAVP  | -----                    | -----                             |
| AMBN_tilapia    | ---MIIITLLSCFTIVVSAVP  | -----                    | -----                             |
| AMBN_fugu       | ---MIVPTLLSWFIIMASAAP  | -----                    | -----                             |

  

|                 | exon5                                                                                               |                                             |
|-----------------|-----------------------------------------------------------------------------------------------------|---------------------------------------------|
| AMBN_human      | YSRYGFGKSFNSLMMHGFL                                                                                 | PPHSSLPWMRPR--EHETQQ--                      |
| AMBN_platypus   | FSRFGFGKQFNSLMMHGFL                                                                                 | PPHSNYPWLSPR--DQETQQ--                      |
| AMBN_caiman     | YGRYDYGEPFNSVWLHGFL                                                                                 | PPHSSFPWLQQR-POEHETQQ--                     |
| AMBN_Anolis     | ALPYSYADPFHSMWGRSFL                                                                                 | PSHTFLWMTGGPQRQDTQQ--                       |
| AMBN_Xenopus    | ISRFGYNDPVSVLWLHGFL                                                                                 | PPHSSYPWLHOR-PQLSDNQQ--                     |
| AMBN_lungfish   | FFVNGYNQFQSLLPWYQQL                                                                                 | HLFPALVPWAQOP--HQENQQ--                     |
| AMBN_coelacanth | NPFWGYNPVTSOQDMSWL                                                                                  | -----THLVNSMFPOLRLYPWLQPP--SQHDNQQ--        |
| AMBN_bichir     | LHFQLNFPDLQPGAPMNEAQLFQVPHGQAPSMLPPQOQPSQVPSQLPPL                                                   | PPQLPSVL--TPPLNQLPPQMPHFQLIE-AQPGWEQQ--     |
| AMBN_sturgeon   | MFPSLNLPQAQPLPPKKTGQOQPPQOQSQSPSLRPPQOQPOQPPQOQPPQOQ                                                | YQOQPPQOQPOSSPOLPPNFQVVEYLPGLQOE-RLINRNQQ-- |
| AMBN_gar        | MFPSLNMPHSTGLQPPQIPQFTGVQLPHNTGLQPPQIQAPSQTPPTSQAP                                                  | SQLPQOQPSQLPHQMTPSQOQVEYQOQGLQOM-QLVHAEQQ-- |
| AMBN_zebrafish  | ISPNDLKESSLVSG--DMQO                                                                                | FOQPSRMLSGLHOOVNEPNASQPNP                   |
| AMBN_medaka     | VAPNTHARMLQGGGA--TORIHVQSTNHKPEVQTPAFLSPIEQAQSGIQOQPPDQAVLEPSFSLFOHTWYQGGSTINEMFQNVPPFLPANHLTLGQLPL | STAVRQHEAQF                                 |
| AMBN_tilapia    | VNSNVRRPQLLQGGETATQGAQHVAANQKPESETPASISPSVQFO                                                       | AGGLQOQDPPQPI                               |
| AMBN_fugu       | TGEPVSHFESVIIQGE-ATQGTDNEDYHTPAPPSSQVQOQALSLOQDPRGGFHLI                                             | SE-QFLWSVVGGAFTF                            |

  

|                 | exon6                                                                           |                                                       |
|-----------------|---------------------------------------------------------------------------------|-------------------------------------------------------|
| AMBN_human      | YEYSLEVVHPPPLPS-QESLKPQOQGLKPEFLQS--AAATTNQAT-ALKEALQPP                         | IHLGHLFLOEGKLELVQQRVAPSDKPPKPE                        |
| AMBN_platypus   | YEYALPVHPPPPRPS-QRTLOPQOQPKQNAFLPF--TVAFSAQGGPPAQNGD                            | QOPIILHLOPPLQOQEKPSVQEQVAFPKRPPKPE                    |
| AMBN_caiman     | YEYAMPVHPPPLPSLOTPLQOQPRIQANPSLRSSTLPTKQGGIQLNEALLP                             | VOVGQPPLOQOQGLFGIQOQLIPADKQL-C                        |
| AMBN_Anolis     | YEYAMPVHPPPLPSLOTPIQFAEPRLEPEQEFFQITNLIPTRVQIPRYAIP                             | QPSIQOQTFQOQVEAHPVVDQOQQLPAERQTHC                     |
| AMBN_Xenopus    | FEYALPIHPPLPGAQSEFAQTEKPGQHAQNMPE                                               | ---QOQAAASTDQVSHQPSLPLGFEILOQADPAMMPKGGPADGQI-QTVALYM |
| AMBN_lungfish   | YEYALPVHPPQOQPPQPHLPPQOQPEVSPQOQPT                                              | -----DQOQPSAQPSQOQGHSPQ                               |
| AMBN_coelacanth | YEYTLPIHPEVQF-QQPPAQOQPPVQOQIPT                                                 | -----QKTEQOQGOQPEVQSPVQOQHQPQLDLOQL                   |
| AMBN_bichir     | YEYDAPVLLAHGPDQQSEALPTAGNVVVPATQOAVVVEQOQVQOQCGGT                               | QLNQPGQTPSAQGHLEVPQOQPMFTFGFVPEVPEOT---AKQOQ          |
| AMBN_sturgeon   | YEYESPVLFHQVPPQOQSTAVPATQOASVQPAQOQOQPGRQDQPEHQIQIPNAPGQOQPSHQ                  | -----GQOQPIQFTFGFLEMMHYQVQOQOTQO                      |
| AMBN_gar        | YEYETEFLLEQVPEQOQTEQVQATAGSAPATPTAPAAPROQOQAGQOQHEQAQAPQPGVQVLEQENIQIQGTGINGQOQ | -----GTQGHQPTLPAQLPPE                                 |
| AMBN_zebrafish  | -----                                                                           | -----                                                 |
| AMBN_medaka     | -----                                                                           | -----                                                 |
| AMBN_tilapia    | -----                                                                           | -----                                                 |
| AMBN_fugu       | -----                                                                           | -----                                                 |

B (continued)

|                 | exon7         | exon8        | exon9         | exon10                           |
|-----------------|---------------|--------------|---------------|----------------------------------|
| AMBN_human      | LPRVDFADPQGPS | LPGMDFPDQGPS | LPGLDFADPQGST | IFCIAR-LISHG-----PMPQN--KOSP     |
| AMBN_platypus   | LPALDFTVQLROS | -----        | -----         | IFPIAOKLISOG-----PROKA--EOSP     |
| AMBN_caiman     | LPALVYSGHLGOV | -----        | -----         | MYFIVHQLVHOG-----PMQEQ--QCPA     |
| AMBN_Anolis     | -----         | -----        | -----         | IYPALH-GTQOD-----PSQQL--QQS      |
| AMBN_Xenopus    | -----         | -----        | -----         | YQTIMNKLLQQGAGETIIPD-PAGTLEVNQQH |
| AMBN_lungfish   | -----         | -----        | -----         | IEVEIF--OTFOVAQQP-QPFQOM--IFPA   |
| AMBN_coelacanth | -----         | -----        | -----         | VSPSNGNAVQTPQVTQQPQQG--QQPQ      |
| AMBN_bichir     | -----         | -----        | -----         | -----                            |
| AMBN_sturgeon   | -----         | -----        | -----         | -----                            |
| AMBN_gar        | -----         | -----        | -----         | -----                            |
| AMBN_zebrafish  | -----         | -----        | -----         | -----                            |
| AMBN_medaka     | -----         | -----        | -----         | -----                            |
| AMBN_tilapia    | -----         | -----        | -----         | -----                            |
| AMBN_fugu       | -----         | -----        | -----         | -----                            |

  

|                 | exon11                                                                                                |
|-----------------|-------------------------------------------------------------------------------------------------------|
| AMBN_human      | L--YPGMLYVPF-----GANQL-----                                                                           |
| AMBN_platypus   | L--YPELVYVPF-----GANQQ-----                                                                           |
| AMBN_caiman     | L--HPALFYMSY-----AANQG-----                                                                           |
| AMBN_Anolis     | I--YPSLYMPY-----VANQG-----                                                                            |
| AMBN_Xenopus    | P--YPLGFFMQY-----GGGPG-----                                                                           |
| AMBN_lungfish   | F--E--YFYQF--FVQQGQOPM MFPFENSPP-QPFGQQGQYFVMLF TSDILPFVIQQPDIQQPQLPQVPP TNSFLP SIVQQGGQQQQQQQQQQQPQQ |
| AMBN_coelacanth | IQFFFTYEYLQMLPQVPGQQGQQPG GYPPYSFFP--ALACQPLDF-----QQQQQQQQQQQQQQQQQQQQQQPQQQP                        |
| AMBN_bichir     | -----FSGYGLLL-PASFPPQEV-----QEGLEQQPPQQQPSQS                                                          |
| AMBN_sturgeon   | -----FPGYSFLI-PAAPFQQ-----QAQPGQEQQQQ                                                                 |
| AMBN_gar        | V--FNTF--GILPIMPPQACDEQQ FPGYGVFF-NTAFPCQEV-----QPPQAAQPGAPPQQQ                                       |
| AMBN_zebrafish  | F--F--YYPILGQSS---RNET FS-YGVSAFQHAASQQYFANAAPALREARE-----QQGNAHQMRQFPQQQQQQQQ                        |
| AMBN_medaka     | M--FPPYGFYPLFAPPY---GNQM FSPYGFPSIRESF FLOAPTQQLNNQAPPAENVV-----PAGAARQQTQQ                           |
| AMBN_tilapia    | I--FPPYGYLPLFSSPY---GNQL FSPYGYPMILESGLPQIPANQLNSPVLPAENAGVAV-----DPSIDATQGIQQPQQQLQQQ                |
| AMBN_fugu       | I-SSPR-SFTPLISEAF---INQL-----                                                                         |

  

|                 | exon12                                 |
|-----------------|----------------------------------------|
| AMBN_human      | -----N-APARLGIMSSEEVA                  |
| AMBN_platypus   | -----NAAPARLGKVSSEEMF                  |
| AMBN_caiman     | -----G-APARLGIVSSEEML                  |
| AMBN_Anolis     | -----A-APARQGVISSEEMQ                  |
| AMBN_Xenopus    | -----G-PPARLGAMSSEET                   |
| AMBN_lungfish   | GFPFIQFYLAALGHQ-NLPPQ V-----QGAISSEETC |
| AMBN_coelacanth | PPPSFVYVPLPARQEQLPQG G-FPNTFGMSSEEMQ   |
| AMBN_bichir     | MFPOLVYVPLQV---GVMA G---AIGVSSSEEMQ    |
| AMBN_sturgeon   | MYPOLVYIQLOP---GMAG G---AGVSSSEELQ     |
| AMBN_gar        | MIPQILYLIQCPM--RSAMG G---GGFGASSEEMQ   |
| AMBN_zebrafish  | FQPIF-YMVEQMP---QRM A---GSYGGLSSEELQ   |
| AMBN_medaka     | QNPPIVYMLQ-----QPM N---PAIGGLSSEELE    |
| AMBN_tilapia    | N-PQILYMLQ-----QPM S---SELGLSSEELQ     |
| AMBN_fugu       | -----D--STLSFSEEFEE                    |

B (continued)

exon13  
 AMBN\_human GGRE-DPMAYGAMFPGFGMRP-----GFEQMPHNPAMGGDFLEFDSEVAATKGPEN-----EGGAC---GSPMPEANPDNLENPAFLTELEPAPHAG-LLV  
 AMBN\_platypus GGGG-EELAYGSIFFGFGSMRP-----GFGAMQINPALGKDFLEDDSETVAGK-PPG-----CGEVL---GSRDGAIPAGHPNPGLLPERISRLRSGAALT  
 AMBN\_caiman GGRG-GVFAFGAMIF-----GFRGMQDPAIQGDFTEDDNPATAHN-PAI-----CGGANCGFSRGRSFAVNRAGHSAILLPDGTAGHEG----  
 AMBN\_Anolis GGGF-GAPAYRAFPPDLFAMDT-----RFGNSPLN--CPGDYTVEDDTLGLITECPDV-----KGGANA-----GANPSGKGNNAVLLDGTGGALP---  
 AMBN\_Xenopus GGRTGAAHAFSSLYPGLLGMP-----RLESHQDPAIQGDFTEDDSEVAGQK-PTG-----CEVSCG-----PIESPQGVGSSIMIPLGLESPGCG-GET  
 AMBN\_lungfish GFPIQFYLCALGHQNLQONVQGAIEEIQANRAAGAAAAAVFNSMFAFAANYFGFGSVAARFISVDATIEDDHFVVGQGEQAGCGTGTGFGVGNLNAVGT-----PSSPAVNIPIPEGNPTG  
 AMBN\_coelacanth AAGGGLS-PALGGIIPGYVGNIPG-FGAGVPSFGGSVPGAANIPMF-----GFNTAVNPAGCGGVTVEDDPPPAEK-PASFGN-SPGT-GANPSGQGGSAFNPENPTGQVGSIPNPQANPPPSEGTPS  
 AMBN\_bichir QSAGDMS-PEMAGFIPGFATPT--FGGGPNFVGSQPAVGGTVFV--AGGI--PTAQGTQPGVLEEV-----TAQGTQPGVLEEV-----KLEIPV  
 AMBN\_sturgeon AAGG-IS-PGFAGFIPGFAGQA--FGGSIPSFGGSVPGAEGSIF--AGGV--PTGQGTNP-VVPEA-----GLPTVEIILPA  
 AMBN\_gar AAGG-VA--GFGGFVPGFAGSG--YGGFGGTVPGTE--GVFPTGQGIIEVAPDAGLF-PVQGG-----SPTAFVAFPA  
 AMBN\_zebrafish NMGR-VNMHLPAIRGNVFVSGPQTVVPIGFVRPPNEFPATGMTYPGITELQQPSIIIAVPPSRDAIEATGGSH-----PNSAVLESRISGTDQRDRAPCVIAEIEPLTNSFALD--SGHGAFISADVE--  
 AMBN\_medaka MQAK-LNOMSV--YSVLTNLPAGAGFVQPEAQAGLTHPEQGGVQPAVGTSA-----AGVRSIQGACSGSLLNSNSVFAQVKTAVEANAVQTQNHAK  
 AMBN\_tilapia MAAT-MGQLGV--YMNVLTNQFAGAVQPEAQAGLTHPEQGGVQPAVGTSA-----AGAQPIKALPC-SGSGFNASGFSAG-LAGPDAATAQTAEFPQ  
 AMBN\_fugu -----VNI--YLSTALTDPSAATVQVVKQAAGL---QNLVSTVGTFS-----TGAFQNC-VFTSSGPPMDTNGVAVG-SEKFAEEMATVQHEVE

exon13 (continued)  
 AMBN\_human -----FLKDDIPLPRDPSGKMKGLPSVTPAAVDPLMTEPELADVYRTYDADMTTSVDFQEEATMDTTMAFNSLQTSMPGNKAC-----EPEMMHDAWHFOEPP  
 AMBN\_platypus -----FSDFIPIHRQGGPAGQSKLPPGVTPPPADPLMTPEGSDLEFFEGDGTPLGLQREALDTTMTPTDQSTYMEGNEAQ-----QMQVTDQDQVQFQEP  
 AMBN\_caiman -----FLPNINDMPGQGVNVPVGG-RGTPEVTPATAPELTQGIQDSFMTFGAEGTVPLGIQKEVTADPTMFPPEAQHTLMAGNGAE-----QEQVMQDVWHFOEPP  
 AMBN\_Anolis -----NANSHLFSFAGCSQGLSGLAQATAAPHATQG--EFLPLDAADES-----MPLDATMFPD-LYTSNVGNEAG-----LAQVGDQDAWHFOEPP  
 AMBN\_Xenopus -----VFPFNINSFNMGFNEQSKIPEPGVTE-ANAPRLTHDTGAGYVPEFALDDTMEFGIQRENVISGDI TRANNAKGIESEIMQH-----EVHLDQNHNNYFOEPP  
 AMBN\_lungfish QIGNPQIIP-----QSNPSSFGGQIMQNPDINPSNQLPATPADI PAASAGNPSAATASFNEGGL-----FVIYYEGLNHFAARGPWFPP  
 AMBN\_coelacanth VQGVPPQPAPEGNLPNLEGN-----PTGQVGNQPAPOSKGPMGGATTPASTKNLTPANVPGGPEGGIVPFAGDITASAAARKVPTIIPAFFNPSLGGTATENNNAVRSNAAGVLPPIVVNEGLN-PLGGGWIIYP  
 AMBN\_bichir GQG-----GSPTIPEVPIIGQGNMPEKTEGAVPAQGGQQPSFQMKLENMTDGVLLDGVVPEEGTVQSFAPGSTQDTIGKKSPTAAPDPAATVE-----KAQAPTPEEVEMPDLDYDTANFYLHP  
 AMBN\_sturgeon GQG-----GGPTIPEVPIPTGQSSLP-----VMSKTNQPAPOSKLFTVGLTTPAVWRMLTPEGNSFAAA.  
 AMBN\_gar GHGNLPPTPGS-TVFV--QGS-----NNOFAPQSRDPAFSMTTPAGVRAATVGNPPAAAAAGTACPNAAAAATAAAE-----RVHVNHAEARNIPADDEMPQADDYRAE-FIYFP  
 AMBN\_zebrafish -----NNOFAPQSRDPAFSMTTPAGVRAATVGNPPAAAAAGTACPNAAAAATAAAE-----RVHVNHAEARNIPADDEMPQADDYRAE-FIYFP  
 AMBN\_medaka SLPTNRNLVRSKAN.  
 AMBN\_tilapia LQPMQETLV.  
 AMBN\_fugu AEELLPLTQTRSV.

C

|                 | exon3                                                                                     | exon4                                  | exon5                                  |  |
|-----------------|-------------------------------------------------------------------------------------------|----------------------------------------|----------------------------------------|--|
| ENAM_human      | ---MK-ILLVFLGLLGNSVAMP                                                                    | MHMPRMPGFSKKEE--                       | -----MMR-YNQFN--FMNGPH-                |  |
| ENAM_pig        | ---MK-ILLVFLGLLCYSAAMP                                                                    | MQMPRMPGFSKKEE--                       | -----MMR-YGHFN--FMNAPH-                |  |
| ENAM_platypus   | ---MK-SFLLFLGLFGASTAMP                                                                    | MHMPRMPGFGKKEE--                       | -----MMF-YGQYN--FMNSPH-                |  |
| ENAM_Anolis     | MQRMK-QLLLYLCLIGTSWAVR                                                                    | LRKPRKAGFGKKEE--                       | -----MMQ-YGPFQ--YLNSPQ-                |  |
| ENAM_Xenopus    | ---MMV-PIILLCLFLISSNSVF                                                                   | MHF--SHMSNKEE--                        | -----GME-YGPGY--YQN-PQ-                |  |
| ENAM_coelacanth | ---MK-TLLLVCLLGTSLAGL                                                                     | ARL--VRKARNKEE--                       | -----MVQKFTSYNRHMFPQORL                |  |
| ENAM_bichir     | ---MK-RGLLLLCLFLTALAFV                                                                    | V----GVALAAQEE--                       | -----ALMCO-RWNALLGAFQOO                |  |
| ENAM_gar        | ---MK-IALLVLCFLGTSLAFV                                                                    | I----VPGAFIDHE--                       | -----AKMOOYRWYG-APQOQRO                |  |
| ENAM_zebrafish  | ---MK-AVALLMCLLGSLSAAP                                                                    | -----APDGGNE--                         | QAIAASHANTALQLMELYRMLGQLRQQ            |  |
| ENAM_trout      | ---MI-SVLLMCLLGFSLAAP                                                                     | -----TPDGGDE--                         | Q-VAAHANEALRWEMELYRMYGSL---            |  |
| ENAM_fugu       | ---MVTILVALMVLLGTAWSAF                                                                    | -----ALGEEAEEN--                       | ---VAAHANALRWMMHYRLY---QOO             |  |
| ENAM_medaka     | ---MK--LFVFLYLIISASAAF                                                                    | -----APDGGSE--                         | ---VAAHANAALRLMELFRMY---QOO            |  |
| ENAM_tilapia    | ---MK-QLVFFICLLVSTLAAP                                                                    | -----APAEISE--                         | ---IAAHANEALRWEMERYLY---QOO            |  |
|                 |                                                                                           |                                        |                                        |  |
|                 | exon6                                                                                     |                                        |                                        |  |
| ENAM_human      | M-AHL-GPFFGNG--LPQQFPQYQM--                                                               |                                        | PMWPPPPNT-WHPRKSS-----APKRHNKTD-       |  |
| ENAM_pig        | M-AHL-GTLYGNMQLPQFFPQYQM--                                                                |                                        | PMWPPPPNK-KHPKPS-----ASKQSKTD-         |  |
| ENAM_platypus   | M-AQL-GPLYGYLQLPQFPQYQM--                                                                 |                                        | PPWPPPPNG-WPAQNGGPPQ-----GGKPAKPG-     |  |
| ENAM_Anolis     | L-TQLAASLYGYRSGFPQMVFPQQ--                                                                |                                        | PTFPLQRFYL-WPQMPVHQS-----ARPPQKAH-     |  |
| ENAM_Xenopus    | M-PGI-GSMYGLG--FPHYSMIQL--                                                                |                                        | QCAFGRQPS-WLQNIARTQIHKETIPLNLPRFHLQPV- |  |
| ENAM_coelacanth | QVMQL-RSLYGNAPQRL-MYEQQLQQQQQRKLLVARLLAQALKQTKQSRQAQNAAPQLQVQKQQLQPLQEPQVQQ-----KQKQQQLLQ |                                        |                                        |  |
| ENAM_bichir     |                                                                                           |                                        |                                        |  |
| ENAM_gar        |                                                                                           |                                        |                                        |  |
| ENAM_zebrafish  |                                                                                           |                                        |                                        |  |
| ENAM_trout      |                                                                                           |                                        |                                        |  |
| ENAM_fugu       |                                                                                           |                                        |                                        |  |
| ENAM_medaka     |                                                                                           |                                        |                                        |  |
| ENAM_tilapia    |                                                                                           |                                        |                                        |  |
|                 |                                                                                           |                                        |                                        |  |
|                 | exon6 (continued)                                                                         |                                        |                                        |  |
| ENAM_human      | QTQETQKPNQ-----TQSKKPP-QKRFL--                                                            |                                        | KQPSHNOQOPE-----EEAQPPQ-               |  |
| ENAM_pig        | PAPESQKPNQ-----PQPKTPT-PKQPL--                                                            |                                        | NEPSPPTQOPE-----EETQTPQ-               |  |
| ENAM_platypus   | QSNTKQPNP-----SQPKKPP-QQPPF--                                                             |                                        | KQAAKQPAQPSKET-----EETRQPPQ-           |  |
| ENAM_Anolis     | QTFVPKKPNSRPRLKPRLVFPQPR:QQPQPKIHLPAKQPF                                                  |                                        | ---VATHRQOQPTPIQPPKGEKQPOQ-            |  |
| ENAM_Xenopus    | QSLSQLPAP-----FVQQQLNPPQSKSNYVTKQF                                                        |                                        | HQPLQLPPAFD-----QQAQAPM-               |  |
| ENAM_coelacanth | QAQNLKNVLP-----QQPQRLQKQSPQQLQHQKQKPPQQAQKQEQSRQR--                                       |                                        | FSRKQPPQKDLQQL                         |  |
| ENAM_bichir     |                                                                                           |                                        |                                        |  |
| ENAM_gar        |                                                                                           |                                        |                                        |  |
| ENAM_zebrafish  |                                                                                           |                                        |                                        |  |
| ENAM_trout      |                                                                                           |                                        |                                        |  |
| ENAM_fugu       |                                                                                           |                                        |                                        |  |
| ENAM_medaka     |                                                                                           |                                        |                                        |  |
| ENAM_tilapia    |                                                                                           |                                        |                                        |  |
|                 |                                                                                           |                                        |                                        |  |
|                 | exon7                                                                                     | exon8                                  |                                        |  |
| ENAM_human      | AFPPFGNGLFVYQPPWQI--PQ                                                                    | RLPPPQY-----GRPPIQNEE--GG              |                                        |  |
| ENAM_pig        | AFPPFGNGLFVYQPLWHV--PH                                                                    | RIPPGY-----GRDPTQNEE--GG               |                                        |  |
| ENAM_platypus   | MYPPFGNGFFPQLOPWQI--PP                                                                    | QMPPGY-----GRPPGQNEE--GG               |                                        |  |
| ENAM_Anolis     | AFPP-----HQQPWQF--PQ                                                                      | RMPP-----GRPPNEE--G                    |                                        |  |
| ENAM_Xenopus    | MFPFSSNIMNRYQYVW--QQ                                                                      | PFMHGF-----GRPPNEE--GN                 |                                        |  |
| ENAM_coelacanth | VYPSQGYIRMLPQMLWQQRQQQ                                                                    | PV-----GRRKQGGYEEQGMG                  |                                        |  |
| ENAM_bichir     | GNYP-----KVVYIQLSPPE-MAG                                                                  | MGNR-----AAPAEQE--GG                   |                                        |  |
| ENAM_gar        | QDFP-----KVVYVHLPP--MAG                                                                   | MGPNT-----AAPAEQEA--GA                 |                                        |  |
| ENAM_zebrafish  | GY-GA-----VAG-PQL--P                                                                      | GFFFNPAFA-----PTGDGDEE--VA             |                                        |  |
| ENAM_trout      | GQ-LA-----ABA--QP-PLMN                                                                    | KFFYPSPMN-----DEE--A                   |                                        |  |
| ENAM_fugu       | AMLQN-----PFV--FPAGRAQ                                                                    | VNAAPVQPLAVAPQAAVAHPAAVAHPAAVGDDEE--AQ |                                        |  |
| ENAM_medaka     | GLA-N-----PFL--PAAGAH                                                                     | INV-PVQPA-----AATPAGDADEE--AE          |                                        |  |
| ENAM_tilapia    | GIVQN-----PFV--PSANSF                                                                     | VDAAPACPADVPE-----PAHVQVGDQEE--TE      |                                        |  |

C (continued)

ENAM\_human exon9  
 ENAM\_pig  
 ENAM\_platypus  
 ENAM\_Anolis  
 ENAM\_Xenopus  
 ENAM\_coelacanth  
 ENAM\_bichir  
 ENAM\_gar  
 ENAM\_zebrafish  
 ENAM\_trout  
 ENAM\_fugu  
 ENAM\_medaka  
 ENAM\_tilapia

ENAM\_human exon9 (continued)  
 ENAM\_pig  
 ENAM\_platypus  
 ENAM\_Anolis  
 ENAM\_Xenopus  
 ENAM\_coelacanth  
 ENAM\_bichir  
 ENAM\_gar  
 ENAM\_zebrafish  
 ENAM\_trout  
 ENAM\_fugu  
 ENAM\_medaka  
 ENAM\_tilapia

ENAM\_human exon9 (continued)  
 ENAM\_pig  
 ENAM\_platypus  
 ENAM\_Anolis  
 ENAM\_Xenopus  
 ENAM\_coelacanth  
 ENAM\_bichir  
 ENAM\_gar  
 ENAM\_zebrafish  
 ENAM\_trout  
 ENAM\_fugu  
 ENAM\_medaka  
 ENAM\_tilapia

ENAM\_human exon9 (continued)  
 ENAM\_pig  
 ENAM\_platypus  
 ENAM\_Anolis  
 ENAM\_Xenopus  
 ENAM\_coelacanth  
 ENAM\_bichir  
 ENAM\_gar  
 ENAM\_zebrafish  
 ENAM\_trout  
 ENAM\_fugu  
 ENAM\_medaka  
 ENAM\_tilapia



C (continued)

exon9 (continued)

ENAM\_human KHSSYQPAVYPEEIPSP-A---KEHFPAGRNTW-----DHQEISPP---FKEDPGRQEEHLPHPSHGSRGSV-FYPEY  
 ENAM\_pig KHSAYQPV-YTEGIPSP-A---KEHFPAGRNTW-----NQOEISPP---FKEDPGRQEEHLPHLSHGSRVHV-YYPDY  
 ENAM\_platypus KQKPFHPV-TSERTPR-----EPSPTKPKQR-----TSPEPPPP---LEEGPGRQDKSLTYPPISPRSGI-PYPDH  
 ENAM\_Anolis REQPFNHI-DQKR-----GQFLSAQTPTW-----NNREASQL---FQEAPPRQSSMYSSGSFNQREMP-TYS GK  
 ENAM\_Xenopus KLSVFNNG-DNSGN-INTAHIKSEDLFRGGEFFQHNGENAALYQKEGTASDIDGTASDIDGTAYDIGTAYDIGTATTGQQLES IYLVKHFPTNHFQVYGDN  
 ENAM\_coelacanth SGQESISPNSRYNPSGQEIHPNSRYNPSGQENIPSNPNYNPSDQGRMLPHHEVNLPNKKS IQPNSGYHPSGQKNLSPRHMYPNSDHGSPNQNH EIDPL  
 ENAM\_bichir -----VTSSPSGNNNAVLNIPYYPSNGG-----NINPV  
 ENAM\_gar -----TTPAPMGKSPALNIPFSPSEGA-----KRNPS  
 ENAM\_zebrafish -----  
 ENAM\_trout -----  
 ENAM\_fugu -----  
 ENAM\_medaka -----  
 ENAM\_tilapia -----

exon9 (continued)

ENAM\_human N-----PYDPRENSPYLRGNTWDERDDSPNTM--GQKESPL---YPI-NTP-DQKEIVPYNEEDPVDPTGDEVFPQNRWG-EELSFKG-----  
 ENAM\_pig N-----PYDPRENSPYLRNTWYERDDSPNTM--GQPENPH---YPM-NTP-DPKETI PYNEEDPIDPTGDEHFPQSRWDMEELS FKE-----  
 ENAM\_platypus H-----PYDPK-----GTWDEGNEPTPSS--GPAEQFGRQSPCSPRM--GQRGEVYNEEDPVDPTGDEPNLGGPWE-ETANGKE-----  
 ENAM\_Anolis KSYNQYTHPPFP-----RAWEDREHSPTISPSDQRESSP---YPP-VSPSDQIQRNYY--RRIQPE-YEPYSRQDPWT-REQHLHD-----  
 ENAM\_Xenopus N-----PKNPS-----HLLSNTWQKKPDQ-----LESFR--N---NLL-GQKEIYLYPDTELYHQTNNELPLGKHWD-NEIDFSAVQFENPGS  
 ENAM\_coelacanth GQRHQSSPVNTLVQEDMSHYPRSNPLRQGGNSPNHETFSHGQKYSHYDRSNHVRGKGNSPCHGSHSPSQVIHHKQPKGNSQIH DENPWGQEGQMS  
 ENAM\_bichir GMRKTP-----VKNGC-----  
 ENAM\_gar GIRKPP-----VQVPC-----  
 ENAM\_zebrafish -----  
 ENAM\_trout -----  
 ENAM\_fugu -----  
 ENAM\_medaka -----  
 ENAM\_tilapia -----

exon9 (continued)

ENAM\_human -----GPTVR--HYEGEQYT---SNQPKEYLPYSLDNPSKPREDFYSEFYWPSPDENFPPSYNTASTMPPPIESRGYYVNN AAGPEESTLF  
 ENAM\_pig -----DPTVR--HYEGEQYT---SNQPKEYLPYSLDNPSKPREDFLYGEFYWNPEENFPPSYNTAPTSSPVESRGYYANNAV GQEESTM  
 ENAM\_platypus -----DPS-R--YHKSPOYPQSRATEPQDYPPYPEGGLEK-HRDFPYGDFYPRGPEDNLPYNGADQ--LPVEGRGYYTHDAV GQGGPLQF  
 ENAM\_Anolis -----PD-N--QYSNSPYN---PTHHQTYQKYTTENPPSEISNLPYRKINQWQEEHS PVH-TAGHL-RQMNVPYRTNSKFEQGE-RKF  
 ENAM\_Xenopus STYYMKDSQRQKQWPTASNNRVELDRQP---TDQPKYLLISKLD-----PAKNTDVS--TFTTNEPMAQNGYITNQEAY---LQS  
 ENAM\_coelacanth NAGRIPSNRGDSSPYPLFLSENRESSPYLASKPVNQGQISPNHEVYSSAQGGNRPYTGMIPTDKI I SPNHGPPSSIQGDL SQNYRGYQSGKERNQPYT  
 ENAM\_bichir -----NMG-----NHGPTTV-----  
 ENAM\_gar -----NKG P-----HGPY-----  
 ENAM\_zebrafish -----  
 ENAM\_trout -----  
 ENAM\_fugu -----  
 ENAM\_medaka -----  
 ENAM\_tilapia -----

exon9 (continued)

ENAM\_human PSRNSWDHRIQAQGRERRPYFNRNIDWQATHLQKAPARPDPQKGNQPPYNTPAGLQKNPIWHHEG-E-NLNYGMQITRMNSPEREH-----SSFPNF  
 ENAM\_pig PSWSWDPRIAQGGQKEGRPYLNRNFWDQSTNLYKTP TSSPHQKENQPSNNSPAGLQKNPTWHEG-E-NLNYGMQITRLNSPERDH-----LAFPDL  
 ENAM\_platypus PSRDSWDWGLRSAAQERRAPYDERDSWDHAINS---PKSTAGATETLSPSHSVPAGIRGKPHHEESV-D-WSYRGGQVSDLGVP EAE-----PALMEP  
 ENAM\_Anolis QNVGSGSPQQRNTFQEE-AQYAERTWVPQRV-----DPSAQKETAPYYNIYSTDFRGNPTHVEDRERI IHMNAPISTENAPRRRH-----YLD RMG  
 ENAM\_Xenopus PNN--KSPFIFNKPSTDGILYIPIDELHDS-----QNNPVHLKLT P-----YSKAHSENHSPGVFRSLQEV  
 ENAM\_coelacanth EVIPRGQKSIYSAPSGQRGENSENLRINPSGENSENLFYPERKPSGKESDLPSYRVYVKGQGENSPYSQPV-PSSQRIMTSDPLL NQSTQKGTMPYFTLNS  
 ENAM\_bichir -----EPVAPSAGNSEIPSFGE-----GILMA-----  
 ENAM\_gar -----GNGE-----QPGFVDPMNPDAEG IILA-----  
 ENAM\_zebrafish -----  
 ENAM\_trout -----  
 ENAM\_fugu -----  
 ENAM\_medaka -----  
 ENAM\_tilapia -----

C (continued)

exon9 (continued)

ENAM\_human IPPSYPSGQKEAHL-----FHLS-QRG-SCCAGSSTGPKDNPLAL-----  
 ENAM\_pig IPPDYPGGQKESHV-----FHLS-QRG-PCCAGGSMWPKNNPLAL-----  
 ENAM\_platypus VARSDPADPREASS-----YPVAVARS-SCCAGGSPGPRDVLAPPDYPLALPGYLPLDPLDYPPLDRPDYLPAPRDYPPP  
 ENAM\_Anolis YSDDYPKERRMIT-----SQST-ANQ-LCCADDSFMPRENRLAP-----  
 ENAM\_Xenopus NFNLYPSSLRRQSLNPRKTGHYSCITPLTGVDPTLEHSN-ALILVCCKLNDM-GQSHPSAN-----  
 ENAM\_coelacanth PGQKTNSPYISENPSDQRGTSFKNRIYPAGQRRARLPYPASSVFSQRDNHPIHGTFNPSGQEDIPPNQDTNLLSKIGFTTPTLENPSEQRQSGFCPRNNQL  
 ENAM\_bichir -----AAEAGSDGEGRT-----  
 ENAM\_gar -----AADA-----  
 ENAM\_zebrafish -----  
 ENAM\_trout -----  
 ENAM\_fugu -----  
 ENAM\_medaka -----  
 ENAM\_tilapia -----

exon9 (continued)

ENAM\_human -----QDYTPSYGLAPGENQDTSPLYTDGSHTKQTRDII-SPTSILPGQRNSSE----KRESQNPFRDGVSTLRRNTPCSI  
 ENAM\_pig -----QDYTQSFGLAPGENPDTSIGYAEDSHIKYARQTV-SPTSIVPGQRNSSEKILPGESQNPSPFKDDVSTLRRSTPCSV  
 ENAM\_platypus DTPNYSPLDTPDYPPHYPLAPQDYSSPLGLSLWELQVGGPRSPGGSRSHVQQA-SPVGYPAIRRNGETEAPTRREEPAPSRDGLA-PGRSPPCSL  
 ENAM\_Anolis -----LRSAPQFRHALWEAKESST-YPDGSHANYVRHAH-SPAGIQA--NNPLKNGGREQEELGAFRVENAGSEKSLPSCSN  
 ENAM\_Xenopus -----EDNVHHLKVVVLENEYKESVP-HQDQTHRQHTRDVIESPKFSI--Q-NNVMTVRPNSSNNHDNIQSSRGKSSDSVPCTS  
 ENAM\_coelacanth CQRNSNPDFKGNSPITERKSLGWRERTHSVGATPIHGNDHPDSFSPRKSQFPADNFPYQAGNPETPRRNQFVDRENMPITRDSPLGSEGNMMPKPSLSE  
 ENAM\_bichir -----  
 ENAM\_gar -----IHGDS-----  
 ENAM\_zebrafish -----  
 ENAM\_trout -----  
 ENAM\_fugu -----  
 ENAM\_medaka -----  
 ENAM\_tilapia -----

exon9 (continued)

ENAM\_human KNQLGQKEI-MPFPEASSLQSKNTPCLKNDLGGDGNVLEQVFEFN-QLNERTVDLTPPEQLVIGTPEDEGSNPEGIQSQVQENESERQQQRPSN--ILHL  
 ENAM\_pig KSQLSQRGI-MPLPEANSLQSKNTPCLTSDLGGDGNVLEQIFEEN-QLNERTVDLTPPEQLVFGTDPKPEPRPEGIPNEMQGNESERQQQRQSS--ILQL  
 ENAM\_platypus RPRASPRAG-LAFPEAGLPPAKPAPCFKSRRLRGDVSVEQIILDPD-PPVAGNDGPAPGDLAVVPERDPGPGVIRGDP---EPGPEAGAPG--FQWV  
 ENAM\_Anolis SH-LSQDSKQEANLQRLFKFRNMPCHGNSNIRGDRHNPLAHLVGTGQSFGRGTLNLFPEQ-----FPQPHGIQSEALVSEDDGKEYAALG--AKRI  
 ENAM\_Xenopus KPSYEQNSE-YPY-----AFPKKQCS--YRGDADSYLPPSQDESISLKK--RFLASENVYML-ANTPEPDL-PDRRI--KDDGKVKKGIKLEIL  
 ENAM\_coelacanth -----RVNLFDRDNPALFHSHTTANNFEEGISTTSPKEMPPPGVDLTRHATKSWIPAAAGDMLPAPIKKA  
 ENAM\_bichir -----  
 ENAM\_gar -----RV-----  
 ENAM\_zebrafish -----  
 ENAM\_trout -----  
 ENAM\_fugu -----  
 ENAM\_medaka -----  
 ENAM\_tilapia -----

exon9 (continued)

ENAM\_human PCFGSKLAKHHSSTT-----GTPS-----SDGRQSP-----FDGDSI--TPT-----NPNTLVELA--TEEQFKS-----INVDP-  
 ENAM\_pig PCFGSKLANYHTSSI-----GTPS-----SLGRQDS-----FDGDI--MPT-----TPNSLAGLA--TGAQFQN-----INVDP-  
 ENAM\_platypus PCFGSETRDSK-SLL-----GMDGRSPWQREAGPIRAGVHRTRRDPGRGLWASDRGAFRGPQP--SPFIRFTALQDPPVGSRR--SGTTGSR-----LLVAP-  
 ENAM\_Anolis PCFGSWLKQYL-SNT-----EVPS-----DDQQRDP-----FYGENP--VPT-----RPNSIPPKPEPISSSFLS-----NGVEE-  
 ENAM\_Xenopus TCPQDQEIHTNKKATNIATRPTA-----SLLNHDK-----LSADAIP-----VLNTEQ  
 ENAM\_coelacanth PCFGDRTSPTS RDKIMSFGGSATLAGVRKAPPNGGDSMVLAVKPNLVPPASKTTVATDPKNDMALTSTLNKFPGTEKDALSAPPIAVNEDPRENRPDCVLLRD-  
 ENAM\_bichir PCRVHDTATAGKESNFYY-----  
 ENAM\_gar PCVVHDSPAQAEENHYYY-----  
 ENAM\_zebrafish -----  
 ENAM\_trout -----  
 ENAM\_fugu -----  
 ENAM\_medaka -----  
 ENAM\_tilapia -----

**Figure S1. Multiply aligned amino acid sequences encoded by matrix SCPP genes, Related to Figure 1.**

(A) Multiply aligned amino acid sequences encoded by *AMEL* and *SCPP5*, their chromosomal locations, and expression of bichir *scpp5* in the jaw and skin. Aromatic residues, negatively charged residues, and positively charged residues are shown in sky blue, blue, and brown, respectively, while Pro, Gln, and potentially phosphorylated Ser residues (potential pSer residues: Ser residues in Ser-Xaa-Glu or Ser-Xaa-pSer sequences, where Xaa represents any amino acids, are known to be phosphorylated in SCPPs.) (Kawasaki and Amemiya, 2014) are highlighted in yellow, blue, and green, respectively. Uninterrupted Pro-Xaa-Yaa (Yaa also represents any amino acid; PXY) repeats are shown with dashed underlines. The three conserved modules, the aromatic residue-rich region (YY), the Pro/Gln-rich region containing uninterrupted PXY repeats (P/Q), and the hydrophilic C-terminus (DE) are shown at the bottom. Unaligned sequence gaps are shown by dashes. Amino acid sequences were retrieved from GenBank (accession numbers for *AMEL*: NP\_873632.1 for humans, NP\_998965.1 for pig, reconstructed from GCA\_00002275 for platypus, XP\_003228746.1 for *Anolis*, AAC78133.1 for caiman, AAZ23149.1 for axolotl, NP\_001107153.1 for *Xenopus*, AYU58914.1 for lungfish, and reconstructed from GCA\_000225785.1 for coelacanth; accession numbers for *SCPP5*: AYU58917.1 for bichir, XP\_015200896.1 for gar, XP\_035273951.1 for eel, NP\_001138708.1 for zebrafish, reconstructed from GCA\_000180675.1 for stickleback, NP\_001032946.1 for fugu, reconstructed from GCA\_000188235.2 for tilapia, and reconstructed from GCA\_002234675.1 for medaka). Note that all teleost species used for multiple amino acid sequence alignments (A, B, and C) belong to different orders. In sarcopterygians, *AMEL* is located within intron 1 of *ARHGAP6*, while in actinopterygians *SCPP5* is located within a P/Q-rich SCPP gene cluster (Kawasaki et al., 2017). In *L. chalumnae*, locations of genes are shown as contig names (JHxxxxxx). Expression of bichir *scpp5* was detected in the jaw and skin that secretes the ganoin matrix on scales, but not in the skeletal muscle (negative control). Bichir *gapdh* (glyceraldehyde 3-phosphate dehydrogenase) was used as the positive control.

(B) Multiply aligned amino acid sequences encoded by *AMBN*. Cys residues is shown in red. See the legend above. *AMBN* in sturgeon, medaka, and tilapia has a small last exon, and the C-terminus is shown by a period. The amino acid sequences shown under exon 6 of human *AMBN* are encoded by two different exons in bichir, sturgeon, and gar (separated by an underscore). In a previous study, *ambn* was named *scpp6* in teleosts (Kawasaki, 2009). However, conservation of the amino acid sequences encoded by exons 11 and 12 (corresponds to exon 12 of human *AMBN*) between *AMBN* and *SCPP6*, the absence of the entirely untranslated last exon in both *AMBN* and *SCPP6*, the presence and locations of four potential pSer residues, and an equivalent chromosomal location of gar *ambn* and zebrafish *scpp6* (between *scpp3* genes and *scpp7*) implies the orthology of *AMBN* and *SCPP6* (Qu et al., 2015; Braasch et al., 2016; Kawasaki et al., 2017). In the present study, the orthology of *AMBN* and *SCPP6* was confirmed by a similar expression pattern during tooth development. Amino acid sequences were retrieved from GenBank (AAG35772.1 for humans, XP\_007667389.2 for platypus,

AAK92227.1 for caiman, XP\_016846623.1 for *Anolis*, XP\_002938667.2 for *Xenopus*, AYU58913.1 for lungfish, XP\_006011890.1 for coelacanth, AYU58915.1 for bichir, reconstructed from SRX424534 for sturgeon, AMD08894.1 for gar, NP\_001138709.1 for zebrafish, reconstructed from GCA\_002234675.1 for medaka, reconstructed from GCA\_000188235.2 for tilapia, and NP\_001032945.1 for fugu).

(C) Multiply aligned amino acid sequences encoded by exons 3, 4, 5, 6, 7, 8, and a 5' half of exon 9 of *ENAM*. The amino acid sequence of porcine 32-kDa enamelin (Tanabe et al., 1990; Yamakoshi et al., 1998) was underlined. Small amino acids (Ala and Gly) in the 32-kDa enamelin and corresponding regions are highlighted in grey. In the region corresponding to exon 6 of human *ENAM*, many small duplicate exons were identified in gar and bichir *enam* genes but are not shown in the figure. Amino acid sequence similarities in the portion located C-terminal to the 32-kDa enamelin (not highlighted or not shown in color) are low or undetectable between phylogenetically distant vertebrates (e.g., tetrapods and teleosts). In teleosts, *enam* was originally referred to as *fa93e10* (Goldsmith et al., 2003). However, sequence similarities in the 32-kDa enamelin and its N-terminal region encoded by *ENAM* and *FA93E10*, the absence of the entirely untranslated last exon in both *ENAM* and *FA93E10*, the presence and locations of four pSer residues, and an equivalent chromosomal location of far *enam* and zebrafish *enam* (immediately downstream of *scpp5*) imply the orthology of *ENAM* and *FA93E10* (Qu et al., 2015; Braasch et al., 2016; Kawasaki et al., 2017). In the present study, the orthology of *ENAM* and *FA93E10* was confirmed by a similar expression pattern during tooth development. Amino acid sequences were retrieved from GenBank (AAG43242.1 for humans, NP\_999406.1 for pig, reconstructed from GCA\_000002275.2 for platypus, ADJ67842.1 for *Anolis*, NP\_001139215.1 for *Xenopus*, reconstructed from GCA\_000225785.1 for coelacanth, AYU58916.1 for bichir, AMD08897.1 for gar, NP\_001139028.1 for zebrafish, CDQ64219.1 for trout, reconstructed from GCA\_000180735.1 for fugu, reconstructed from GCA\_002234675.1 for medaka, and XP\_003454248.1 for tilapia).

**A**

ISH: gar teeth

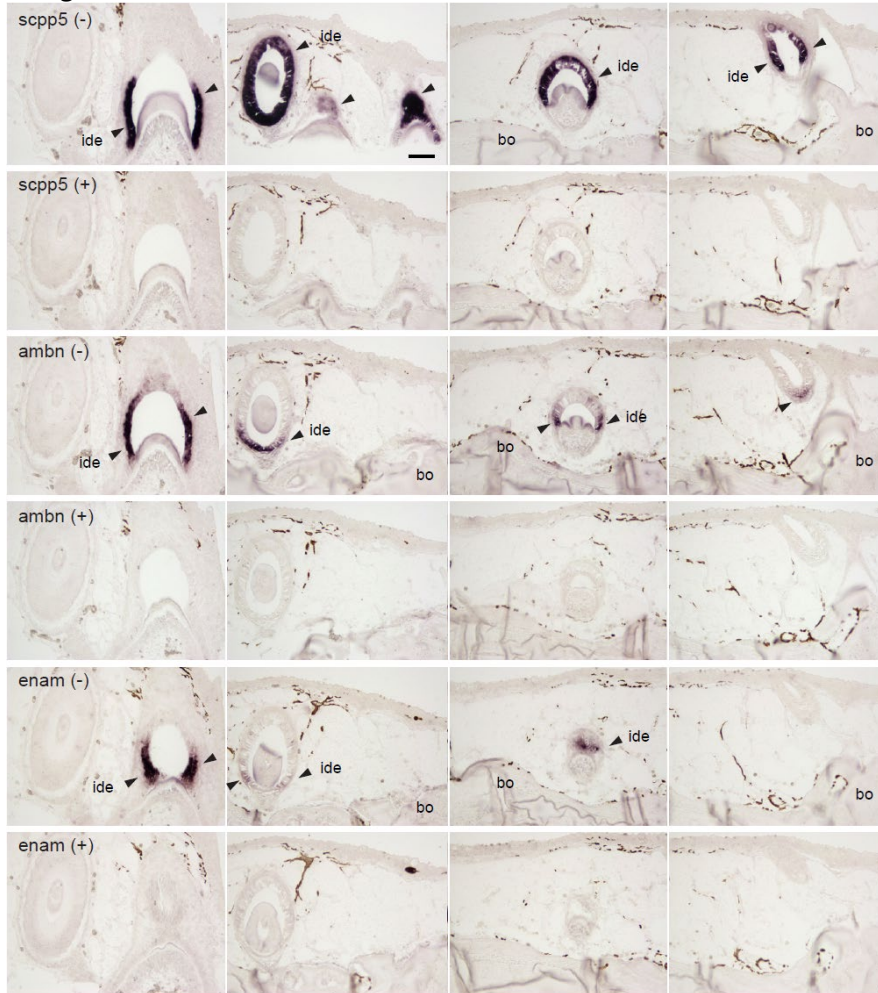

ISH: gar scales

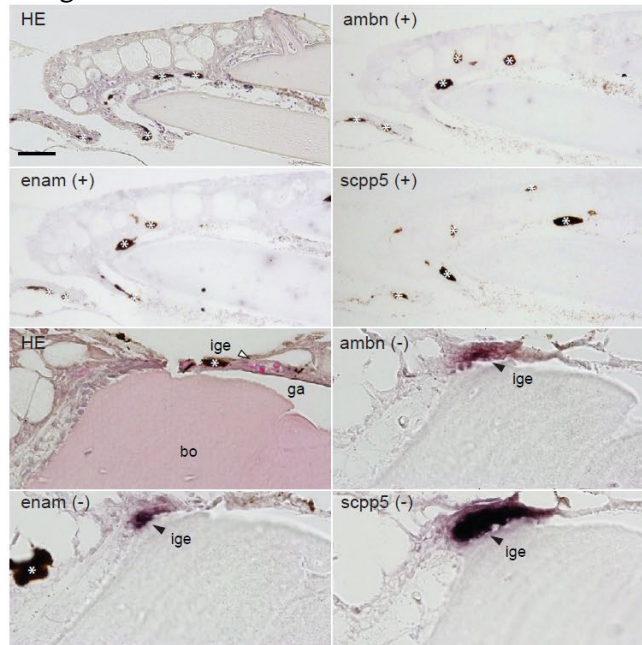

ISH: zebrafish teeth

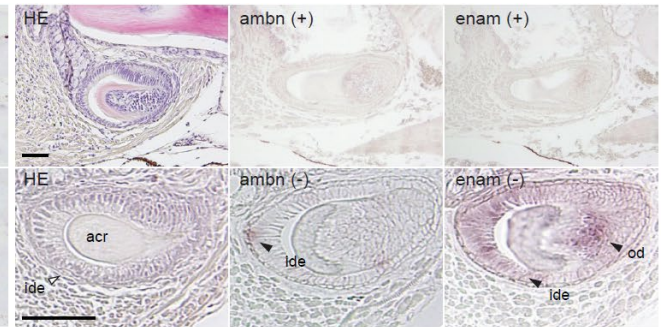



**B**

Optical IHC: gar acroдин, collar enamel, and ganoin

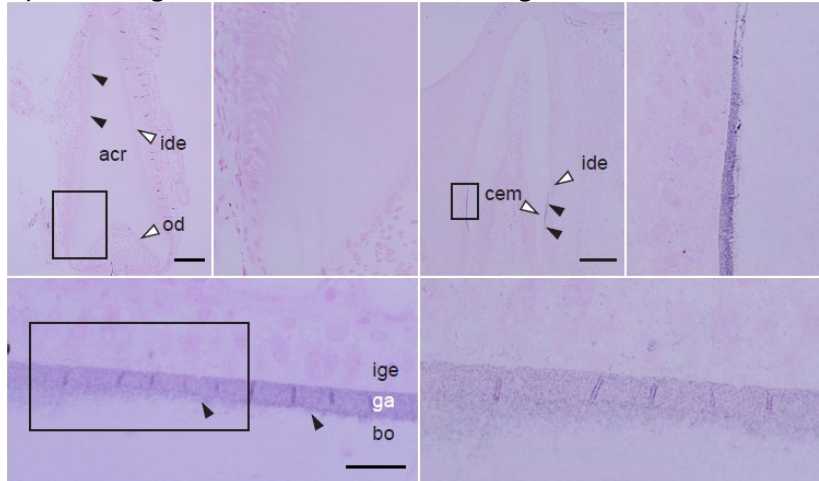

**C**

TEM IHC: gar acroдин, collar enamel, and ganoin

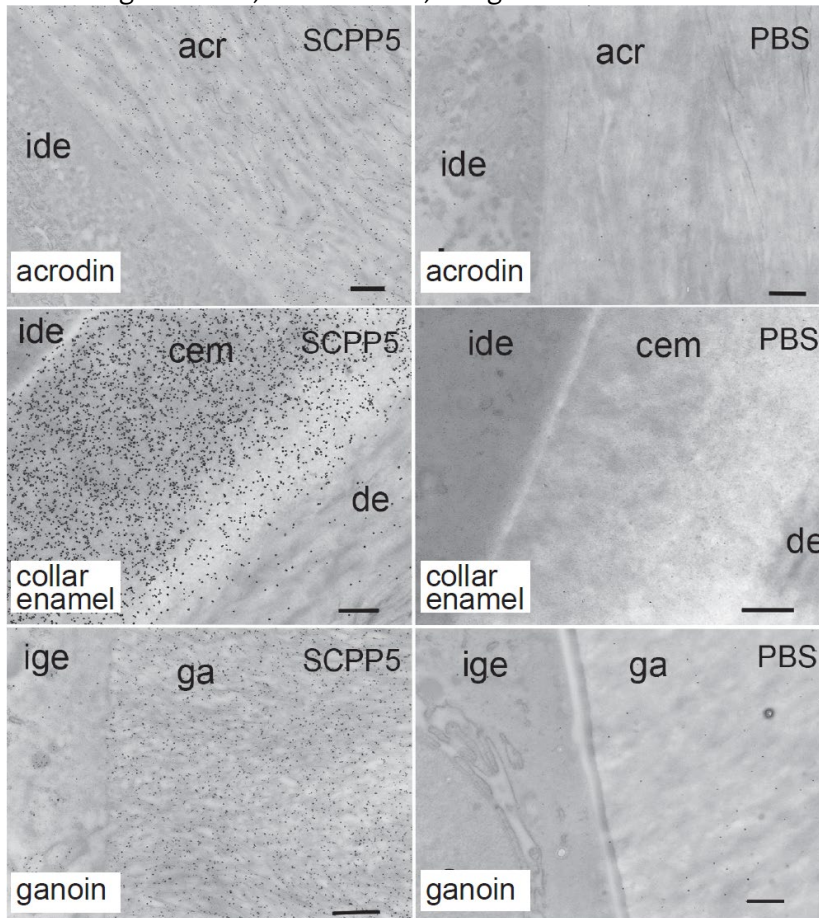

Figure S2. Expression of gar and zebrafish *scpp5*, *ambn*, and *enam* genes in teeth and/or scales, and distribution of gar *Scpp5* in teeth and scales, Related to Figures 2-4.

(A) ISH analysis of gar teeth, gar scales, and zebrafish teeth. Expression of *scpp5*, *ambn*, and *enam* genes were detected using antisense (-) probes, but not using sense (+) probes, which serve as negative controls. Images of HE staining are shown for gar scales and zebrafish teeth. All our ISH results are summarized in Figure 2P.

Abbreviations: acr, acrodin; bo, bone; ga, ganoin; ide, inner dental epithelial cells; ige, inner ganoin epithelial cells; od, odontoblasts. Scale bar, 50  $\mu\text{m}$ .

(B) Original images for optical IHC analysis (Figures 3A-3F) without enhancing image contrast. See the legend of Figure 3. Scale bar, 100 $\mu\text{m}$  (upper row) or 20  $\mu\text{m}$  (lower row).

(C) TEM IHC analysis of gar *Scpp5* in acrodin, collar enamel, and ganoin. PBS was used as negative controls.

Abbreviations: acr, acrodin, cem, collar enamel; de, dentine; ga, ganoin; ide, inner dental epithelial cells; ige, inner ganoin epithelial cells. Scale bar, 500 nm.

**A**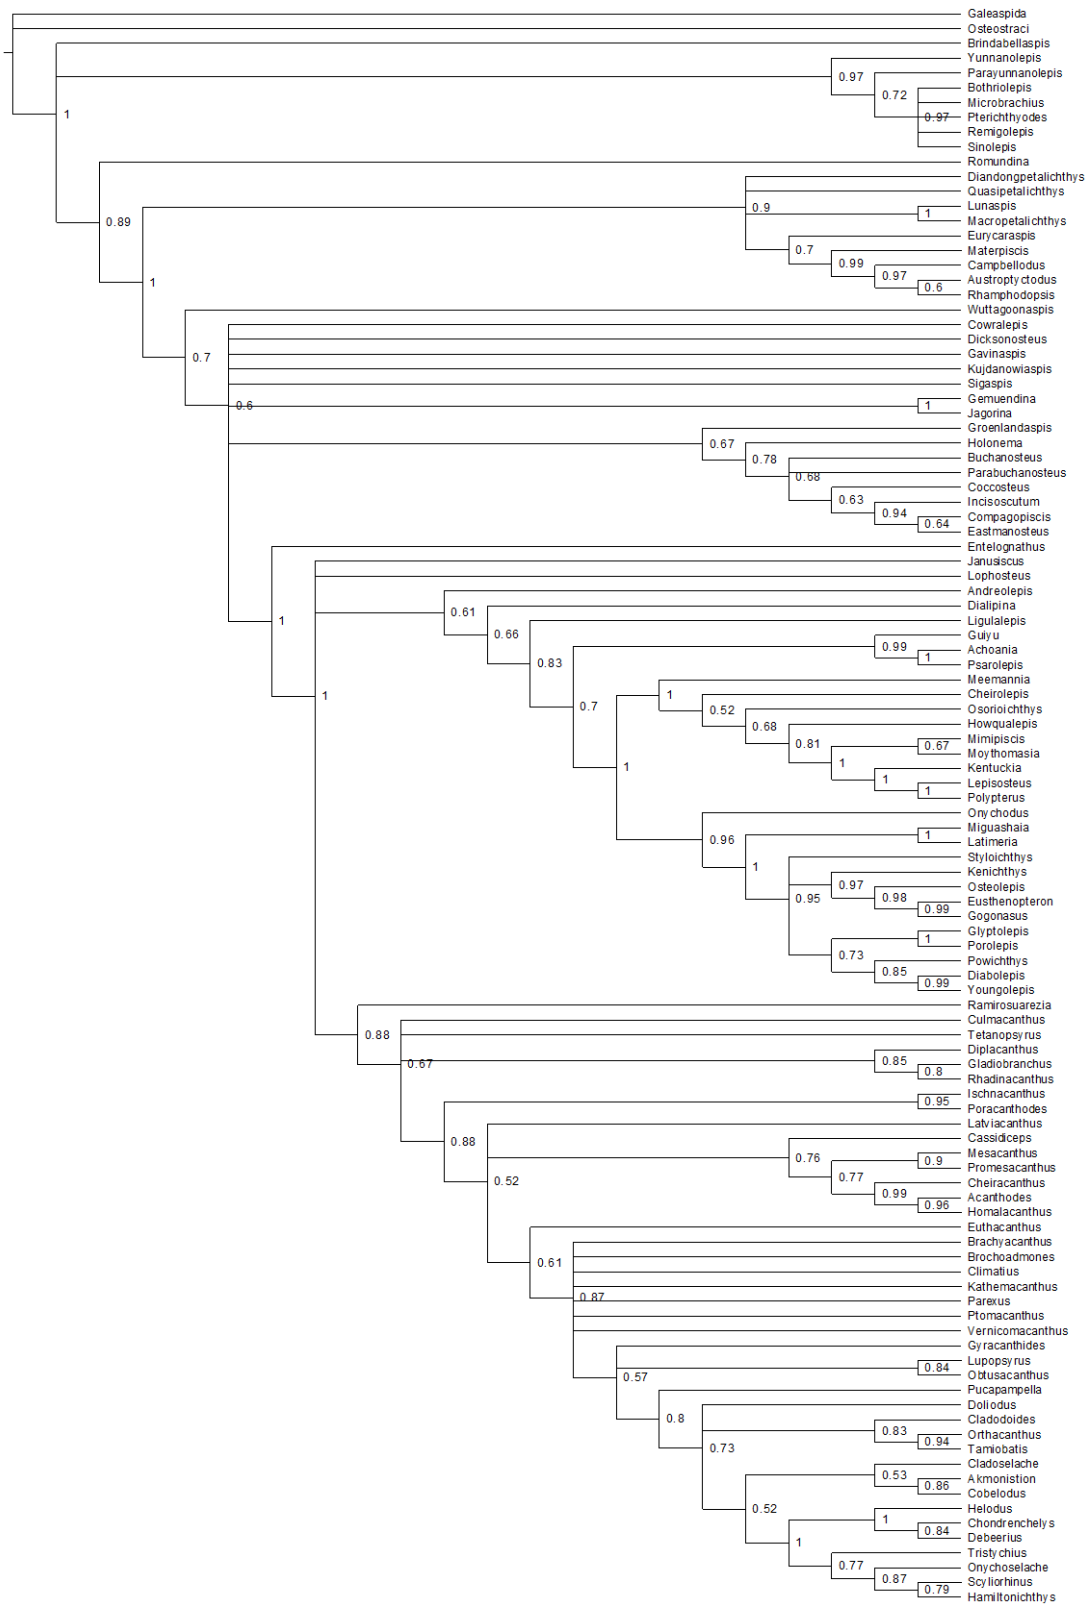



B

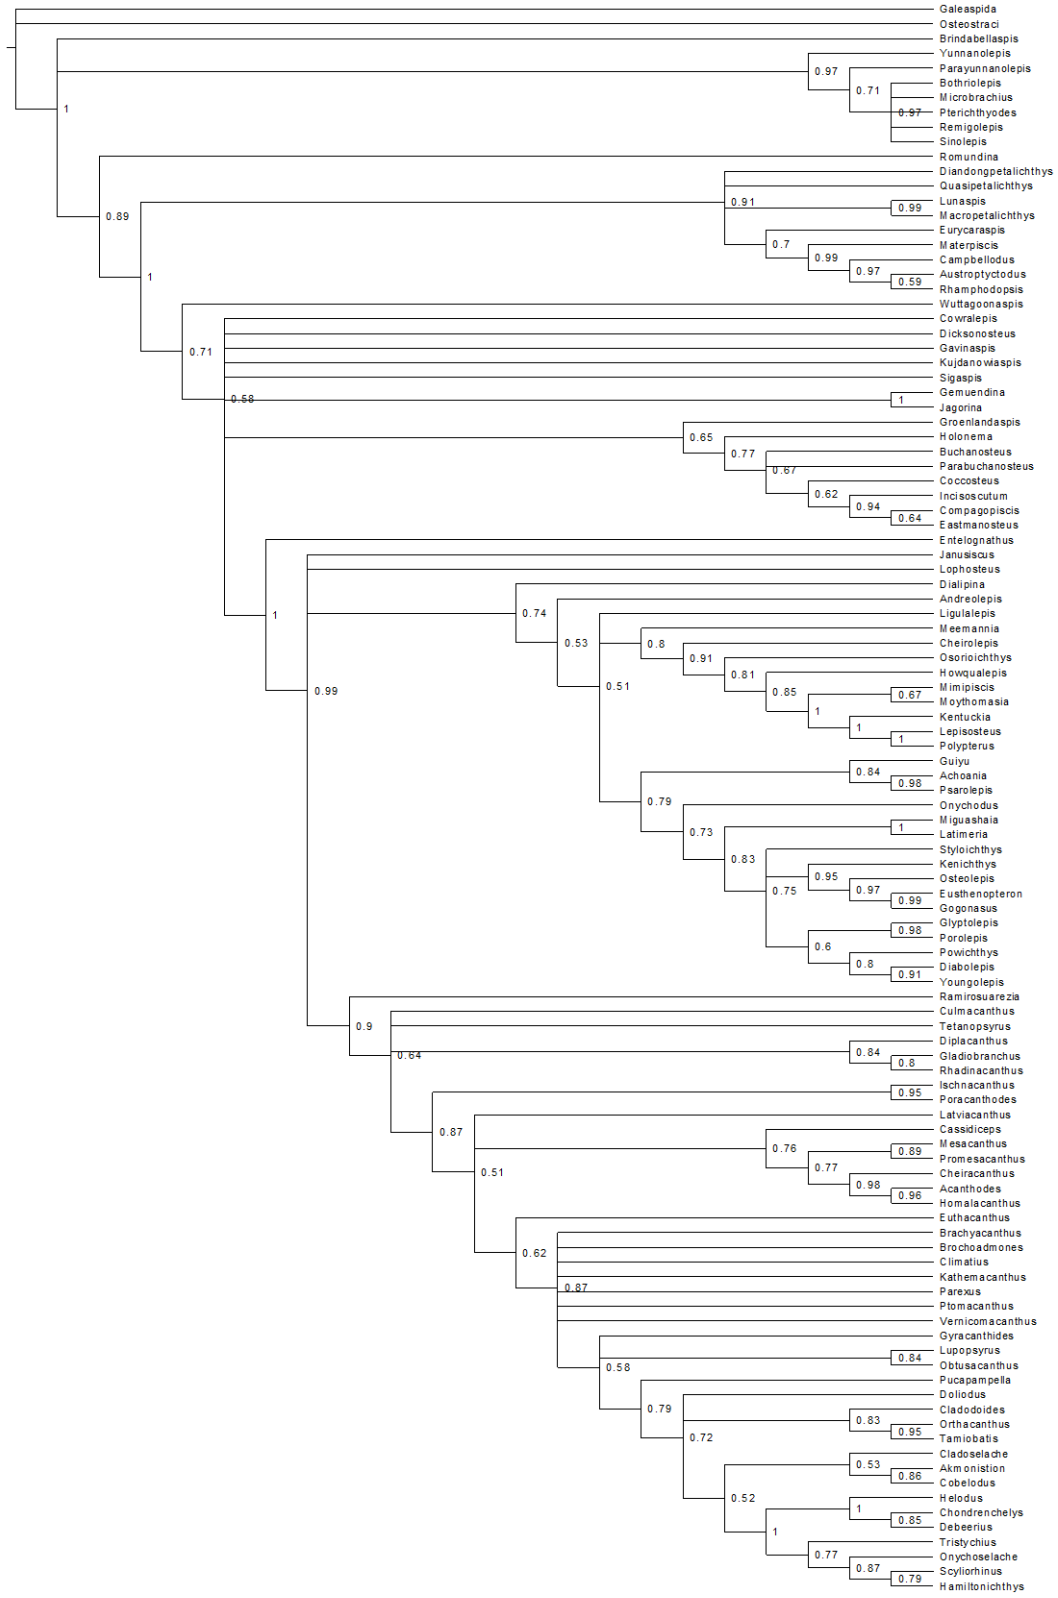

C

Dental Acrodin (constrained tree)

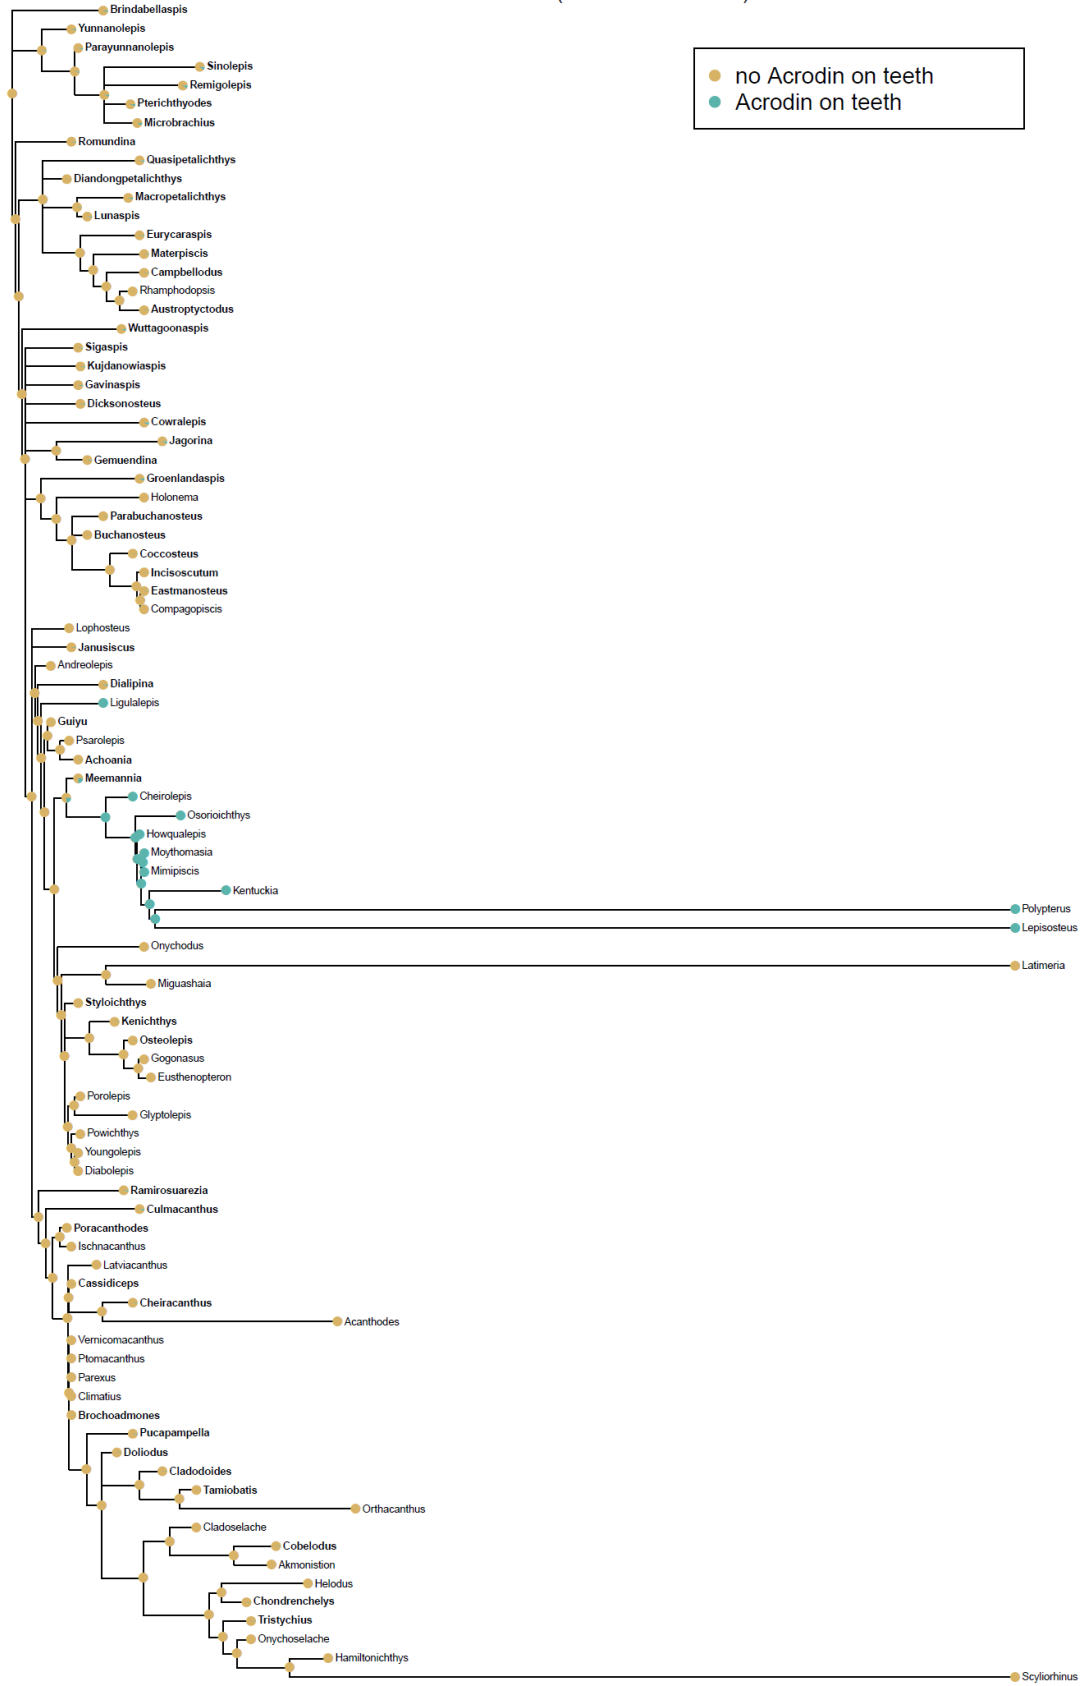

D

Dental Acrodin (unconstrained tree)

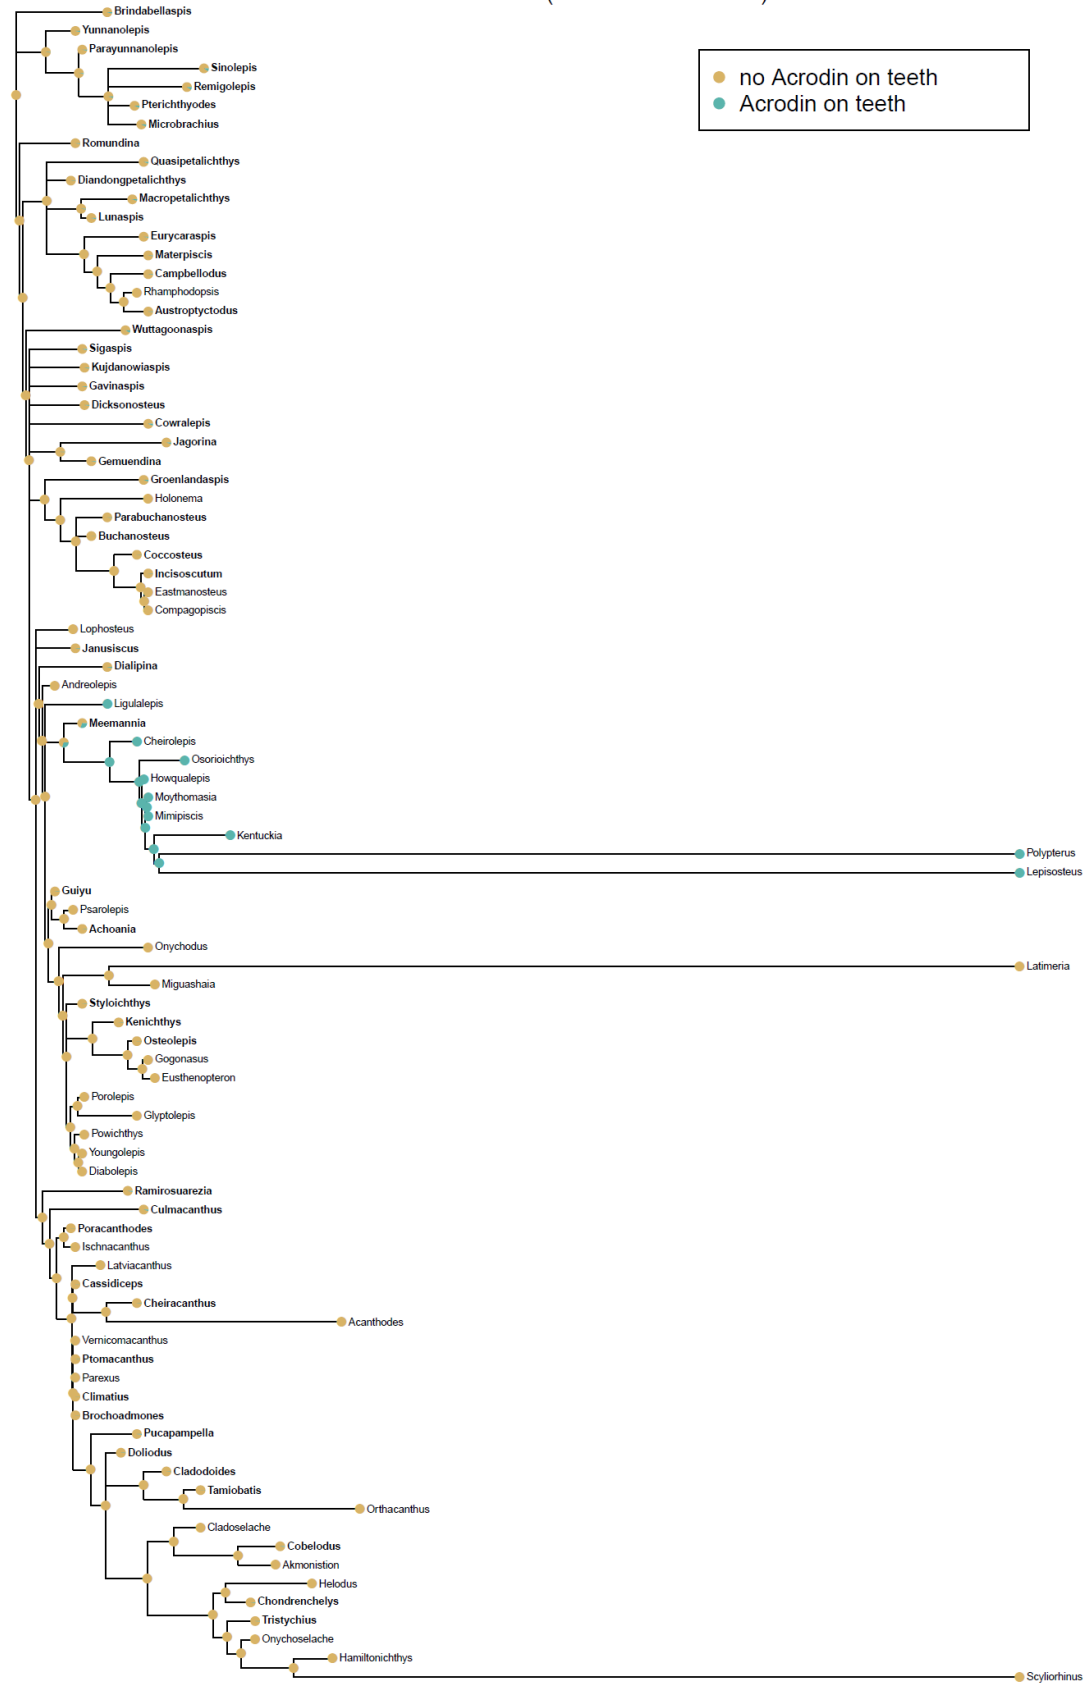

E

Dental Enameloid (constrained tree)

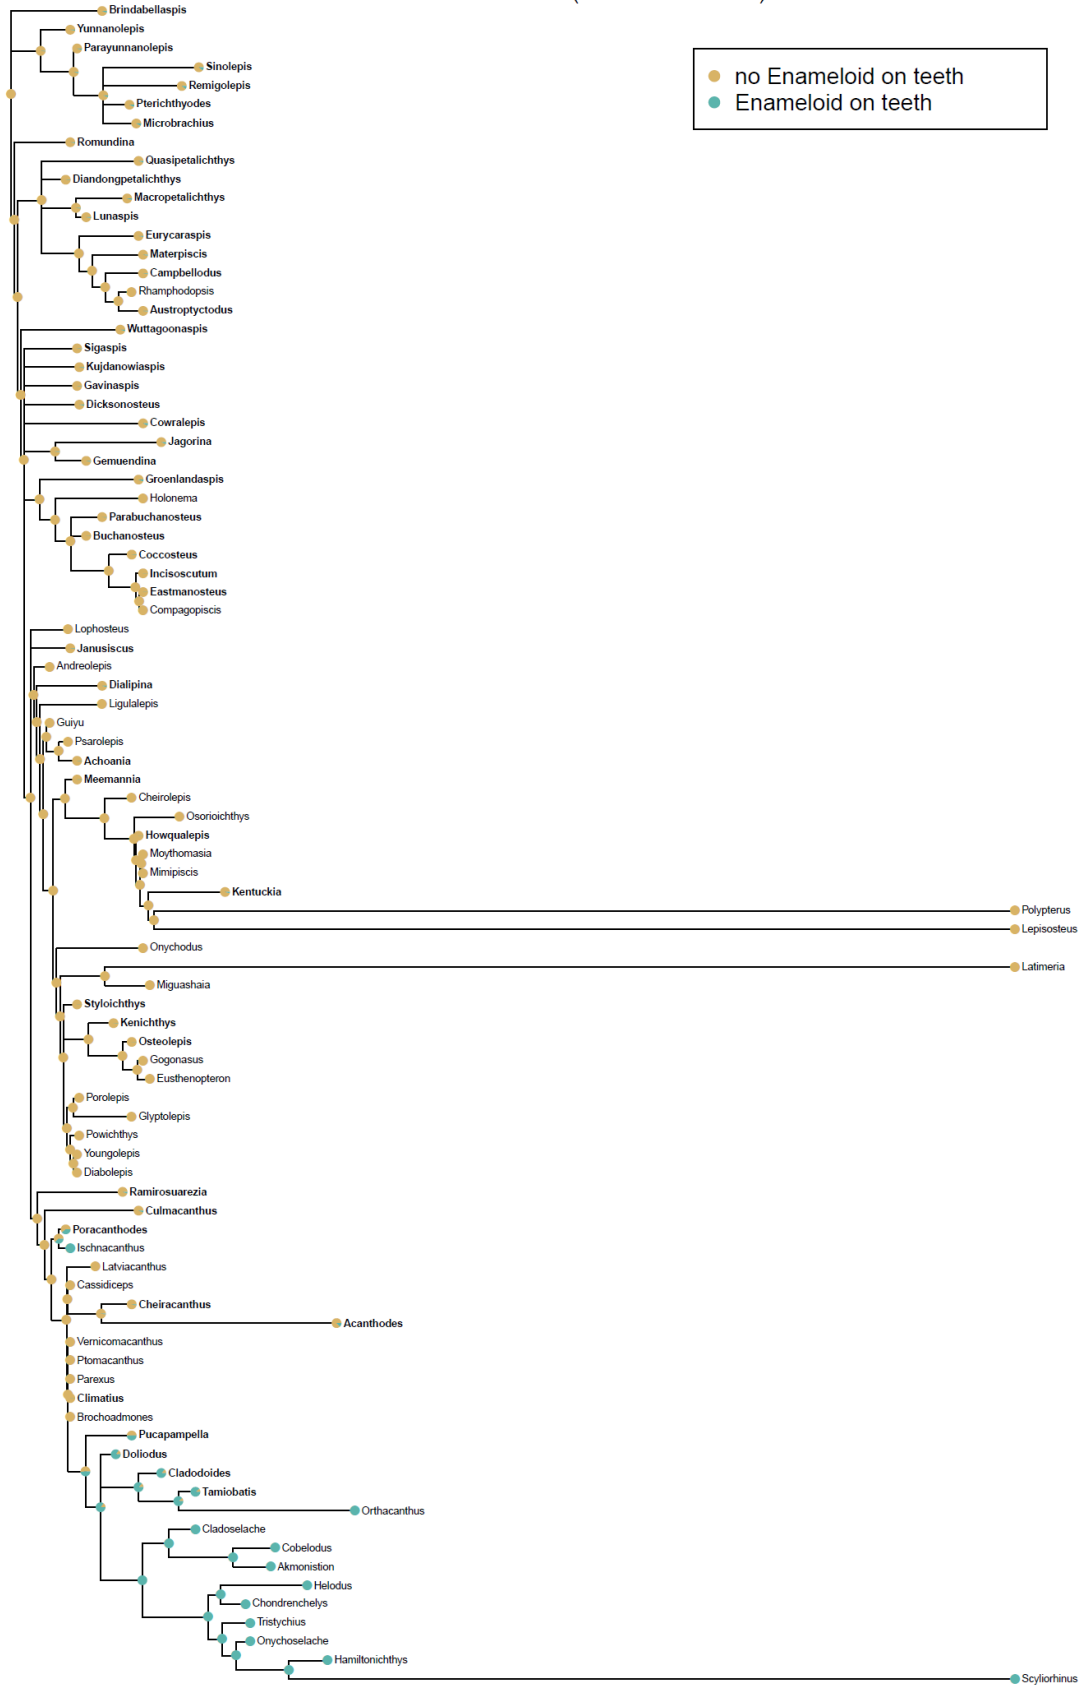

**F**

## Dental Enameloid (unconstrained tree)

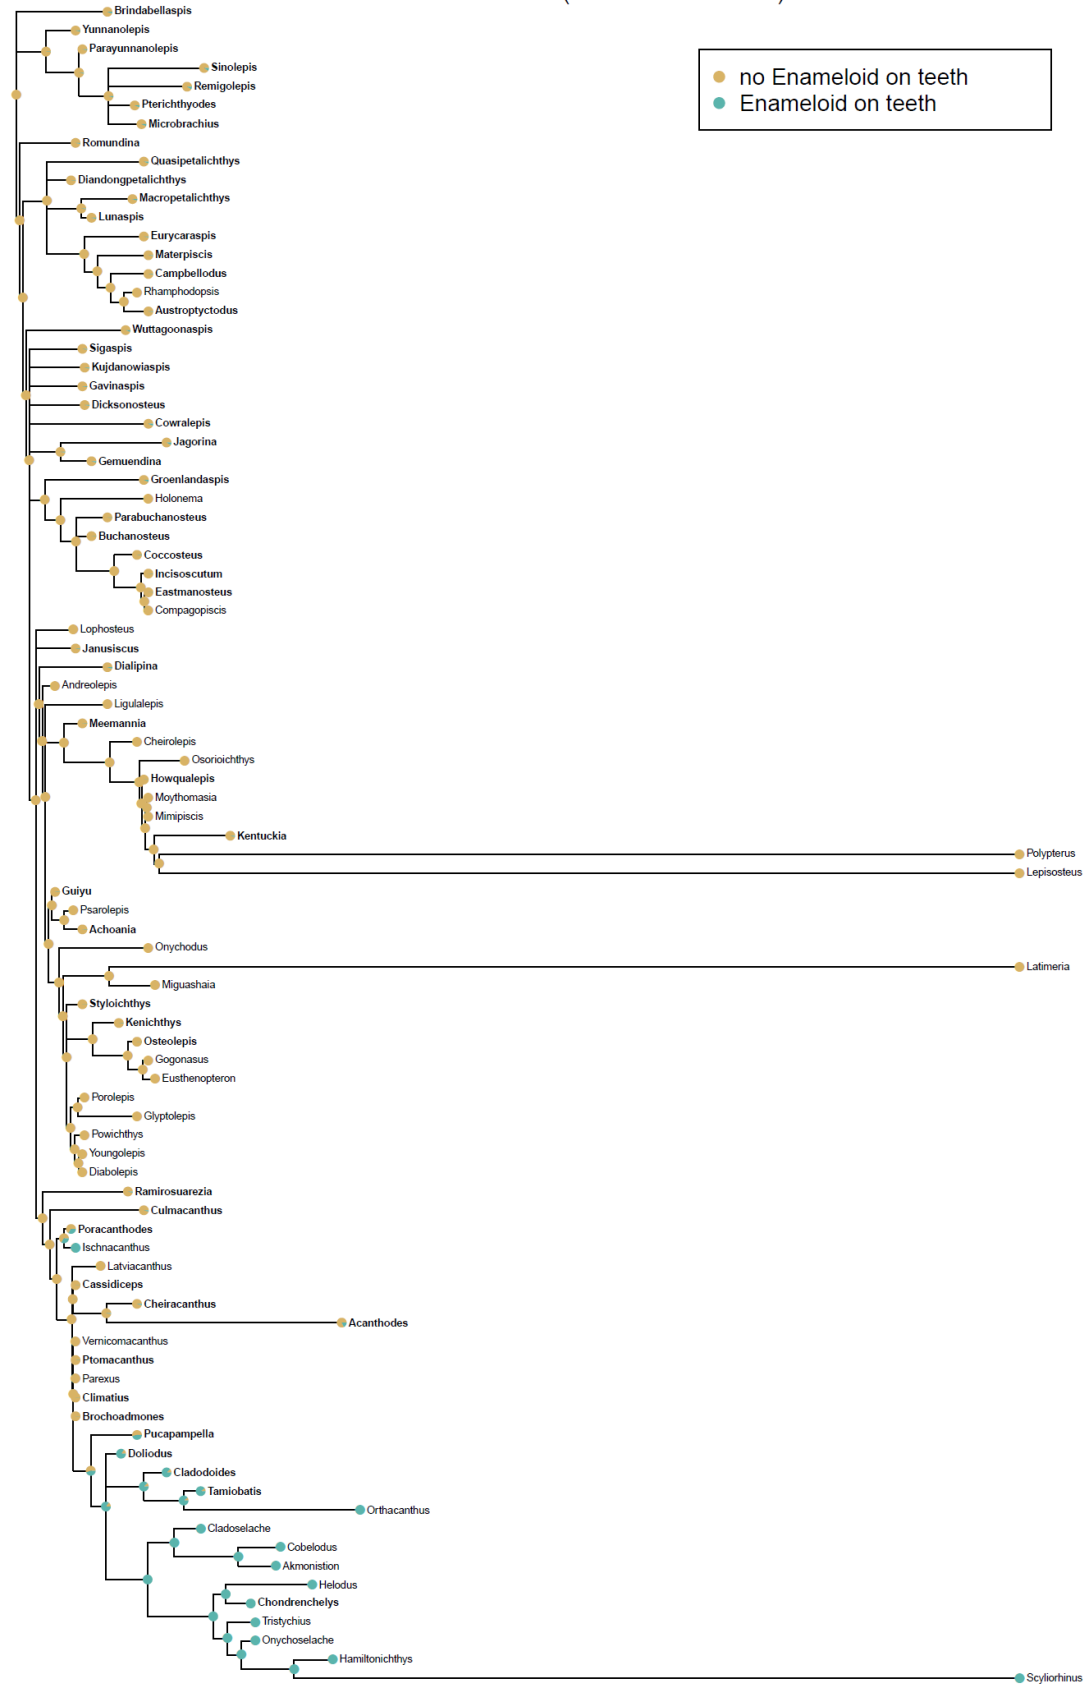

**G**

## Dermal Enameloid (constrained tree)

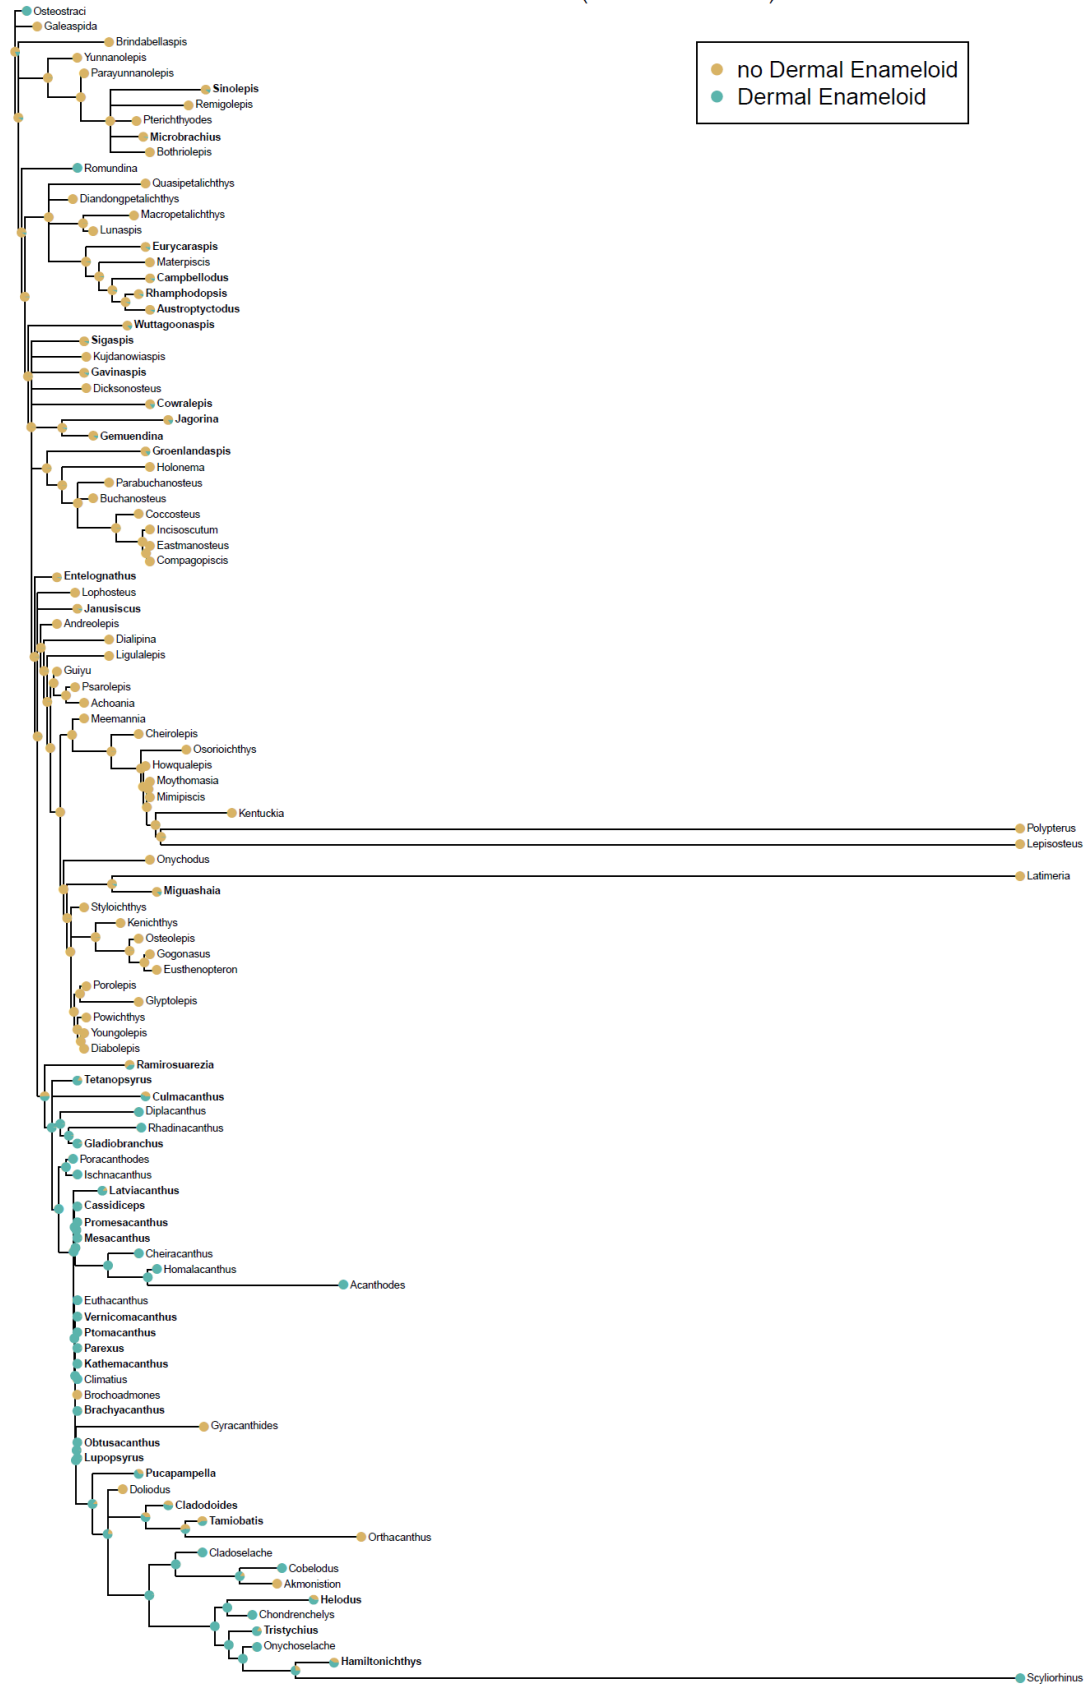

H

Dermal Enameloid (unconstrained tree)

● no Dermal Enameloid  
● Dermal Enameloid

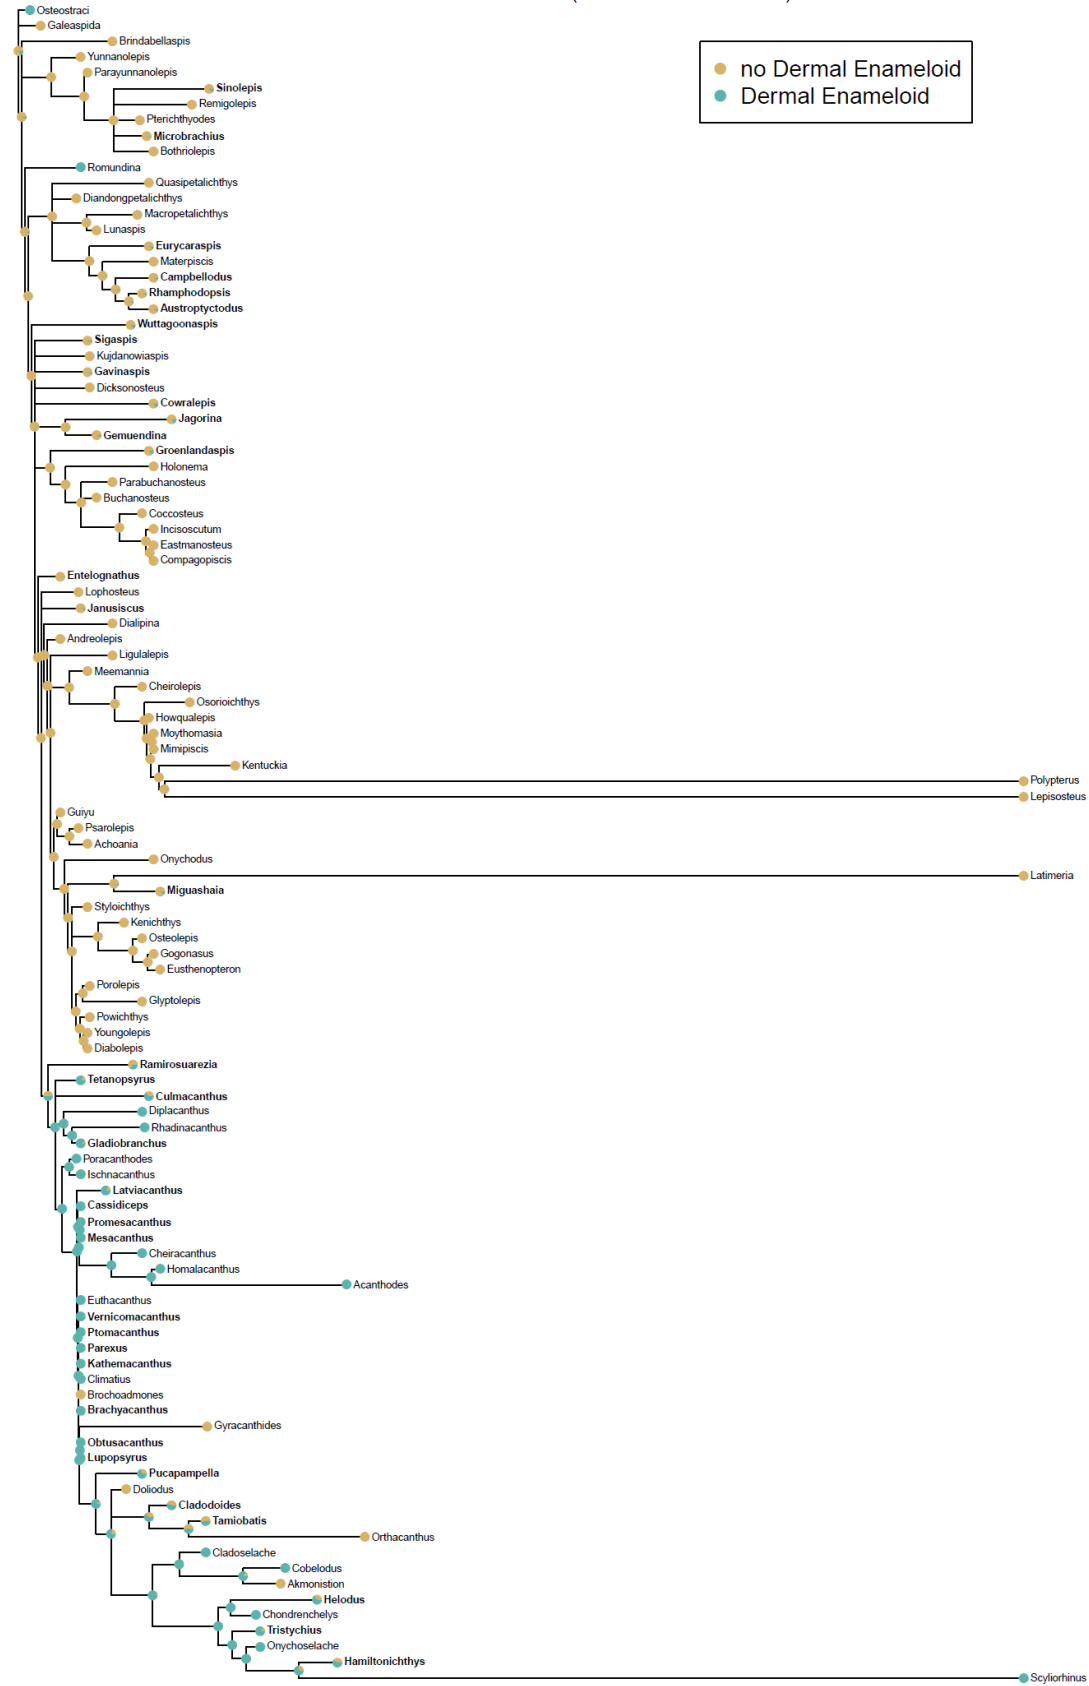

# Dental Enamel (constrained tree)

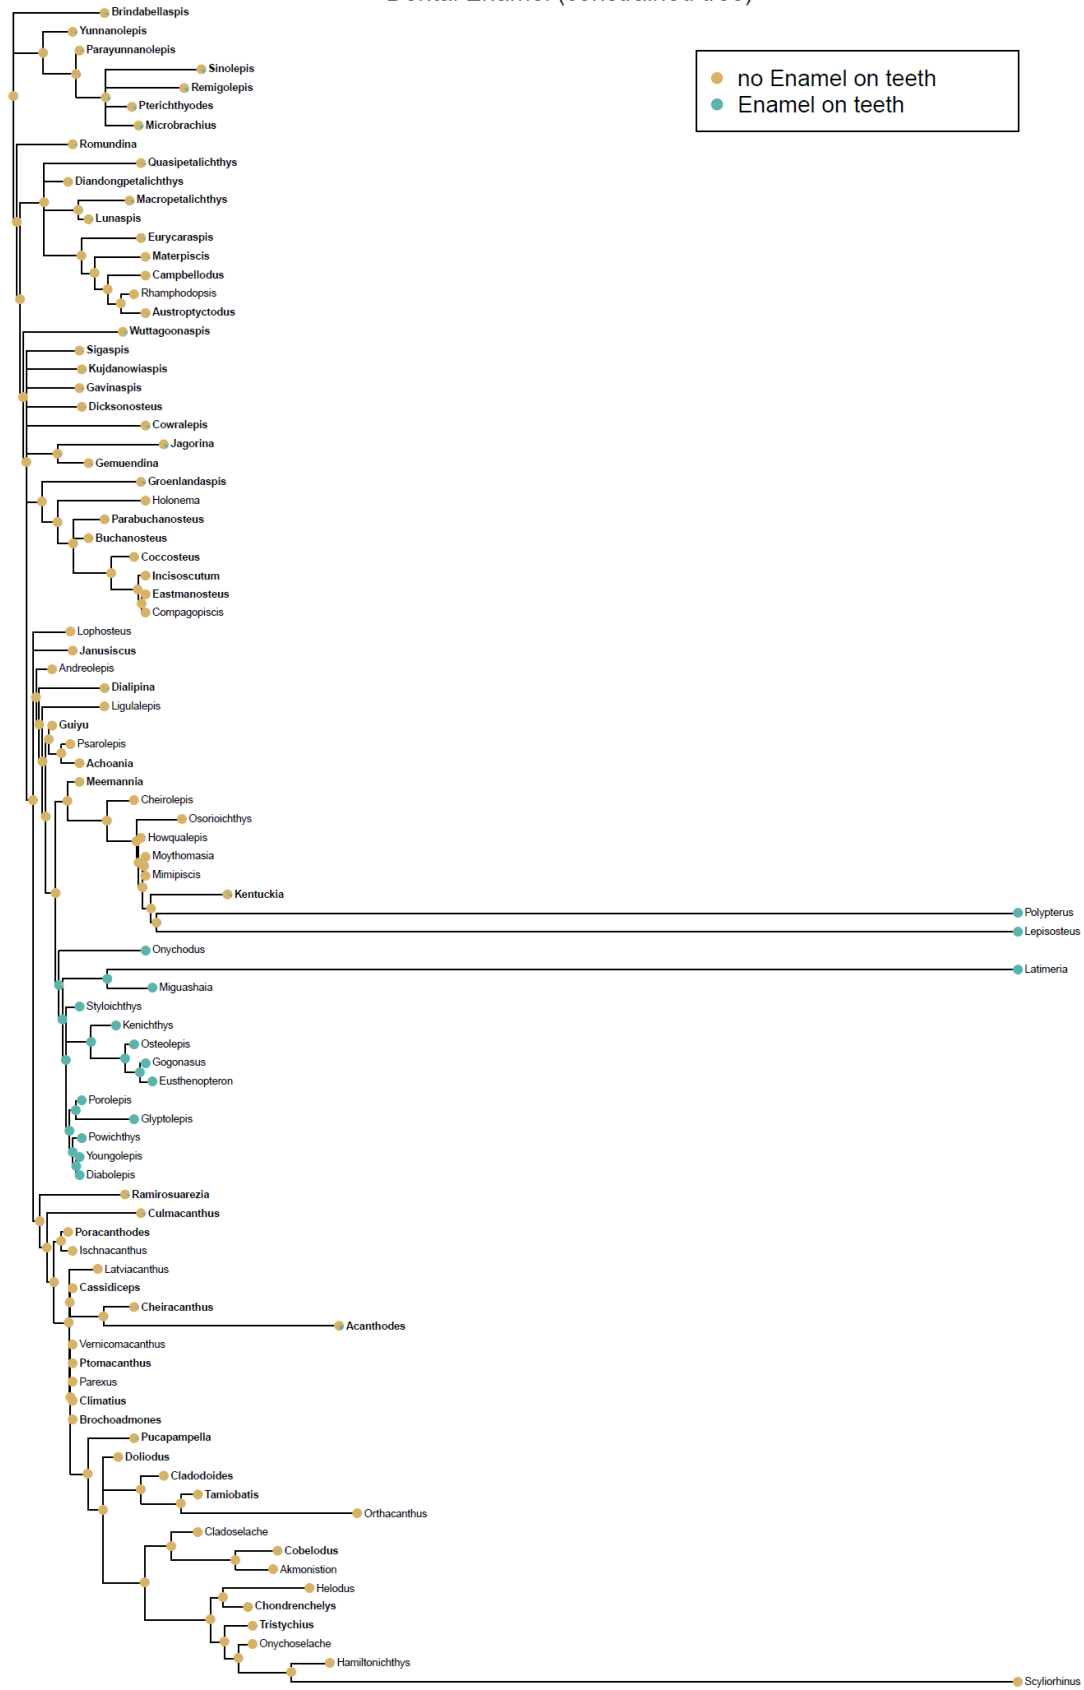



J

Dental Enamel (unconstrained tree)

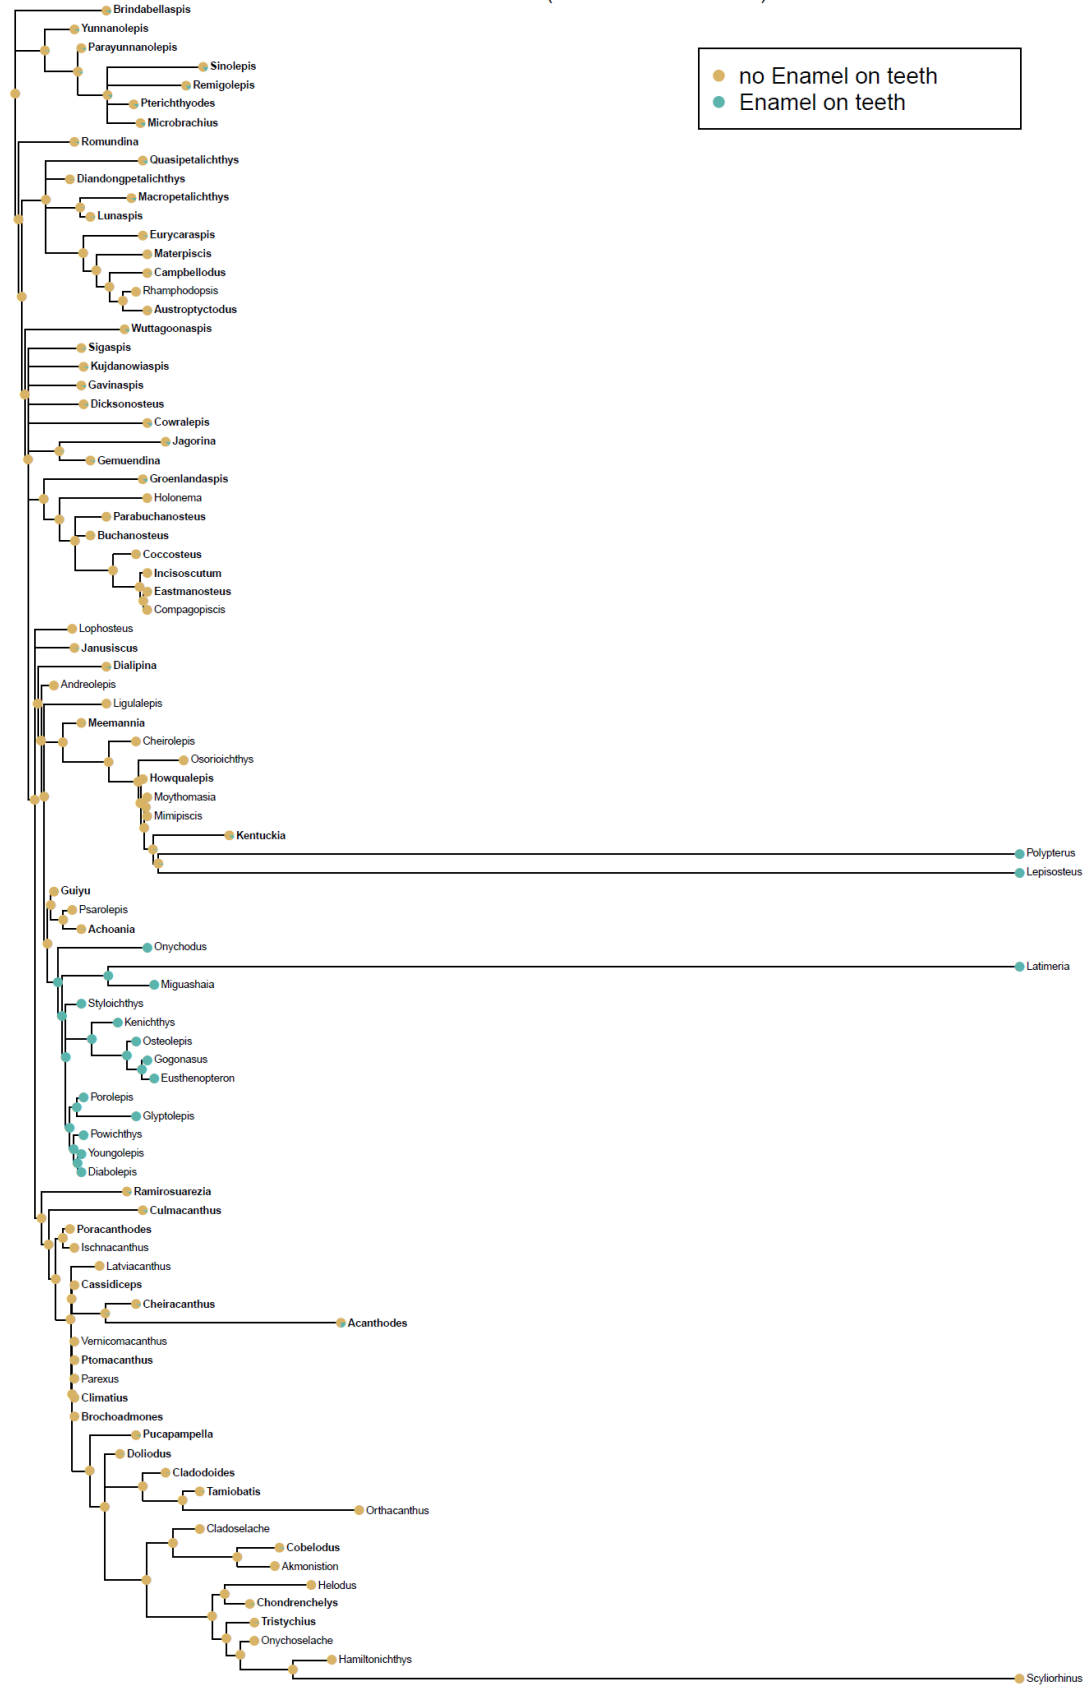

K

Dermal Enamel (constrained tree)

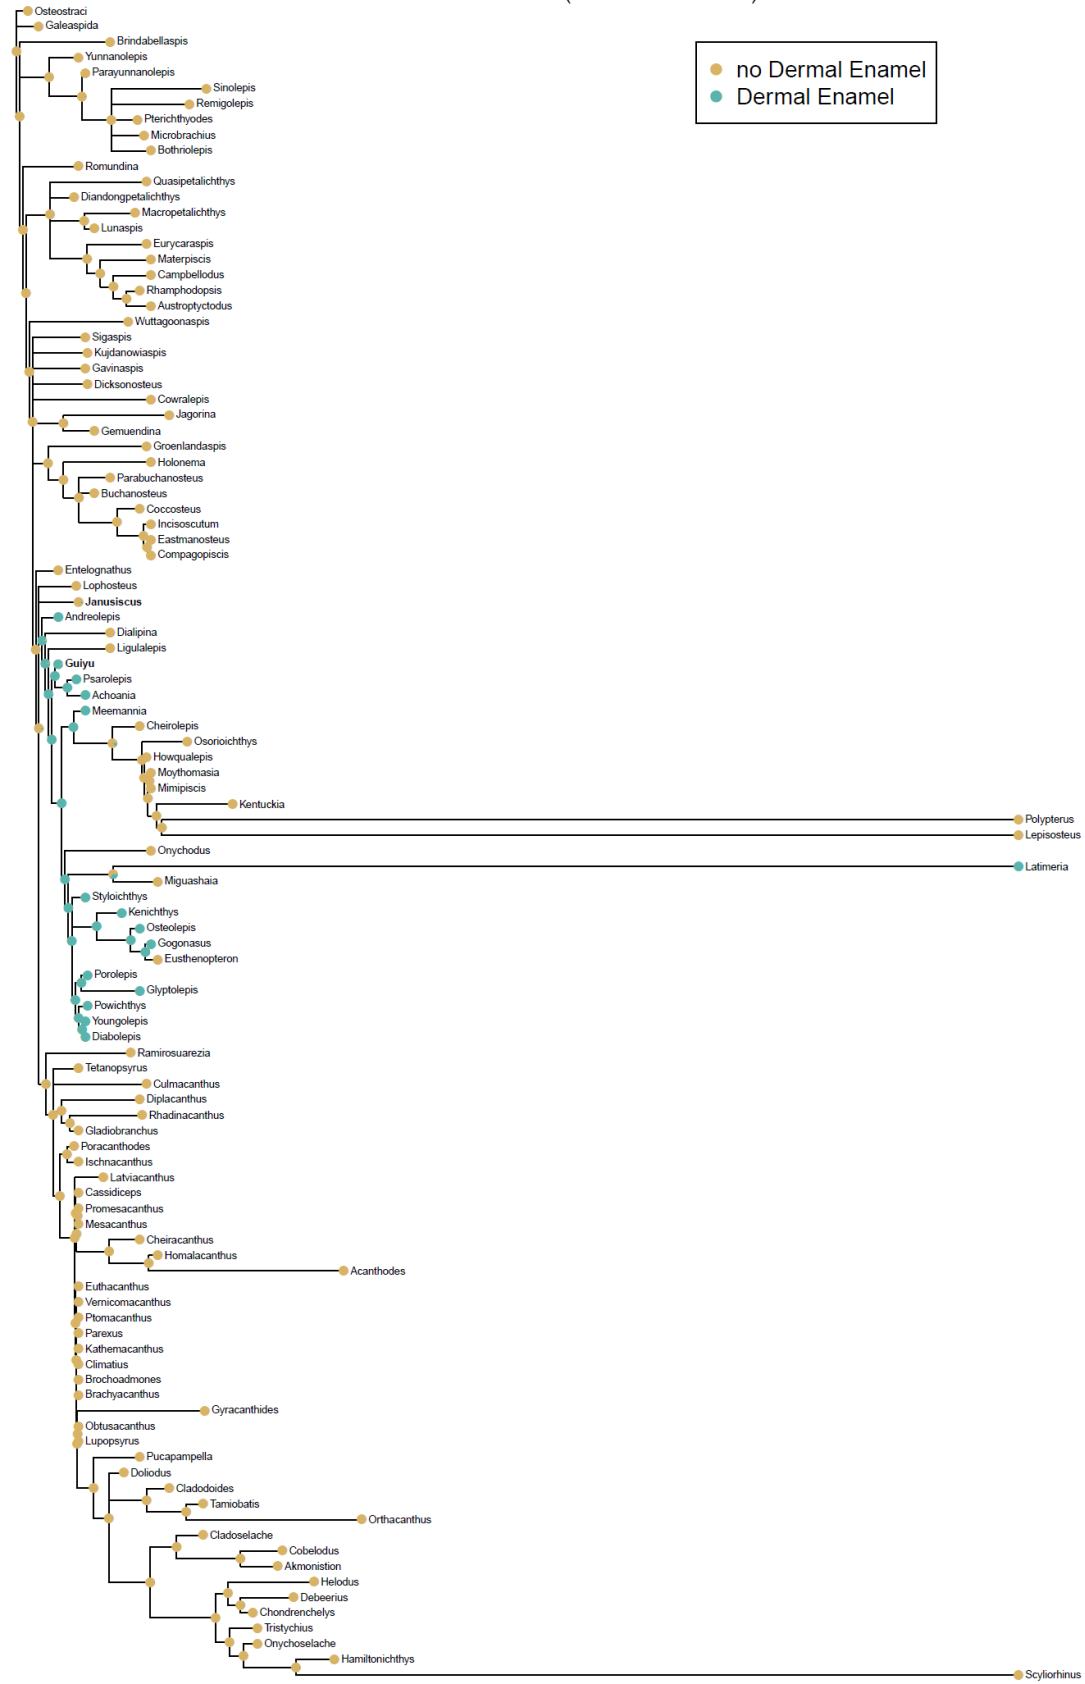

L

### Dermal Enamel (unconstrained tree)

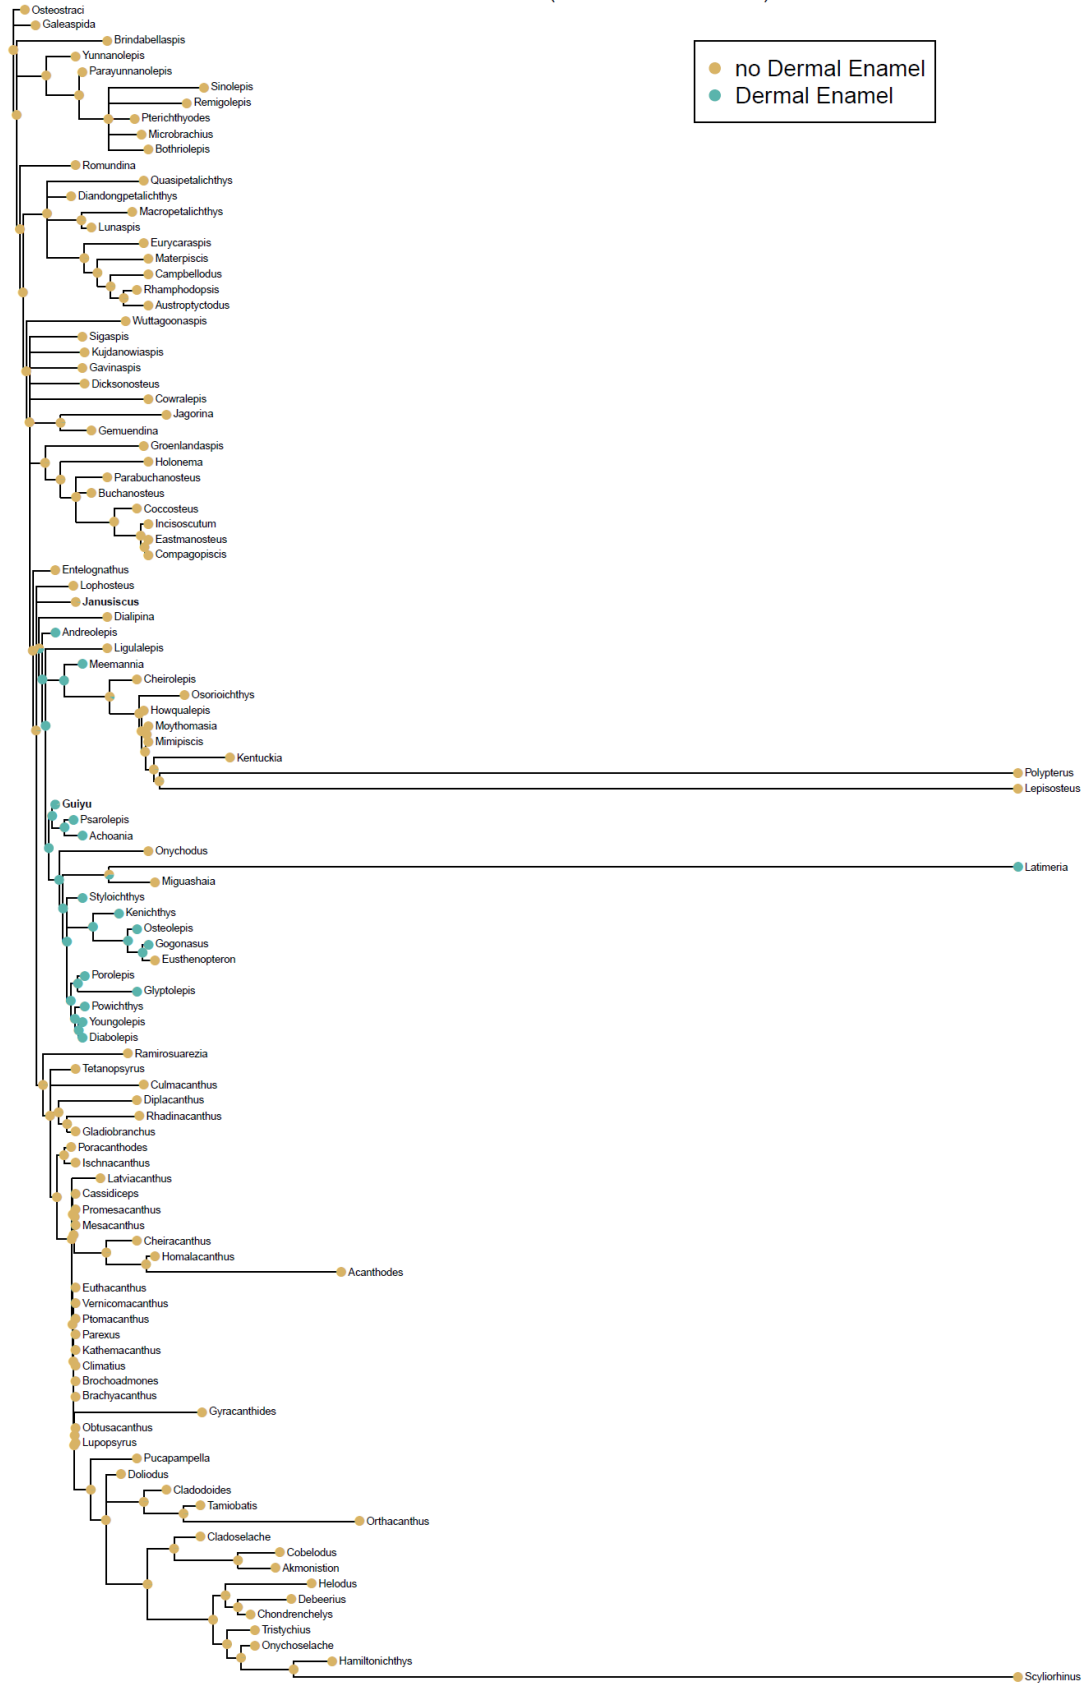

M

Dermal Ganoin (constrained tree)

● no Dermal Ganoin  
● Dermal Ganoin

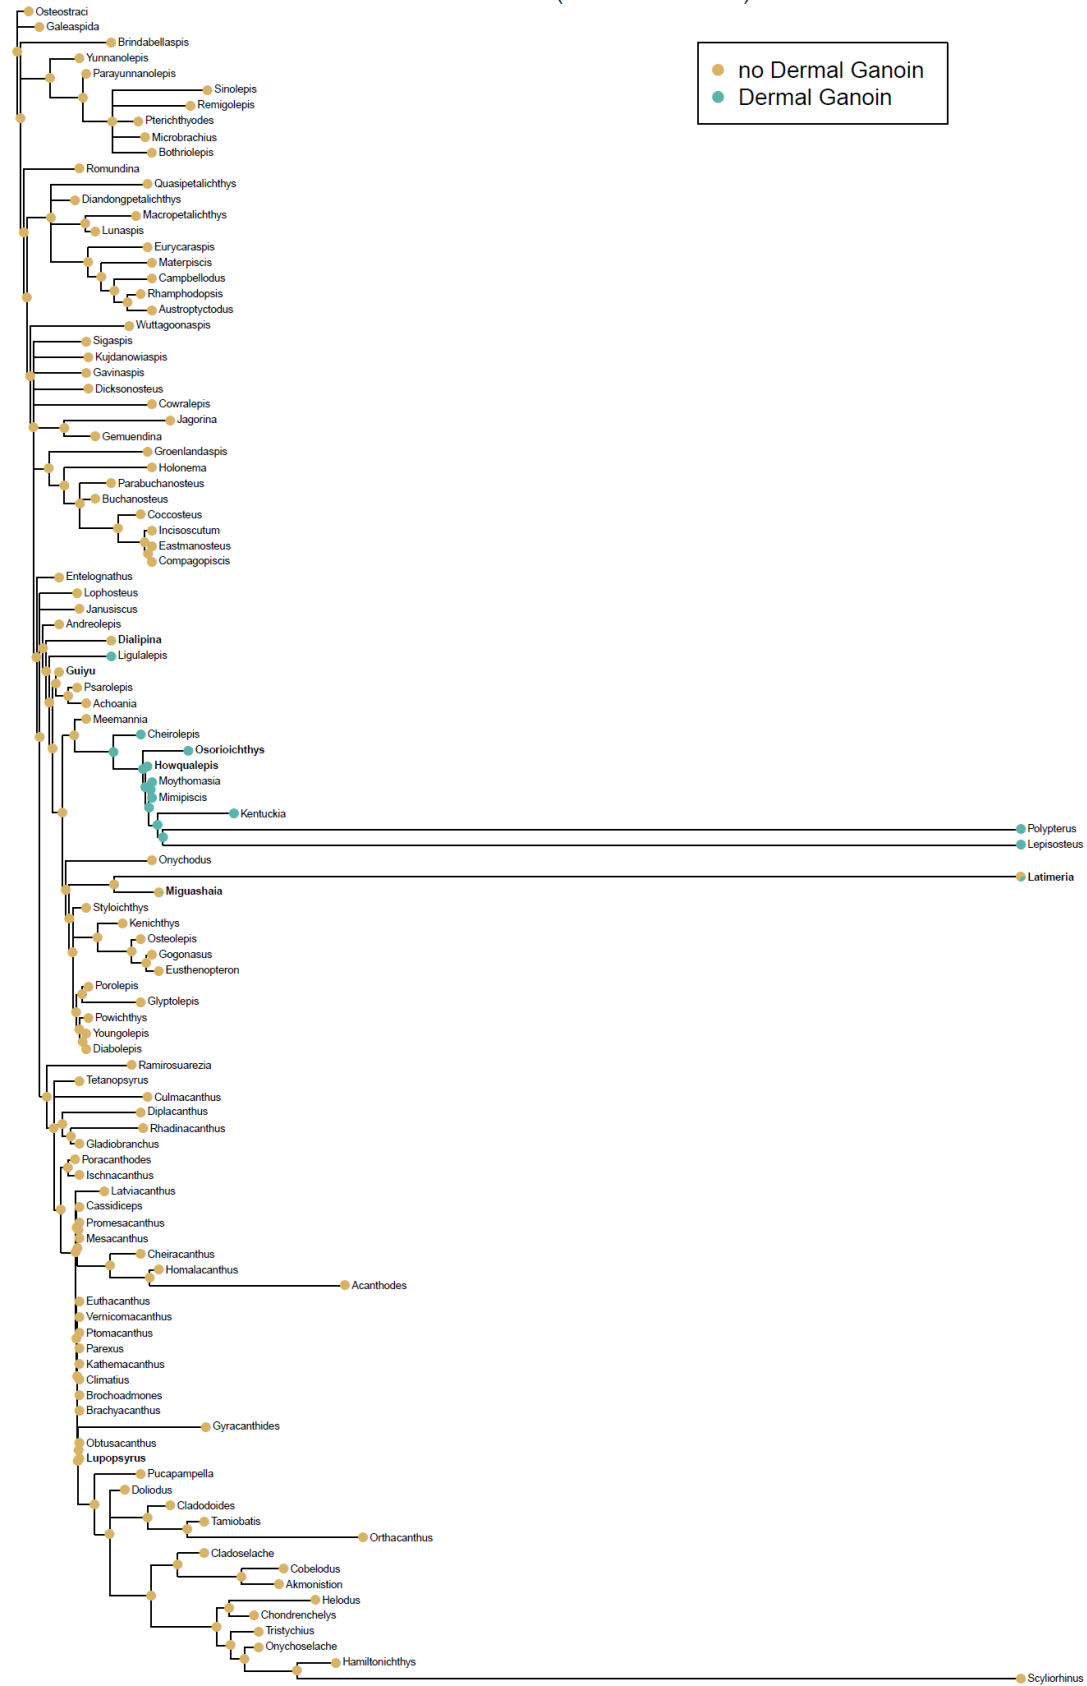

N

Dermal Ganoin (unconstrained tree)

● no Dermal Ganoin  
● Dermal Ganoin

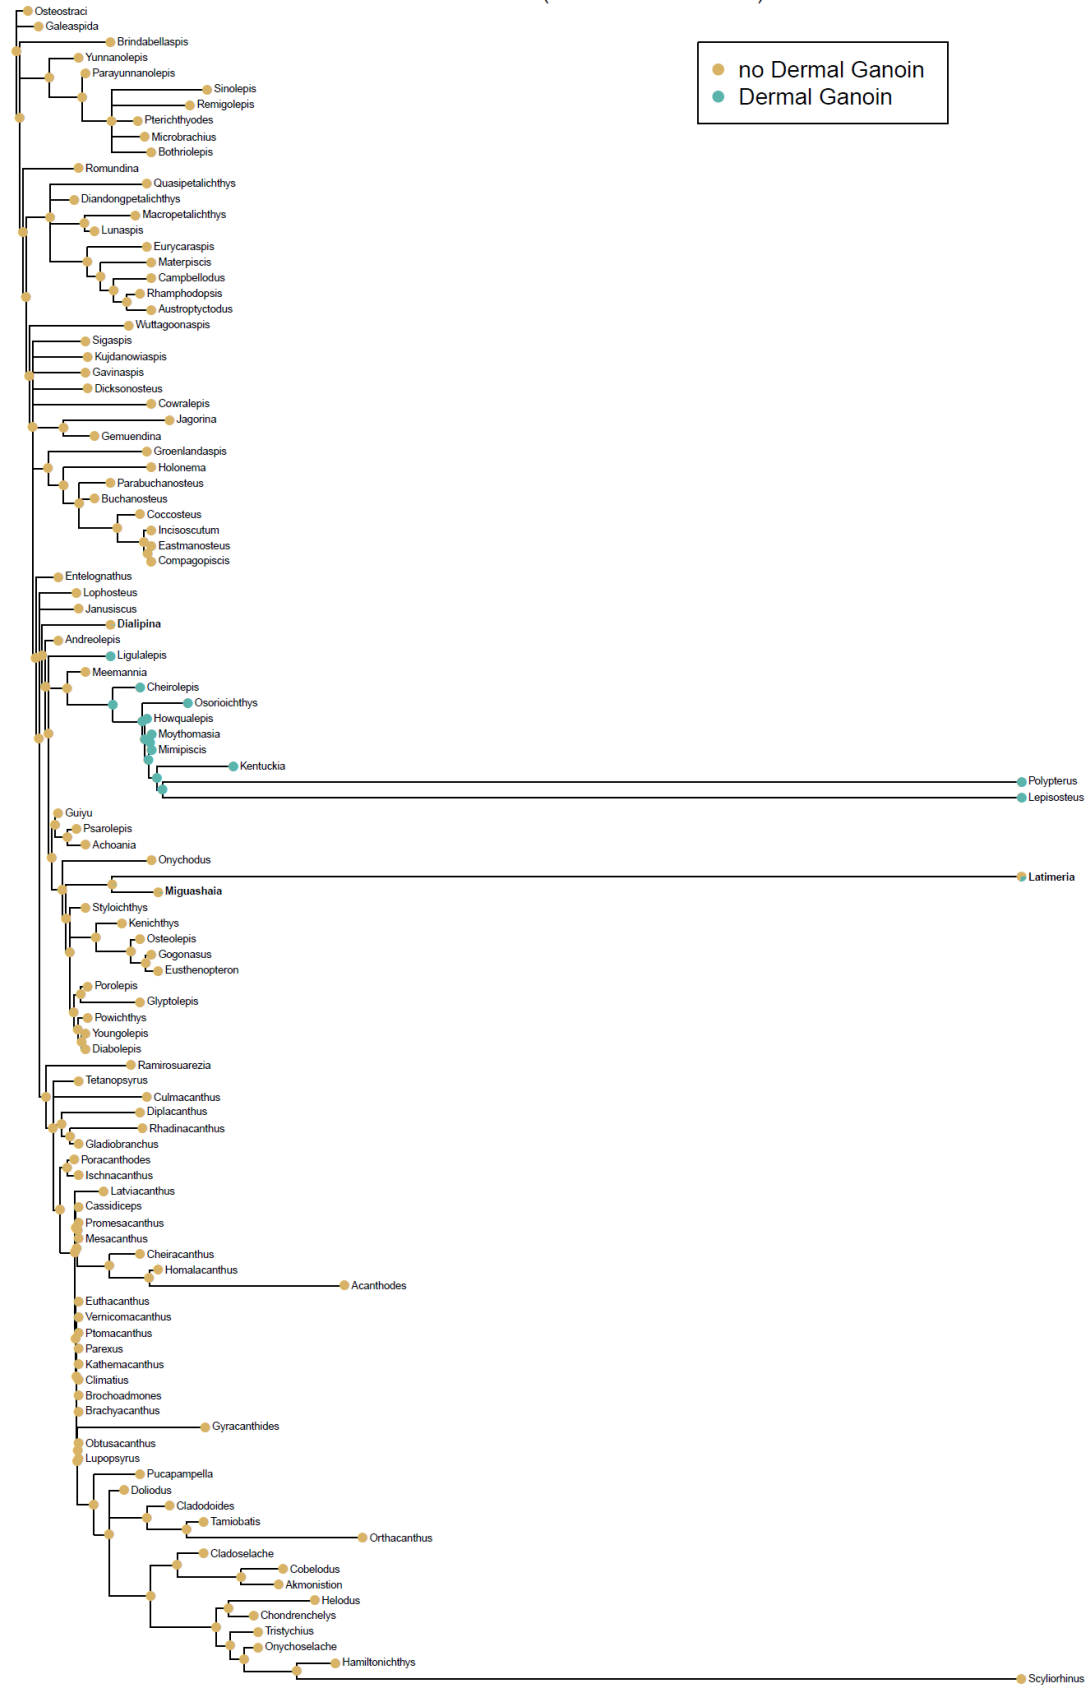

O

### Dermal Enamel/Ganoin (constrained tree)

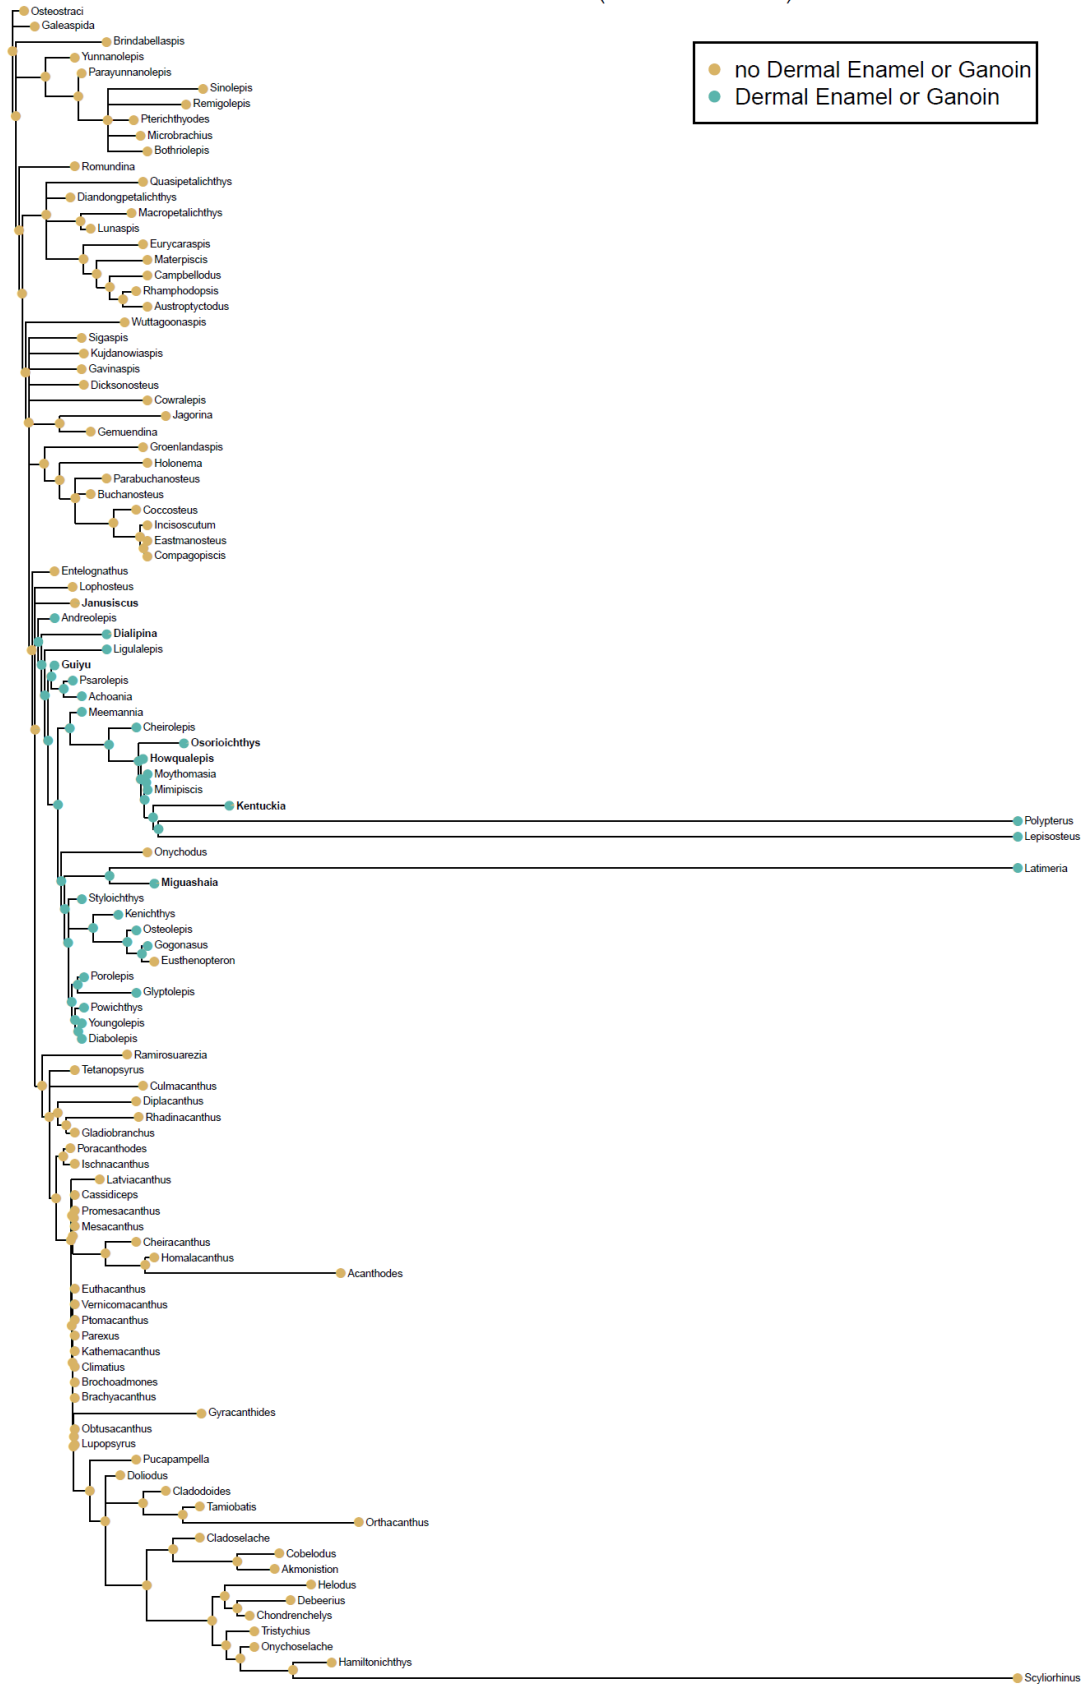

P

Dermal Enamel/Ganoin (unconstrained tree)

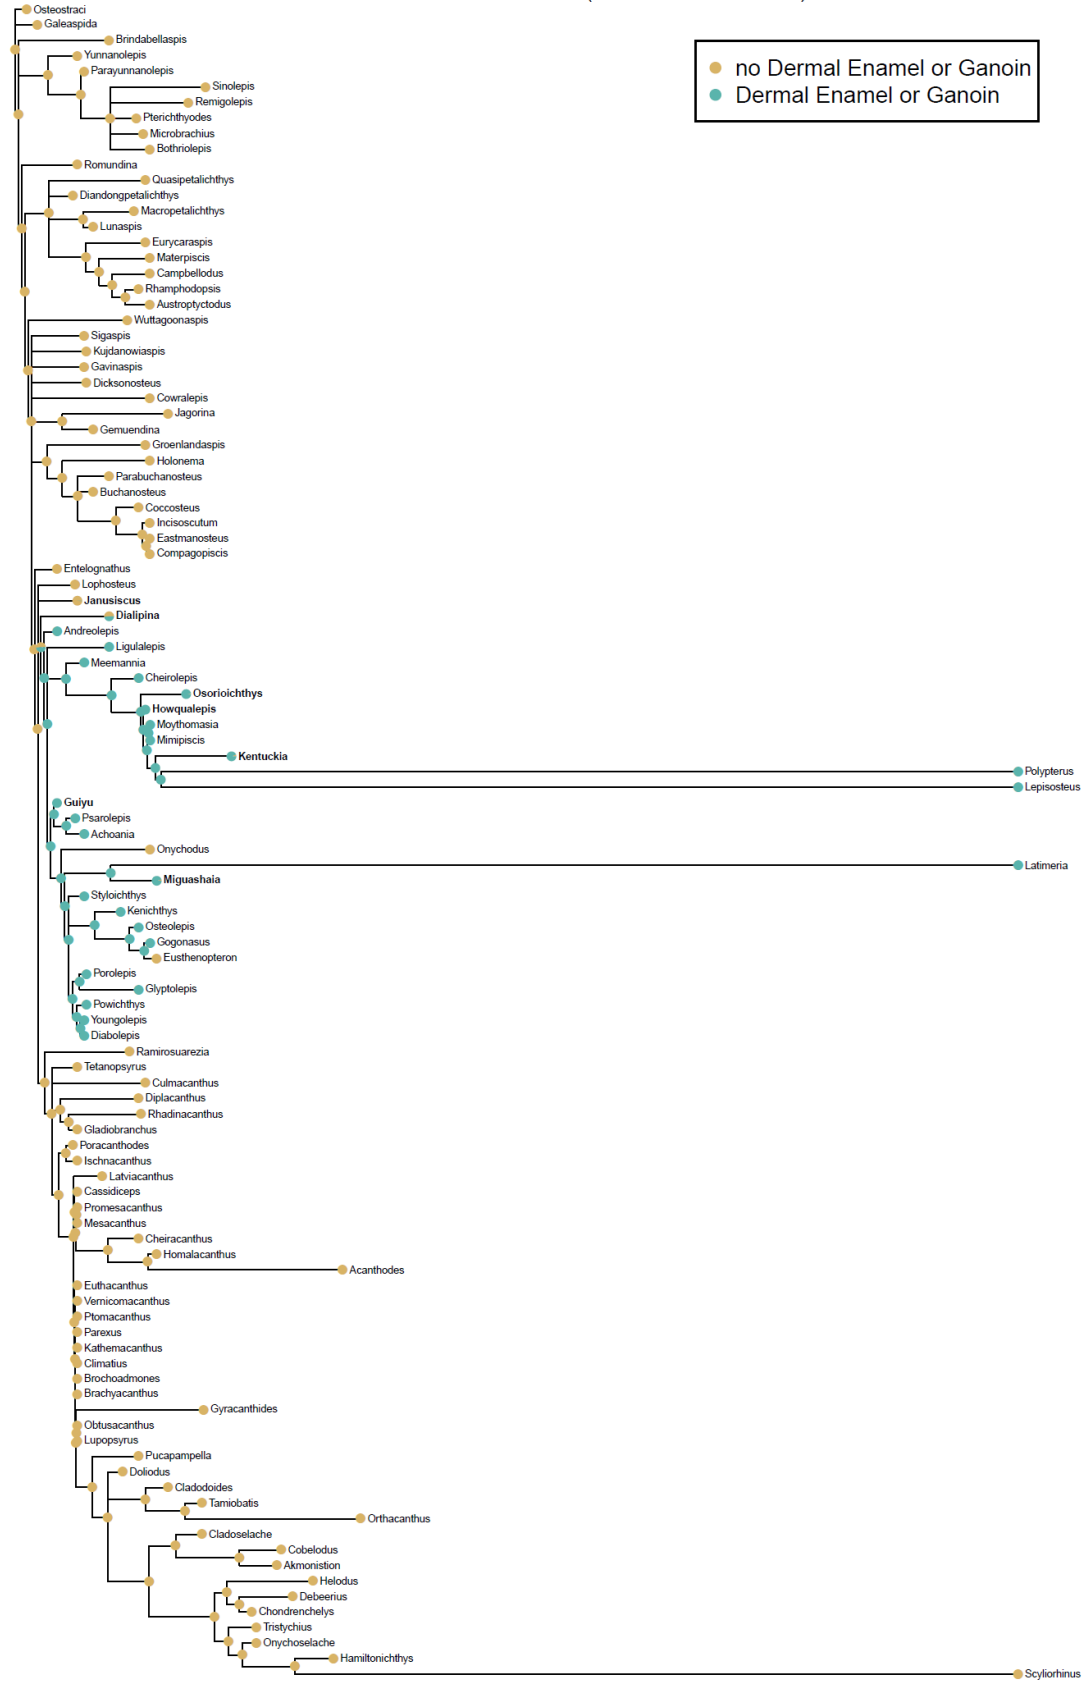

Q

Dermal hypermineralized tissue (constrained tree)

● no Dermal hypermineralized tissue  
● Dermal hypermineralized tissue

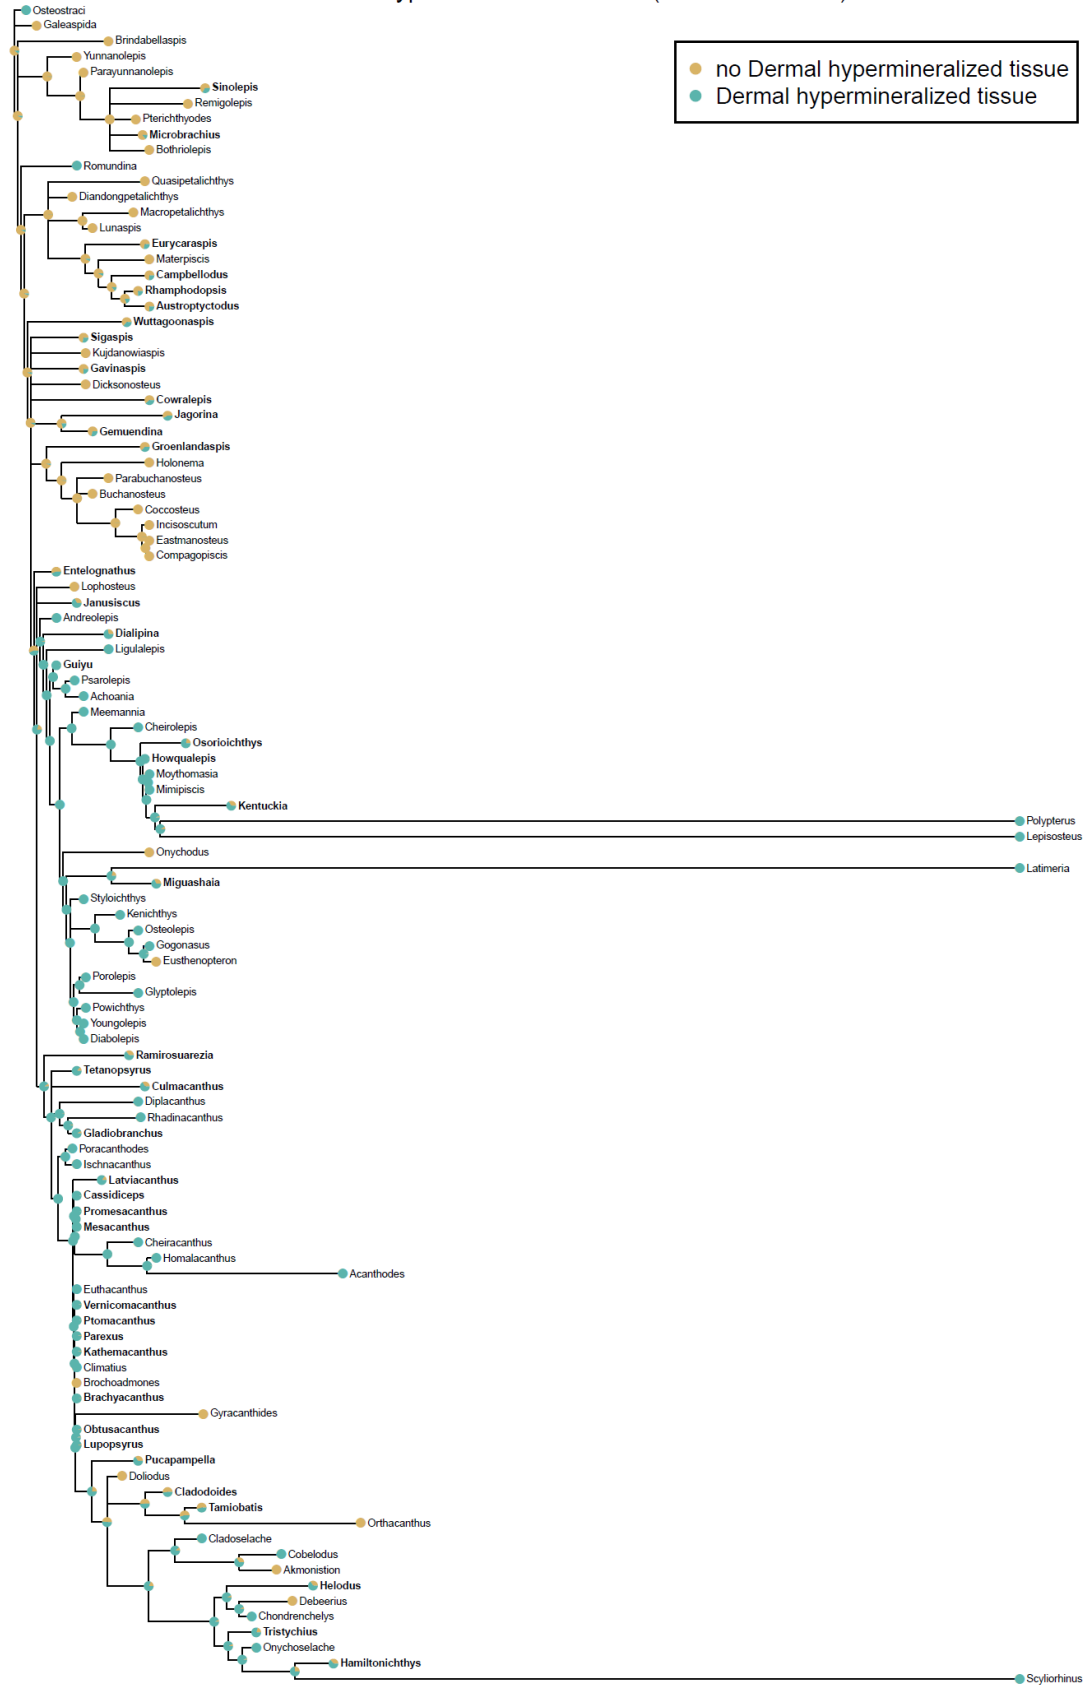



R

Dermal hypermineralized tissue (unconstrained tree)

● no Dermal hypermineralized tissue  
● Dermal hypermineralized tissue

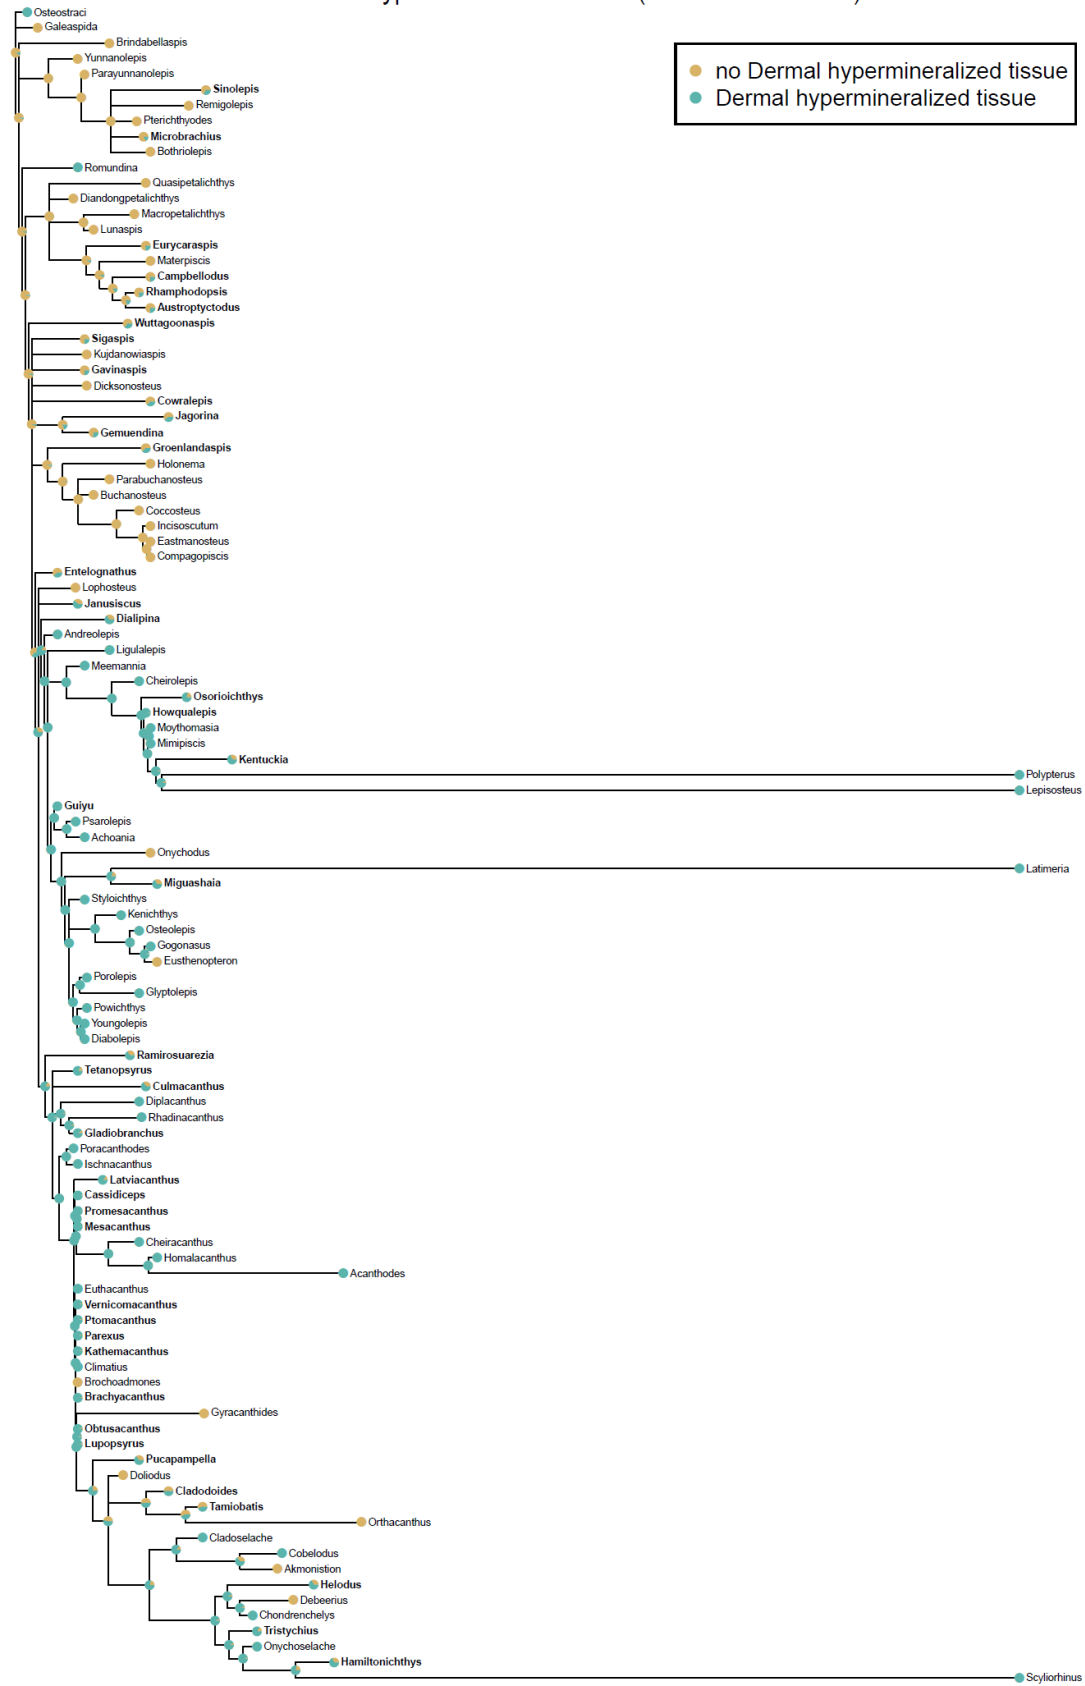

**S**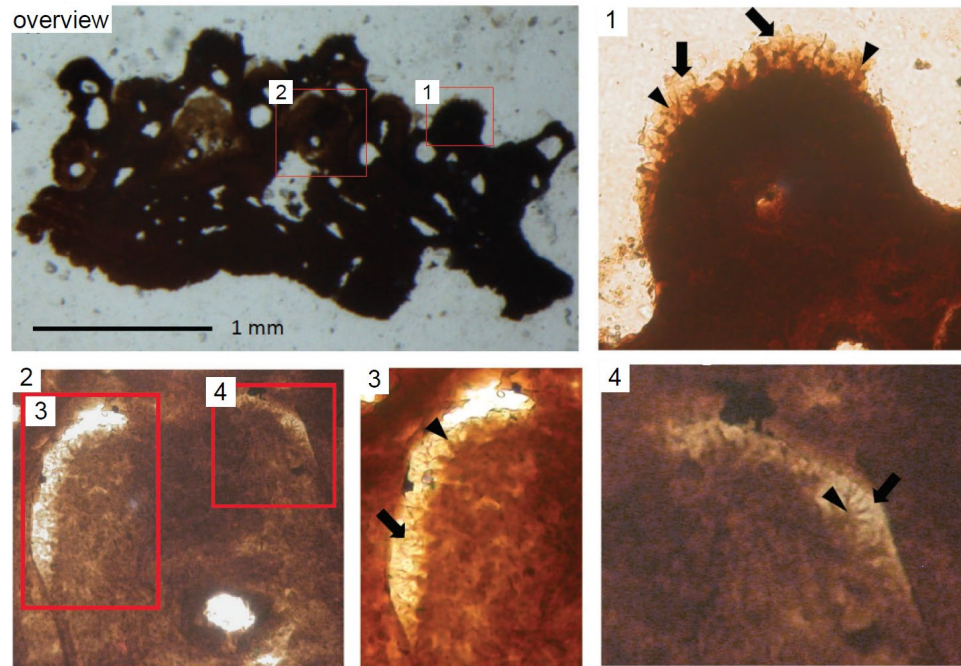

**Figure S3. Reconstructing ancestral states of hypermineralized tissues, Related to Figure 5.**

(A) Constrained tree used in ancestral state estimation. The GAP clade is constrained to a stem-osteichthyan affinity. Reliabilities of branches are shown at nodes as posterior probabilities.

(B) Unconstrained tree used in ancestral state estimation. The affinity of the GAP clade was unconstrained in the analysis and is resolved to a stem-sarcopterygian affinity. Reliabilities of branches are shown at nodes as posterior probabilities.

(C) Prediction of ancestral states of dental acrodin - GAP clade stem-osteichthyans, shown as pie charts.

(D) Prediction of ancestral states of dental acrodin - GAP clade unconstrained, shown as pie charts.

(E) Prediction of ancestral states of dental enameloid - GAP clade stem-osteichthyans, shown as pie charts.

(F) Prediction of ancestral states of dental enameloid - GAP clade unconstrained, shown as pie charts.

(G) Prediction of ancestral states of dermal enameloid - GAP clade stem-osteichthyans, shown as pie charts.

(H) Prediction of ancestral states of dermal enameloid - GAP clade unconstrained, shown as pie charts.

(I) Prediction of ancestral states of dental enamel - GAP clade stem-osteichthyans, shown as pie charts.

(J) Prediction of ancestral states of dental enamel - GAP clade unconstrained, shown as pie charts.

(K) Prediction of ancestral states of dermal enamel - GAP clade stem-osteichthyans, shown as pie charts.

(L) Prediction of ancestral states of dermal enamel - GAP clade unconstrained, shown as pie charts.

(M) Prediction of ancestral states of dermal ganoin - GAP clade stem-osteichthyans, shown as pie charts.

(N) Prediction of ancestral states of dermal ganoin - GAP clade unconstrained, shown as pie charts.

(O) Prediction of ancestral states of dermal enamel+ganoin - GAP clade stem-osteichthyans, shown as pie charts.

(P) Prediction of ancestral states of dermal enamel or ganoin - GAP clade unconstrained, shown as pie charts.

(Q) Prediction of ancestral states of dermal enamel, ganoin, or enameloid - GAP clade stem-osteichthyans, shown as pie charts.

(R) Prediction of ancestral states of dermal enamel, ganoin, or enameloid - GAP clade unconstrained, shown as pie charts.

(S) Cladoselache skin denticles [specimen P.9294 (NHMUK)]. Detail of boxed areas (1-4) in overview is enlarged. The dentin tubules (arrowheads), protruding through the enameloid layer (arrow), are clearly visible.

|                       | lpq20 | lpq8 | lpq7 | enam | scpp5 | scpp7 | lpq6 | ambn | lpq5 | lpq4 | scpp3dl | scpp3cl | scpp3bl | scpp3al | odam | lpq3 | scpp9 | lpq2 | lpq1 |
|-----------------------|-------|------|------|------|-------|-------|------|------|------|------|---------|---------|---------|---------|------|------|-------|------|------|
| Coverage <sup>1</sup> | 173   | 16   | 5    | 1761 | 6385  | 1768  | 3689 | 825  | 12   | 4    | 0       | 0       | 189     | 237     | 209  | 1119 | 69    | 336  | 2755 |
| FPKM                  | 54    | 6    | 2    | 548  | 2204  | 547   | 1118 | 262  | 4    | 2    | 0       | 0       | 101     | 106     | 66   | 338  | 21    | 102  | 1181 |
| Conf <sup>2</sup>     | 4     | 3    | 1    | 8    | 35    | 31    | 45   | 7    | 1    | 1    | 0       | 0       | 45      | 22      | 5    | 12   | 4     | 9    | 62   |

(continued)

|                       | dmp1 | scpp1 | dspp1 | ibsp | mepe1 | mepe2 | Spp1 | lpq17 | lpq16b | lpq16a | lpq15 | lpq14 | lpq13 | lpq12 | lpq19 | lpq11 | lpq18 | lpq1 | lpq9 |
|-----------------------|------|-------|-------|------|-------|-------|------|-------|--------|--------|-------|-------|-------|-------|-------|-------|-------|------|------|
| Coverage <sup>1</sup> | 33   | 237   | 33    | 632  | 513   | 991   | 1089 | 66    | 305    | 264    | 1010  | 79    | 126   | 951   | 386   | 1043  | 1201  | 3180 | 108  |
| FPKM                  | 12   | 72    | 11    | 211  | 193   | 313   | 326  | 20    | 125    | 101    | 341   | 23    | 38    | 317   | 117   | 331   | 383   | 1037 | 35   |
| Conf <sup>2</sup>     | 1    | 5     | 1     | 7    | 22    | 35    | 11   | 2     | 21     | 16     | 8     | 9     | 5     | 6     | 4     | 9     | 7     | 13   | 7    |

**Table S1. Expression levels of SCPP genes in the skin, Related to Figure 2.** Relative expression levels of SCPP genes in the skin were estimated as fragments per kilobase of transcript per million mapped reads (FPKM values) (Trapnell et al., 2010). <sup>1</sup>Coverage shows the estimate for the absolute depth of read coverage across the whole transcript. <sup>2</sup>Conf represents the 95% confidence interval.

| Taxa                 | Dermal characters |        |        |               |                         | Dental characters |           |        |
|----------------------|-------------------|--------|--------|---------------|-------------------------|-------------------|-----------|--------|
|                      | Enameloid         | Ganoin | Enamel | Enamel+Ganoin | Enamel+Ganoin+Enameloid | Acrodin           | Enameloid | Enamel |
| Galeaspida           | 0                 | 0      | 0      | 0             | 0                       | -                 | -         | -      |
| Osteostraci          | 1                 | 0      | 0      | 0             | 1                       | -                 | -         | -      |
| Acanthodes           | 1                 | 0      | 0      | 0             | 1                       | 0                 | 0/1       | 0/1    |
| Achoania             | 0                 | 0      | 1      | 1             | 1                       | 0/1               | 0/1       | 0/1    |
| Akmonistion          | 0                 | 0      | 0      | 0             | 0                       | 0                 | 1         | 0      |
| Austroptyctodus      | 0/1               | 0      | 0      | 0             | 0/1                     | 0/1               | 0/1       | 0/1    |
| Bothriolepis         | 0                 | 0      | 0      | 0             | 0                       | -                 | -         | -      |
| Brachyacanthus       | 0/1               | 0      | 0      | 0             | 0/1                     | -                 | -         | -      |
| Brindabellaspis      | 0                 | 0      | 0      | 0             | 0                       | 0/1               | 0/1       | 0/1    |
| Brochoadmones        | 0                 | 0      | 0      | 0             | 0                       | 0/1               | 0/1       | 0/1    |
| Buchanosteus         | 0                 | 0      | 0      | 0             | 0                       | 0/1               | 0/1       | 0/1    |
| Campbellodus         | 0/1               | 0      | 0      | 0             | 0/1                     | 0/1               | 0/1       | 0/1    |
| Cassidiceps          | 0/1               | 0      | 0      | 0             | 0/1                     | 0/1               | 0/1       | 0/1    |
| Cheiracanthus        | 1                 | 0      | 0      | 0             | 1                       | 0/1               | 0/1       | 0/1    |
| Cheirolepis          | 0                 | 1      | 0      | 1             | 1                       | 1                 | 0         | 0      |
| Chondrenchelys       | 1                 | 0      | 0      | 0             | 1                       | 0/1               | 0/1       | 0/1    |
| Cladodoides          | 0/1               | 0      | 0      | 0             | 0/1                     | 0/1               | 0/1       | 0/1    |
| Cladoselache         | 1                 | 0      | 0      | 0             | 1                       | 0                 | 1         | 0      |
| Climatius            | 1                 | 0      | 0      | 0             | 1                       | 0/1               | 0/1       | 0/1    |
| Cobelodus            | 1                 | 0      | 0      | 0             | 1                       | 0/1               | 0/1       | 0/1    |
| Cocosteus            | 0                 | 0      | 0      | 0             | 0                       | 0/1               | 0/1       | 0/1    |
| Compagopiscis        | 0                 | 0      | 0      | 0             | 0                       | 0                 | 0         | 0      |
| Cowralepis           | 0/1               | 0      | 0      | 0             | 0/1                     | 0/1               | 0/1       | 0/1    |
| Culmacanthus         | 0/1               | 0      | 0      | 0             | 0/1                     | 0/1               | 0/1       | 0/1    |
| Debeerius            | -                 | -      | 0      | 0             | 0                       | -                 | -         | -      |
| Diabolepis           | 0                 | 0      | 1      | 1             | 1                       | 0                 | 0         | 1      |
| Dialipina            | 0                 | 0/1    | 0      | 0/1           | 0/1                     | 0/1               | 0/1       | 0/1    |
| Diandongpetalichthys | 0                 | 0      | 0      | 0             | 0                       | 0/1               | 0/1       | 0/1    |
| Dicksonosteus        | 0                 | 0      | 0      | 0             | 0                       | 0/1               | 0/1       | 0/1    |
| Diplacanthus         | 1                 | 0      | 0      | 0             | 1                       | -                 | -         | -      |
| Doliodus             | 0                 | 0      | 0      | 0             | 0                       | 0/1               | 0/1       | 0/1    |
| Eastmanosteus        | 0                 | 0      | 0      | 0             | 0                       | 0/1               | 0/1       | 0/1    |
| Entelognathus        | 0/1               | 0      | 0      | 0             | 0/1                     | -                 | -         | -      |
| Eurycaraspis         | 0/1               | 0      | 0      | 0             | 0/1                     | 0/1               | 0/1       | 0/1    |
| Eusthenopteron       | 0                 | 0      | 0      | 0             | 0                       | 0                 | 0         | 1      |
| Euthacanthus         | 1                 | 0      | 0      | 0             | 1                       | -                 | -         | -      |
| Gavinaspis           | 0/1               | 0      | 0      | 0             | 0/1                     | 0/1               | 0/1       | 0/1    |
| Gemuendina           | 0/1               | 0      | 0      | 0             | 0/1                     | 0/1               | 0/1       | 0/1    |
| Gladiobranchus,      | 0/1               | 0      | 0      | 0             | 0/1                     | -                 | -         | -      |
| Glyptolepis          | 0                 | 0      | 1      | 1             | 1                       | 0                 | 0         | 1      |
| Gogonaspis           | 0                 | 0      | 1      | 1             | 1                       | 0                 | 0         | 1      |
| Groenlandaspis       | 0/1               | 0      | 0      | 0             | 0/1                     | 0/1               | 0/1       | 0/1    |
| Guiyu                | 0                 | 0/1    | 0/1    | 0/1           | 0/1                     | 0/1               | 0/1       | 0/1    |
| Gyracanthides        | 0                 | 0      | 0      | 0             | 0                       | -                 | -         | -      |
| Scyliorhinus         | 1                 | 0      | 0      | 0             | 1                       | 0                 | 1         | 0      |
| Hamiltonichthys      | 0/1               | 0      | 0      | 0             | 0/1                     | 0                 | 1         | 0      |
| Helodus              | 0/1               | 0      | 0      | 0             | 0/1                     | 0                 | 1         | 0      |
| Holonema             | 0                 | 0      | 0      | 0             | 0                       | 0                 | 0         | 0      |
| Homalacanthus        | 1                 | 0      | 0      | 0             | 1                       | -                 | -         | -      |
| Howqualepis          | 0                 | 0/1    | 0      | 0/1           | 0/1                     | 0/1               | 0/1       | 0/1    |
| Incisoscutum         | 0                 | 0      | 0      | 0             | 0                       | 0/1               | 0/1       | 0/1    |
| Ischnacanthus        | 1                 | 0      | 0      | 0             | 1                       | 0                 | 1         | 0      |
| Jagorina             | 0/1               | 0      | 0      | 0             | 0/1                     | 0/1               | 0/1       | 0/1    |
| Janusiscus           | 0/1               | 0      | 0/1    | 0/1           | 0/1                     | 0/1               | 0/1       | 0/1    |

|                   |     |     |   |     |     |     |     |     |
|-------------------|-----|-----|---|-----|-----|-----|-----|-----|
| Kathemacanthus    | 0/1 | 0   | 0 | 0   | 0/1 | -   | -   | -   |
| Kenichthys        | 0   | 0   | 1 | 1   | 1   | 0/1 | 0/1 | 0/1 |
| Kentuckia         | 0   | 0/1 | 0 | 0/1 | 0/1 | 0/1 | 0/1 | 0/1 |
| Kujdanowiaspis    | 0   | 0   | 0 | 0   | 0   | 0/1 | 0/1 | 0/1 |
| Latviacanthus     | 0/1 | 0   | 0 | 0   | 0/1 | 0   | 0   | 0   |
| Ligulalepis       | 0   | 1   | 0 | 1   | 1   | 1   | 0   | 0   |
| Lophosteus        | 0   | 0   | 0 | 0   | 0   | 0   | 0   | 0   |
| Lunaspis          | 0   | 0   | 0 | 0   | 0   | 0/1 | 0/1 | 0/1 |
| Lupopsyrus        | 0/1 | 0/1 | 0 | 0/1 | 0/1 | -   | -   | -   |
| Macropetalichthys | 0   | 0   | 0 | 0   | 0   | 0/1 | 0/1 | 0/1 |
| Materpiscis       | 0   | 0   | 0 | 0   | 0   | 0/1 | 0/1 | 0/1 |
| Meemannia         | 0   | 0   | 1 | 1   | 1   | 0/1 | 0/1 | 0/1 |
| Mesacanthus       | 0/1 | 0   | 0 | 0   | 0/1 | -   | -   | -   |
| Microbrachius     | 0/1 | 0   | 0 | 0   | 0/1 | 0/1 | 0/1 | 0/1 |
| Miguashaia        | 0/1 | 0/1 | 0 | 0/1 | 0/1 | 0   | 0   | 1   |
| Lepisosteus       | 0   | 1   | 0 | 1   | 1   | 1   | 0   | 1   |
| Polypterus        | 0   | 1   | 0 | 1   | 1   | 1   | 0   | 1   |
| Mimipiscis        | 0   | 1   | 0 | 1   | 1   | 1   | 0   | 0   |
| Moythomasia       | 0   | 1   | 0 | 1   | 1   | 1   | 0   | 0   |
| Obtusacanthus     | 0/1 | 0   | 0 | 0   | 0/1 | -   | -   | -   |
| Onychodus         | 0   | 0   | 0 | 0   | 0   | 0   | 0   | 1   |
| Onychoselache     | 1   | 0   | 0 | 0   | 1   | 0   | 1   | 0   |
| Orthacanthus      | 0   | 0   | 0 | 0   | 0   | 0   | 1   | 0   |
| Osorioichthys     | 0   | 0/1 | 0 | 0/1 | 0/1 | 1   | 0   | 0   |
| Osteolepis        | 0   | 0   | 1 | 1   | 1   | 0/1 | 0/1 | 0/1 |
| Parabuchanosteus  | 0   | 0   | 0 | 0   | 0   | 0/1 | 0/1 | 0/1 |
| Parayunnanolepis  | 0   | 0   | 0 | 0   | 0   | 0/1 | 0/1 | 0/1 |
| Parexus           | 0/1 | 0   | 0 | 0   | 0/1 | 0   | 0   | 0   |
| Poracanthodes     | 1   | 0   | 0 | 0   | 1   | 0/1 | 0/1 | 0/1 |
| Porolepis         | 0   | 0   | 1 | 1   | 1   | 0   | 0   | 1   |
| Powichthys        | 0   | 0   | 1 | 1   | 1   | 0   | 0   | 1   |
| Promesacanthus    | 0/1 | 0   | 0 | 0   | 0/1 | -   | -   | -   |
| Psarolepis        | 0   | 0   | 1 | 1   | 1   | 0   | 0   | 0   |
| Pterichthyodes    | 0   | 0   | 0 | 0   | 0   | 0/1 | 0/1 | 0/1 |
| Ptomacanthus      | 0/1 | 0   | 0 | 0   | 0/1 | 0/1 | 0/1 | 0/1 |
| Pucapampella      | 0/1 | 0   | 0 | 0   | 0/1 | 0/1 | 0/1 | 0/1 |
| Quasipetalichthys | 0   | 0   | 0 | 0   | 0   | 0/1 | 0/1 | 0/1 |
| Ramirosuarezia    | 0/1 | 0   | 0 | 0   | 0/1 | 0/1 | 0/1 | 0/1 |
| Remigolepis       | 0   | 0   | 0 | 0   | 0   | 0/1 | 0/1 | 0/1 |
| Rhadinacanthus    | 1   | 0   | 0 | 0   | 1   | -   | -   | -   |
| Rhamphodopsis     | 0/1 | 0   | 0 | 0   | 0/1 | 0   | 0   | 0   |
| Romundina         | 1   | 0   | 0 | 0   | 1   | 0/1 | 0/1 | 0/1 |
| Sigaspis          | 0/1 | 0   | 0 | 0   | 0/1 | 0/1 | 0/1 | 0/1 |
| Sinolepis         | 0/1 | 0   | 0 | 0   | 0/1 | 0/1 | 0/1 | 0/1 |
| Styloichthys      | 0   | 0   | 1 | 1   | 1   | 0/1 | 0/1 | 0/1 |
| Latimeria         | 0   | 0/1 | 1 | 1   | 1   | 0   | 0   | 1   |
| Tamiobatis        | 0/1 | 0   | 0 | 0   | 0/1 | 0/1 | 0/1 | 0/1 |
| Tetanopsyrus      | 0/1 | 0   | 0 | 0   | 0/1 | -   | -   | -   |
| Tristychius       | 0/1 | 0   | 0 | 0   | 0/1 | 0/1 | 0/1 | 0/1 |
| Vernicomacanthus  | 0/1 | 0   | 0 | 0   | 0/1 | 0   | 0   | 0   |
| Wuttagoonaspis    | 0/1 | 0   | 0 | 0   | 0/1 | 0/1 | 0/1 | 0/1 |
| Youngolepis       | 0   | 0   | 1 | 1   | 1   | 0   | 0   | 1   |
| Yunnanolepis      | 0   | 0   | 0 | 0   | 0   | 0/1 | 0/1 | 0/1 |
| Andreolepis       | 0   | 0   | 1 | 1   | 1   | 0   | 0   | 0   |

**Table S2. Presence or absence of enameloid, ganoin, enamel, enamel or ganoin, enamel, ganoin, or enameloid in the dermal skeleton, and acrodin, enameloid, and enamel on teeth, Related to Figure 5. 0, 1, and 0/1 represent the absence, presence, and unknown status of the tissue, respectively. “-” in dental characters represents the absence of teeth.**

| Taxa                 | Minimum age (Mya) | Reference              |
|----------------------|-------------------|------------------------|
| Galeaspida           | 432.6             |                        |
| Osteostraci          | 437.4             |                        |
| Acanthodes           | 298               | King et al. 2016       |
| Achoania             | 412               | King et al. 2016       |
| Akmonistion          | 327               | King et al. 2016       |
| Austroptyctodus      | 383               | King et al. 2016       |
| Bothriolepis         | 383               | King et al. 2016       |
| Brachyacanthus       | 415               | King et al. 2016       |
| Brindabellaspis      | 401               | King et al. 2016       |
| Brochoadmones        | 415               | King et al. 2016       |
| Buchanosteus         | 408               | King et al. 2016       |
| Campbellodus         | 383               | King et al. 2016       |
| Cassidiceps          | 415               | King et al. 2016       |
| Cheiracanthus        | 388               | King et al. 2016       |
| Cheirolepis          | 388               | King et al. 2016       |
| Chondrenchelys       | 338               | King et al. 2016       |
| Cladodoides          | 375               | King et al. 2016       |
| Cladoselache         | 360               | King et al. 2016       |
| Climatius            | 415               | King et al. 2016       |
| Cobelodus            | 325               | King et al. 2016       |
| Coccosteus           | 388               | King et al. 2016       |
| Compagopiscis        | 383               | King et al. 2016       |
| Cowralepis           | 383               | King et al. 2016       |
| Culmacanthus         | 385               | King et al. 2016       |
| Debeerius            | 320               | King et al. 2016       |
| Diabolepis           | 412               | King et al. 2016       |
| Dialipina            | 401               | King et al. 2016       |
| Diangongpetalichthys | 417               | King et al. 2016       |
| Dicksonosteus        | 411               | King et al. 2016       |
| Diplacanthus         | 388               | King et al. 2016       |
| Doliodus             | 395               | King et al. 2016       |
| Eastmanosteus        | 383               | King et al. 2016       |
| Entelognathus        | 424               | King et al. 2016       |
| Eurycaraspis         | 385               | King et al. 2016       |
| Eusthenopteron       | 380               | King et al. 2016       |
| Euthacanthus         | 415               | King et al. 2016       |
| Gavinaspis           | 412               | King et al. 2016       |
| Gemuendina           | 408               | King et al. 2016       |
| Gladiobranchus       | 415               | King et al. 2016       |
| Glyptolepis          | 388               | King et al. 2016       |
| Gogonaspis           | 383               | King et al. 2016       |
| Groenlandaspis       | 385               | King et al. 2016       |
| Guiyu                | 424               | King et al. 2016       |
| Gyracanthides        | 359.3             | Warren et al. 2000     |
| Scylliorhinus        | 0                 |                        |
| Hamiltonichthys      | 302               | King et al. 2016       |
| Helodus              | 311               | King et al. 2016       |
| Holonema             | 383               | King et al. 2016       |
| Homalacanthus        | 380               | King et al. 2016       |
| Howqualepis          | 385               | King et al. 2016       |
| Incisoscutum         | 383               | King et al. 2016       |
| Ischnacanthus        | 415               | King et al. 2016       |
| Jagorina             | 375               | King et al. 2016       |
| Janusiscus           | 415               | King et al. 2016       |
| Kathemacanthus       | 415               | King et al. 2016       |
| Kenichthys           | 396               | King et al. 2016       |
| Kentuckia            | 347               | King et al. 2016       |
| Kujdanowiaspis       | 411               | King et al. 2016       |
| Latviacanthus        | 404               | King et al. 2016       |
| Ligulalepis          | 401               | King et al. 2016       |
| Lophosteus           | 416               | Cunningham et al. 2012 |
| Lunaspis             | 408               | King et al. 2016       |
| Lupopsyrus           | 415               | King et al. 2016       |
| Macropetalichthys    | 390               | King et al. 2016       |
| Materpiscis          | 383               | King et al. 2016       |
| Meemannia            | 412               | King et al. 2016       |
| Mesacanthus          | 415               | King et al. 2016       |
| Microbrachius        | 386               | King et al. 2016       |
| Miguashaia           | 380               | King et al. 2016       |
| Lepisosteus          | 0                 |                        |
| Polypterus           | 0                 |                        |
| Mimipiscis           | 383               | King et al. 2016       |
| Moythomasia          | 383               | King et al. 2016       |

|                   |       |                       |
|-------------------|-------|-----------------------|
| Obtusacanthus     | 415   | King et al. 2016      |
| Onychodus         | 383   | King et al. 2016      |
| Onychoselache     | 336   | King et al. 2016      |
| Orthacanthus      | 290   | King et al. 2016      |
| Osorioichthys     | 367   | King et al. 2016      |
| Osteolepis        | 388   | King et al. 2016      |
| Parabuchanosteus  | 401   | King et al. 2016      |
| Parayunnanolepis  | 412   | King et al. 2016      |
| Parexus           | 415   | King et al. 2016      |
| Poracanthodes     | 417   | King et al. 2016      |
| Porolepis         | 411   | King et al. 2016      |
| Powichthys        | 411   | King et al. 2016      |
| Promesacanthus    | 415   | King et al. 2016      |
| Psarolepis        | 416   | King et al. 2016      |
| Andreolepis       | 424   | Chen et al. 2016      |
| Pterichthyodes    | 389   | King et al. 2016      |
| Ptomacanthus      | 415   | King et al. 2016      |
| Pucapampella      | 388   | King et al. 2016      |
| Quasipetalichthys | 385   | King et al. 2016      |
| Ramirosuarezia    | 392   | King et al. 2016      |
| Remigolepis       | 366   | King et al. 2016      |
| Rhadinacanthus    | 386.9 | Lukševičs et al. 2010 |
| Rhamphodopsis     | 388   | King et al. 2016      |
| Romundina         | 415   | King et al. 2016      |
| Sigaspis          | 412   | King et al. 2016      |
| Sinolepis         | 358.5 | Zhu et al. 2000       |
| Styloichthys      | 412   | King et al. 2016      |
| Latimeria         | 0     |                       |
| Tamiobatis        | 360   | King et al. 2016      |
| Tetanopsyrus      | 415   | King et al. 2016      |
| Tristychius       | 336   | King et al. 2016      |
| Vernicomacanthus  | 415   | King et al. 2016      |
| Wuttagoonaspis    | 393   | King et al. 2016      |
| Youngolepis       | 412   | King et al. 2016      |
| Yunnanolepis      | 415   | King et al. 2016      |

**Table S3. Tip ages used for the ancestral state estimation, Related to Figure 5.**



## Transparent Methods

### Bioinformatic analyses

We searched for SSCP genes in RNA-seq datasets (GenBank accession numbers: SRX796494 and SRX1016233-SRX1016241 for lungfish, SRX796491 and SRX1386644- SRX1386647 for bichir, and SRX424533 and SRX424534 for sturgeon) by tblstn (<http://www.ncbi.nlm.nih.gov/>) (Altschul et al., 1990) using amino acid sequences of gar orthologs as queries (Kawasaki et al., 2017).

Relative expression levels of gar SSCP genes were estimated as FPKM values (Trapnell et al., 2010), calculated for a dataset of gar skin (GenBank accession number, SRP042013) (Braasch et al., 2016) using Galaxy (<https://usegalaxy.org/>) (Afgan et al., 2016). The dataset was retrieved from the EBI SRA database, trimmed using Trimmomatic (Bolger et al., 2014), aligned with the gar genome sequence (LepOcu1) using TopHat (Kim et al., 2013). FPKM values and confidence intervals were calculated using Cufflinks (Trapnell et al., 2010) based on BAM files obtained by the TopHat analysis. All default conditions were used in Galaxy analysis, except additional options in Trimmomatic (ILLUMINACLIP and MINLEN=50) and Cufflinks (multi-read correction). Genomic coordinates of SSCP genes were determined using Splign ([http://www.ncbi.nlm.gov./](http://www.ncbi.nlm.gov/)) (Kapustin et al., 2008), and used for the Cufflinks analysis.

### Molecular analysis

All animals used in our study (gar, 16-55 cm in total length; zebrafish, 3.0 cm in total length; bichir, 20 cm in total length; and lungfish, 20 cm in total length; sex not determined for these animals) were sacrificed according to the guidelines issued by the Ministry of Justice in Japan. SSCP genes identified in bichir and lungfish RNA-seq datasets were confirmed by PCR using cDNA libraries made from a tooth plate (lungfish) and tooth germs (bichirs), as described (Braasch et al., 2016). These libraries were made using SMART cDNA library construction kit (Takara Bio), and PCR products were size fractionated by agarose gel electrophoresis, purified from the agarose gel using the FastGene Gel/PCR Extraction Kit (Nippon Genetics), and ligated into T-vector pMD20 (Takara Bio). The ligation mix was then used to transform *E.*

*coli* HSTo8 Premium Competent Cells (Takara Bio). Exon-intron borders were also determined by PCR using genomic DNA as the substrate. For expression analysis of bichir *scpp5*, total RNA molecules were isolated using RNAiso Plus (Takara Bio) and cDNA was synthesized using the PrimerScript II 1st strand cDNA synthesis kit (Takara bio). Primer sequences used for RT-PCR are as follows: 5'-GAGACTTGCGATCTTCTCTTCTG-3' and 5'-GTGAATTGACCTGAGGCAGGA-3' for *scpp5*; and 5'-CACAGTTTGCCAGATGGTCC-3' and 5'-CACCACCAATTGCCTTGCTC-3' for *gapdh*.

### ISH analysis

For ISH analysis, jaws and skin of gar and zebrafish were fixed with neutralized 4% paraformaldehyde, decalcified with Morse's solution (10% w/v sodium citrate and 22.5% v/v formic acid), dehydrated through a graded ethanol series and xylene, embedded in paraffin, sectioned in the coronal plane at 4 µm in thickness, and mounted on glass slides. These glass slides were deparaffined, treated with Proteinase K (20 mg/ml) for 10 min, and used for hybridization (50% formamide, 10 mM Tris pH7.6, 1xDenhart's solution, 5% dextran sulfate, 600 mM NaCl, 0.25% SDS, 1 mM EDTA, and 100µg/ml *Escherichia coli* tRNA) at 70C (Nakatomi et al., 2006). A specific portion of *scpp5*, *ambn*, and *enam* were amplified from the cDNA libraries (primer sequences: 5'-GTTGGTGCTACAGCAGGAAGT-3' and 5'-GTTGTGCTTCCCTGAACTG-3' for gar *ambn*; 5'-AAGGCCTCAGCTTCGTCCAG-3' and 5'-ACTCCTTCTCGTTGACTTCGT-3' for gar *enam*; 5'-TATTCTGAGGAGTCACCAA-3' and 5'-ATTCTGACTTGGCTGGACG-3' for gar *scpp5*; 5'-ACTTCATCAACAGGTGCCCAATC-3' and 5'-TGAAAGCTCCGTGACCTGAATCT-3' for zebrafish *ambn*; and 5'-CTGCCCCTGACAGTGGCAGTAATG-3' and 5'-CATCAGGCCCAACAACAGTGGTGT-3' for zebrafish *enam*), cloned using the pGEM-T Easy Vector (Promega), and labeled with digoxigenin using the DIG RNA Labeling Kit (Roche), and used for hybridization. After hybridization, glass slides were washed with 2xSSC. Hybridization signals were detected using Anti-Digoxigenin-AP, Fab fragments (Roche) and NBT/BCIP Solution (Roche), as specified.

## **IHC analysis**

For IHC analysis, jaws and scales were fixed (4% paraformaldehyde-0.2% glutaraldehyde, 0.05M HEPES buffer pH7.4), dehydrated, and embedded in LR-White resin (LR-W, London Resin), and processed for the Protein A-gold (PAG) method (Sasagawa et al., 2012). For light microscopic analysis, semi-thin sections were made from LR-W resin block, mounted on glass slides, masked with 5% goat serum in phosphate buffered saline (PBS), and reacted with the antibody diluted 1:100 or 1:200 in PBS containing 0.5% bovine serum albumin (PBS-BSA) at 4C. These sections were washed with PBS, incubated with the PAG conjugate (gold nanoparticles 5nm, BBI) diluted 1:100 with PBS-BSA, washed with PBS, treated with the silver enhancer solution (50 mM citrate buffer, 0.85% hydroquinone, 0.1% maleic acid, 0.11% silver lactate, and 1% acacia powder) (Uchida et al., 1991) for 10 min in a dark box, and rinsed with water. These sections were then immersed in photographic fixatives, and stained with fast red or toluidine blue (Sasagawa et al., 2012).

For TEM analysis, ultrathin sections obtained from LR-W resin block were mounted on nickel grids, floated on a drop of 1% goat serum and then the antibody diluted 1:200-1:400 in PBS-BSA. These sections were subsequently washed with PBS-BSA, treated with 1% goat serum and then with the PAG conjugate diluted 1:10 in PBS-BSA. These sections were stained with platinum blue and lead citrate (additionally stained with phosphotungstic acid for some samples), and examined using TEM (JEM-1010, JEOL) (Sasagawa et al., 2016). In some sections, immunoreactions were enhanced using the silver enhancer solution (Uchida et al., 1991) or the Silver Enhancer Kit (Kirkegaard & Perry Laboratories). Polyclonal antibodies to gar Scpp5 were raised against YRQQPQQN (SIGMA-ALDRICH).

## **Phylogenetic analysis**

We augmented an existing phylogenetic dataset (Qiao et al., 2016) with codings for *Scyliorhinus*, *Lepisosteus*, *Polypterus*, and *Latimeria*, representing the three major living clades of jawed vertebrates. We also coded *Andreolepis*, a putative stem-osteichthyan (Qu et al., 2015), and coded *Ligulalepis* as

present for dental acrodin (Schultze, 2016; Schultze, 2018). Morphological data were analyzed using the Mkv+G model in MrBayes 3.2.7 (Ronquist et al., 2012). We constrained the positions of the extant taxa to mitigate long branch effects: *Scyliorhinus* with *Helodus*, *Chondrenchelys*, *Debeerius*, *Tristychius*, *Hamiltonichthys*, *Onychoselache* (Qiao et al., 2016); *Latimeria* with *Miguashaia* (Arratia and Schultze, 2015); and *Polypterus*, *Lepisosteus*, *Kentuckia* with *Moythomasia*, *Mimipiscis* (Giles et al., 2017). We conducted two phylogenetic analyses of this dataset, one in which the GAP clade were constrained to be stem-osteichthyans (King et al., 2017; Lu et al., 2017), and the other in which these taxa were topologically unconstrained, yielding a stem-sarcopterygian affinity (Lu et al., 2016; Qiao et al., 2016; Choo et al., 2017). Each analysis used four independent runs of four chains over 10,000,000 generations, sampling every 10,000 generations, with 25% of burnin. Convergence was assessed using Tracer 1.7 (Rambaut et al., 2018). Results were summarized using majority rule consensus trees (Figures S3A and S3B).

### **Ancestral state estimation**

We compiled data on the distribution of five dermal (enameloid, ganoin, enamel, ganoin/enamel, hypermineralized tissue) and three dental (acrodin, enameloid, enamel) skeletal characters (Table S2); we confirmed the presence of dental enameloid in *Cladoselache* (Figure S3S).

Branch lengths were estimated using the function *timePaleoPhy* in the R package (<https://www.R-project.org/>) *paleotree* (Bapst, 2012) using the 'equal' method (Brusatte et al., 2008), with the root age increased by 5 million years. Tip ages are from King et al. (King et al., 2017) (Table S3) but the root (Tinn and Märss, 2018), and the crown clades of chondrichthyans, sarcopterygians, actinopterygians, osteichthyans, and gnathostomes (Benton et al., 2015) were calibrated to be minimally as old as oldest fossil representative. Using these time-scaled topologies, we estimated ancestral states using Stochastic Character Mapping (Huelsenbeck et al., 2003) in the R package *phytools* (Revell, 2012). Each character was coded as a binary presence or absence state for all taxa; uncertain tip states were assigned an equal prior probability of 0.5. Taxa were excluded from an analysis when the character was

inapplicable. By running all separate analyses for each character, there is zero modelled co-variance between each character. Stochastic character mapping was run using the *make.simmap* function (Bollback, 2006) in *phytools* but with a single Q matrix for all simulations under the 'all rates different' and a naïve equal prior probability for absence or presence at the root. Each character model ran for 1000 simulations and each iteration used the same 'empirical' Q matrix with the highest likelihood transition probabilities. Results were summarized using the *describe.simmap* function and the posterior probabilities of node and tip states were plotting on each tree.

## Supplemental References

- Afgan, E., Baker, D., van den Beek, M., Blankenberg, D., Bouvier, D., Cech, M., Chilton, J., Clements, D., Coraor, N., Eberhard, C., et al. (2016). The Galaxy platform for accessible, reproducible and collaborative biomedical analyses: 2016 update. *Nucleic Acids Res.* 44, W3-W10.
- Altschul, S.F., Gish, W., Miller, W., Myers, E.W., and Lipman, D.J. (1990). Basic local alignment search tool. *J. Mol. Biol.* 215, 403-410.
- Arratia, G., and Schultze, H.-P. (2015). A new fossil actinistian from the Early Jurassic of Chile and its bearing on the phylogeny of Actinistia. *J. Vertebr. Paleontol.* 35, e983524.
- Bapst, D.W. (2012). paleotree: an R package for paleontological and phylogenetic analyses of evolution. *Methods Ecol. Evol.* 3, 803-807.
- Benton, M.J., Donoghue, P.C.J., Asher, R.J., Friedman, M., Near, T.J., and Vinther, J. (2015). Constraints on the timescale of animal evolutionary history. *Palaeontol. Electronica* 18,
- Bolger, A.M., Lohse, M., and Usadel, B. (2014). Trimmomatic: a flexible trimmer for Illumina sequence data. *Bioinformatics* 30, 2114-2120.
- Bollback, J.P. (2006). SIMMAP: stochastic character mapping of discrete traits on phylogenies. *BMC Bioinformatics* 7, 88.
- Braasch, I., Gehrke, A.R., Smith, J.J., Kawasaki, K., Manousaki, T., Pasquier, J., Amores, A., Desvignes, T., Batzel, P., Catchen, J., et al. (2016). The spotted gar genome illuminates vertebrate evolution and facilitates human-teleost comparisons. *Nat. Genet.* 48, 427-437.
- Brusatte, S.L., Benton, M.J., Ruta, M., and Lloyd, G.T. (2008). Superiority, competition, and opportunism in the evolutionary radiation of dinosaurs. *Science* 321, 1485-1488.
- Chen, D., Blom, H., Sanchez, S., Tafforeau, P., and Ahlberg, P.E. (2016). The stem osteichthyan *Andreolepis* and the origin of tooth replacement. *Nature* 539, 237-241.
- Choo, B., Zhu, M., Qu, Q., Yu, X., Jia, L., and Zhao, W. (2017). A new osteichthyan from the late Silurian of Yunnan, China. *PLoS One* 12, e0170929.

- Cunningham, J.A., Rucklin, M., Blom, H., Botella, H., and Donoghue, P.C. (2012). Testing models of dental development in the earliest bony vertebrates, *Andreolepis* and *Lophosteus*. *Biol. Lett.* 8, 833-837.
- Giles, S., Xu, G.H., Near, T.J., and Friedman, M. (2017). Early members of 'living fossil' lineage imply later origin of modern ray-finned fishes. *Nature* 549, 265-268.
- Goldsmith, M.I., Fisher, S., Waterman, R., and Johnson, S.L. (2003). Saltatory control of isometric growth in the zebrafish caudal fin is disrupted in long fin and rapunzel mutants. *Dev. Biol.* 259, 303-317.
- Huelsenbeck, J.P., Nielsen, R., and Bollback, J.P. (2003). Stochastic mapping of morphological characters. *Syst. Biol.* 52, 131-158.
- Kapustin, Y., Souvorov, A., Tatusova, T., and Lipman, D. (2008). Splign: algorithms for computing spliced alignments with identification of paralogs. *Biol. Direct.* 3, 20.
- Kawasaki, K. (2009). The SCPP gene repertoire in bony vertebrates and graded differences in mineralized tissues. *Dev. Genes Evol.* 219, 147-157.
- Kawasaki, K., and Amemiya, C.T. (2014). SCPP genes in the coelacanth: tissue mineralization genes shared by sarcopterygians. *J. Exp. Zool. B Mol. Dev. Evol.* 322, 390-402.
- Kawasaki, K., Mikami, M., Nakatomi, M., Braasch, I., Batzel, P., J, H.P., Sato, A., Sasagawa, I., and Ishiyama, M. (2017). SCPP genes and their relatives in gar: rapid expansion of mineralization genes in osteichthyans. *J. Exp. Zool. B Mol. Dev. Evol.* 328, 645-665.
- Kim, D., Pertea, G., Trapnell, C., Pimentel, H., Kelley, R., and Salzberg, S.L. (2013). TopHat2: accurate alignment of transcriptomes in the presence of insertions, deletions and gene fusions. *Genome Biol.* 14, R36.
- King, B., Qiao, T., Lee, M.S.Y., Zhu, M., and Long, J.A. (2017). Bayesian morphological clock methods resurrect placoderm monophyly and reveal rapid early evolution in jawed vertebrates. *Syst. Biol.* 66, 499-516.
- Lu, J., Giles, S., Friedman, M., den Blaauwen, J.L., and Zhu, M. (2016). The oldest actinopterygian highlights the cryptic early history of the hyperdiverse ray-finned fishes. *Curr. Biol.* 26, 1602-1608.

- Lu, J., Giles, S., Friedman, M., and Zhu, M. (2017). A new stem sarcopterygian illuminates patterns of character evolution in early bony fishes. *Nat. Commun.* 8, 1932.
- Lukševičs, E., Lebedev, O.A., and Zakharenko, G.V. (2010). Palaeozoogeographical connections of the Devonian vertebrate communities of the Baltica Province. Part I. Eifelian–Givetian. *Palaeoworld* 19, 94-107.
- Nakatomi, M., Morita, I., Eto, K., and Ota, M.S. (2006). Sonic hedgehog signaling is important in tooth root development. *J. Dent. Res.* 85, 427-431.
- Qiao, T., King, B., Long, J.A., Ahlberg, P.E., and Zhu, M. (2016). Early Gnathostome Phylogeny Revisited: Multiple Method Consensus. *PLoS One* 11, e0163157.
- Qu, Q., Haitina, T., Zhu, M., and Ahlberg, P.E. (2015). New genomic and fossil data illuminate the origin of enamel. *Nature* 526, 108-111.
- Rambaut, A., Drummond, A.J., Xie, D., Baele, G., and Suchard, M.A. (2018). Posterior Summarization in Bayesian Phylogenetics Using Tracer 1.7. *Syst. Biol.* 67, 901-904.
- Revell, L.J. (2012). phytools: an R package for phylogenetic comparative biology (and other things). *Methods Ecol. Evol.* 3, 217-223.
- Ronquist, F., Teslenko, M., van der Mark, P., Ayres, D.L., Darling, A., Höhna, S., Larget, B., Liu, L., Suchard, M.A., and Huelsenbeck, J.P. (2012). MrBayes 3.2: efficient Bayesian phylogenetic inference and model choice across a large model space. *Syst. Biol.* 61, 539-542.
- Sasagawa, I., Oka, S., Mikami, M., Yokosuka, H., Ishiyama, M., Imai, A., Shimokawa, H., and Uchida, T. (2016). Immunohistochemical and Western Blotting Analyses of Ganoine in the Ganoid Scales of *Lepisosteus oculatus*: an Actinopterygian Fish. *J. Exp. Zool. B Mol. Dev. Evol.* 326, 193-209.
- Sasagawa, I., Yokosuka, H., Ishiyama, M., Mikami, M., Shimokawa, H., and Uchida, T. (2012). Fine structural and immunohistochemical detection of collar enamel in the teeth of *Polypterus senegalus*, an actinopterygian fish. *Cell Tissue Res.* 347, 369-381.
- Schultze, H.-P. (2018). Hard tissues in fish evolution: history and current issues. *Cybium* 42, 29-39.



- Schultze, H.-P. (2016). Scales, enamel, cosmine, ganoine, and early osteichthyans. *C. R. Palevol.* 15, 83-102.
- Tanabe, T., Aoba, T., Moreno, E.C., Fukae, M., and Shimizu, M. (1990). Properties of phosphorylated 32 kd nonamelogenin proteins isolated from porcine secretory enamel. *Calcif. Tissue Int.* 46, 205-215.
- Tinn, O., and Märss, T. (2018). The earliest osteostracan *Kalanaspis delectabilis* gen. et sp nov. from the mid-Aeronian (mid-Llandovery, lower Silurian) of Estonia. *J. Vertebr. Paleontol.* 38, e1425212.
- Trapnell, C., Williams, B.A., Pertea, G., Mortazavi, A., Kwan, G., van Baren, M.J., Salzberg, S.L., Wold, B.J., and Pachter, L. (2010). Transcript assembly and quantification by RNA-Seq reveals unannotated transcripts and isoform switching during cell differentiation. *Nat. Biotechnol.* 28, 511-515.
- Uchida, T., Tanabe, T., Fukae, M., Shimizu, M., Yamada, M., Miake, K., and Kobayashi, S. (1991). Immunochemical and immunohistochemical studies, using antisera against porcine 25 kDa amelogenin, 89 kDa enamelin and the 13-17 kDa nonamelogenins, on immature enamel of the pig and rat. *Histochemistry* 96, 129-138.
- Warren, A., Currie, B.P., Burrow, C., and Turner, S. (2000). A redescription and reinterpretation of *Gyracanthides murrayi* Woodward 1906 (Acanthodii, Gyracanthidae) from the Lower Carboniferous of the Mansfield Basin, Victoria, Australia. *J. Vertebr. Paleontol.* 20, 225-242.
- Yamakoshi, Y., Pinheiro, F.H., Tanabe, T., Fukae, M., and Shimizu, M. (1998). Sites of asparagine-linked oligosaccharides in porcine 32 kDa enamelin. *Connect. Tissue Res.* 39, 39-46; discussion 63-37.
- Zhu, M., Wang, N.-Z., and Wang, J.-Q. (2000). Devonian macro-and microvertebrate assemblages of China. *Cour. For. Senckenbg.* 223, 361-372.
